# Supplementary material for: Unexpected triaxial preferences in some all-syn 1,3,5-trifluorocyclohexanes
Source: Royal Society of Chemistry journal article supplement (doi:10.1039/d2cc05058g), 2022-01-01
Supplement: d2cc05058g1.pdf [file d2cc05058g1.pdf]

# Supplementary Information

## Unexpected triaxial preferences in some all-*syn* 1,3,5- trifluorocyclohexanes

Cihang Yu,<sup>a</sup> Bruno A. Piscelli,<sup>b</sup> Nawaf Al Maharik,<sup>c</sup> David B. Cordes,<sup>a</sup> Alexandra M. S. Slawin,<sup>a</sup> Rodrigo A. Cormanich,<sup>\*b</sup> David O'Hagan<sup>\*a</sup>

### Index:

|                                       |         |
|---------------------------------------|---------|
| Material and methods                  | Page 2  |
| Images of NMR Spectra                 | Page 8  |
| Details of X-Ray Diffractions data    | Page 23 |
| Details of Computational Calculations | Page 26 |

# Material and Methods

All reactions were carried out under argon atmosphere with standard Schlenk techniques unless otherwise specified. The reaction glassware were oven dried and cooled under vacuum. Commercially available chemicals were purchased from Acros, Alfa Aeser, Fisher Scientific, Fluorochem, Sigma Aldrich, Strem Chemicals, and TCI (UK) and used as received unless otherwise stated. Anhydrous solvent such as DCM, diethyl ether, THF, toluene and hexane were dried in solvent purification system (Mbraun MB SPS-200).

The hydrogenation reactions were performed in a steel high pressure autoclave at the indicated pressure and temperature. The reaction mixture was loaded onto a dry microwave or glass vessel tube equipped with a cross magnetic stirring bar and transferred to the Autoclave under argon. *In vacuo* refer to the use of rotary evaporator with membrane pump to 30-50 mbar at 40 °C unless otherwise stated.

<sup>1</sup>H, <sup>13</sup>C and <sup>19</sup>F NMR spectra were recorded on Bruker AVIII-HD 700 Hz with Cryo Probe Prodigy TCI (<sup>1</sup>H, 700 MHz, <sup>13</sup>C, 176 MHz, <sup>19</sup>F, 659 MHz), Bruker AVIII 500 Hz with Cyro Probe Prodigy BBO or Bruker AVIII-HD 500 Hz with SmartProbe BBFO+ (500 MHz <sup>1</sup>H, 125 MHz <sup>13</sup>C, and 470 MHz for <sup>19</sup>F) or Bruker AV 400 Hz with BBFO probe (400 MHz <sup>1</sup>H, 100 MHz <sup>13</sup>C, 161 MHz and 376 MHz for <sup>19</sup>F). NMR analyses were carried out at room temperature in indicated deuterated solvents unless otherwise noted. Chemical shifts data were reported as  $\delta$  units of ppm corrected by solvent residue peak and coupling constants, *J*, are reported in Hz. Multiplicities are indicated by: s for singlet, d for doublet, t for triplet, q for quartet and m for multiplet and br. for broad band. Analytical thin layer chromatography was carried out on aluminium backed Merck TLC silica gel 60 F<sub>254</sub> plates. These plates were visualised using UV light at 254 nm wavelength, dyed by potassium permanganate or phosphomolybdic acid followed by heating. Flash column chromatography performed with Sigma-Aldrich silica gel, 60 Å pore size and 230-400 mesh, 40-63  $\mu$ m particle size under 5-10 psi compressed air. Melting points were measured on a Griffin electric thermal melting point apparatus with thermometer and reading are uncorrected. Mass spectra measurements were carried by University of St Andrews Mass Spectrometer Facility using ESI.

## Catalyst synthesis

The preparation of Rh(CAAC)(COD)Cl following the reported literature<sup>1</sup> with modification. Commercially available ligand (CAAC) $\cdot$ 2HCl was used instead of synthetic carbene salt (CAAC)HCl therefore an additional equivalent of base was added.

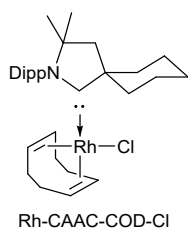

[Rh(COD)Cl]<sub>2</sub> precursor (161 mg, 0.326 mmol, 0.5 eq.), carbene salt of CAAC·2HCl and KHMDS was added to a Schlenk tube in glove box under nitrogen atmosphere, Dry THF (15 ml) were added dropwise over 10 min to the vigorous stirring solid/suspension mixture. The suspension was stirred for another 10 min at -78, after which the cooling dry ice/acetone bath is removed. After stirring for 16 h at r.t., the reaction mixture is filtered, the residue was washed with THF (10 ml), concentrated and dried under high vacuum. The product was dissolved in diethyl ether, adsorbed onto silica gel and purified by column chromatography (pentane: diethyl ether 19:1). After evaporation of the solvent, the complex was titrated from a concentrated DCM solution with pentane to yield desired complex as yellow powder. Yield 55 %. <sup>1</sup>H NMR (400 MHz, CDCl<sub>3</sub>): δ = 7.45–7.37 (m, 2H) · 7.14 (dd, *J* = 1.6, 6.4 Hz, 1H) · 5.24 (t, *J* = 7.2 Hz, 1H), 4.60 (q, *J* = 8.0 Hz, 1H), 3.92–3.86 (m, 1H), 3.45–3.43 (m, 1H), 2.92–2.84 (m, 2H), 2.63–2.45 (m, 3H), 2.28–2.25 (m, 1H), 2.14–2.11 (m, 1H), 2.01–1.92 (m, 3H), 1.78–1.73 (m, 7H), 1.58–1.55 (m, 2H), 1.49 (s, 3H), 1.44–1.35 (m, 3H), 1.26–1.22 (m, 9H), 1.19 (s, 3H), 0.94 (d, *J* = 6.8 Hz, 3H). The <sup>1</sup>H NMR match to literature value<sup>1</sup>.

## General reaction conditions for arene hydrogenation

Fluoroarene substrate (1 mmol), oven dried silica/ 4Å MS (1g), Rhodium CAAC catalyst (1 mmol %) and dry hexane (10ml) were added under argon to a 100 ml glass tube vessel. The reaction vessel was placed in a 150 ml stainless steel autoclave. The autoclave was pressurised and de-pressurised with 5 bar hydrogen three times before being charged to 50 bar of hydrogen. The reaction mixture was stirred at room temperature for 24 h, after which the autoclave was de-pressurised. The reaction mixture was flushed with DCM, acetone or methanol onto silica, dried and submitted to column chromatography.

### All-*cis*-1,2,3,4,5-pentafluorocyclohexane (**3**)

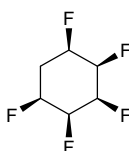

Product **3** was prepared by the standard hydrogenation method. The crude product was directly submitted to column chromatography with DCM to generate **3** as a white solid (39 % yield). M.p. 150-152 °C

$^1\text{H}$  NMR (318 K, 500 MHz, Methanol- $d_4$ )  $\delta$  5.05 (dt,  $J = 51.5, 11.9$  Hz, 1H), 4.86 – 4.67 (m, 1H), 2.49 (h,  $J = 10.2$  Hz, 1H), 2.33 – 2.20 (m, 1H).  $^{19}\text{F}$  NMR (213 K, 470 MHz, Methanol- $d_4$ )  $\delta$  -200.9 – -201.1 (m), -213.2 (t,  $J = 12.0$  Hz), -219.32 (ddd,  $J = 12.0, 7.1, 4.8$  Hz). Data matched the literature<sup>1</sup>.

#### All-*cis*-1,2,3,5-tetrafluorocyclohexane (4)

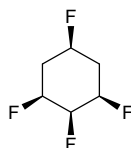

Product **4** was prepared by the standard hydrogenation method. The crude product was directly submitted to column chromatography (DCM/Pentane). A white solid (65% yield) was recovered after concentrated *in vacuo*. M.p. 84-86 °C.

$^1\text{H}$  NMR (500 MHz, Chloroform- $d$ )  $\delta$  5.06 (dtd,  $J = 54.3, 10.4, 2.1$  Hz, 1H), 4.71 – 4.22 (m, 3H), 2.44 (dt,  $J = 11.9, 6.0$  Hz, 2H), 2.35 – 2.09 (m, 2H).  $^{19}\text{F}$  NMR (471 MHz, Chloroform- $d$ )  $\delta$  -183.9 (dd,  $J = 46.7, 8.8$  Hz), -197.0 (ddd,  $J = 44.9, 15.6, 8.2$  Hz), -216.1 – -218.2 (m).  $^{13}\text{C}$  NMR (126 MHz, Chloroform- $d$ )  $\delta$  87.53 (dt,  $J = 188.0, 17.9$  Hz), 86.20 – 82.84 (m, overlapped), 32.10 (td,  $J = 21.4, 3.9$  Hz).

Mass FTMS +P ESI [M+Na] observed 179.0453 calculated as 179.0455.

#### All-*cis*-1,3,5-trifluorocyclohexane (5)

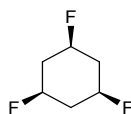

Product **5** was prepared by the standard hydrogenation method. The crude product was directly submitted to a column chromatography (DCM/Pentane) and the product was recovered in 60 % yield as a white solid. M.p. 90 °C.

$^1\text{H}$  NMR (500 MHz, Methylene Chloride- $d_2$ )  $\delta$  4.58 (dtt,  $J = 45.8, 8.5, 3.7$  Hz, 3H), 2.56 – 2.23 (m, 3H), 1.89 (h,  $J = 11.1$  Hz, 3H).  $^{19}\text{F}$  NMR (471 MHz, Methylene Chloride- $d_2$ )  $\delta$  -181.4 (dp,  $J = 48.2, 12.6$  Hz).  $^{13}\text{C}$  NMR (126 MHz, Chloroform- $d$ )  $\delta$  85.1 (dt,  $J = 176.0, 14.9$  Hz), 37.8 (t,  $J = 20.0$  Hz). All spectra and m.p match to the literature<sup>1</sup>.

**(1*R*,2*s*,3*S*,5*r*)-1,3,5-Trifluoro-2-(trifluoromethyl) cyclohexane (6)**

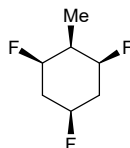

Product **6** was prepared by the standard hydrogenation method. The crude product was directly submitted to column chromatography with DCM/Pentane. Yield 88%. M.p.88-90 °C

<sup>1</sup>H NMR (500 MHz, Chloroform-*d*) δ 4.68 (dddt, *J* = 50.1, 46.3, 7.3, 3.2 Hz, 3H), 2.47 – 2.28 (m, 2H), 2.24 – 1.91 (m, 3H), 1.20 (d, *J* = 7.1 Hz, 3H). <sup>19</sup>F NMR (470 MHz, CDCl<sub>3</sub>) δ -179.2, -192.0. <sup>13</sup>C NMR (126 MHz, Chloroform-*d*) δ 88.2 (d, *J* = 180.6 Hz), 84.9 (d, *J* = 175.3 Hz), 37.5 (t, *J* = 19.6 Hz), 34.8 – 33.3 (m), 10.1. FTMS + P ESI observed [M+Na] 175.0703, calculated 175.0711

**(1*R*,2*s*,3*S*,5*r*)-1,3,5-Trifluoro-2-methoxycyclohexane (7)**

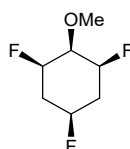

Product **10** was prepared by the standard hydrogenation method. The crude product is directly submitted to column chromatography with DCM/Pentane. The product was isolated as a colourless oil (Yield 47 %). The compound was cooled to -20 °C in a freezer for crystallisation.

<sup>1</sup>H NMR (500 MHz, Acetone-*d*<sub>6</sub>) δ 4.83 – 4.49 (m, 3H), 3.96 (td, *J* = 9.6, 2.5 Hz, 1H), 3.54 (s, 3H), 2.31-2.23 (m, 2H), 2.16 – 2.01 (m, 2H). <sup>19</sup>F NMR (470 MHz, Acetone) δ -183.1, -195.7. <sup>13</sup>C NMR (126 MHz, Acetone-*d*<sub>6</sub>) δ 88.2 (ddd, *J* = 181.4, 17.1, 13.0 Hz), 85.6 (dt, *J* = 173.4, 18.0 Hz), 78.9 (t, *J* = 17.0 Hz), 60.7, 55.1, 33.2 (t, *J* = 21.0 Hz). FTMS + P ESI observed [M+Na] 191.0652, calculated 191.0660

***N*-((1*s*,2*R*,4*r*,6*S*)-2,4,6-trifluorocyclohexyl) acetamide (9)**

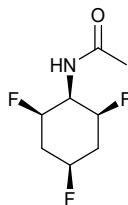

Product **9** was prepared by the standard hydrogenation method using 2 mmol % of catalyst, hexane (14 ml) and silica (1 g) per 1 mmol substrate. The reaction time was extended to 3 days. The compound was purified over silica gel (acetone/DCM) and recrystallized in hot toluene to afford colourless needles (18 % yield. M.p. 126-130 °C).

$^1\text{H}$  NMR (700 MHz, Toluene- $d_8$ )  $\delta$  4.36 (overlapped, br, 2H), 4.16 (d,  $J = 47.7$  Hz, 1H), 3.90 – 3.54 (m, 2H), 1.74 (d,  $J = 11.5$  Hz, 3H), 1.12 (m, 2H), 0.77 (m, 2H).

$^{19}\text{F}$  NMR (659 MHz, Toluene- $d_8$ )  $\delta$  -179.8, -196.2.  $^{13}\text{C}$  NMR (176 MHz, Tol)  $\delta$  88.3, 89.2, 84.9, 85.7, 47.8, 33.0, 24.94, 33.0 FTMS + P ESI Calculated ESI[M+Na] 218.0763 observed 218.0755.

***tert*-Butyl ((1*s*,2*R*,4*r*,6*S*)-2,4,6-trifluorocyclohexyl) carbamate (10)**

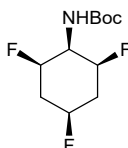

Aryl hydrogenation to generate **10** was carried out with 4 Å MS and a hydrogenation for 3 days. The product was purified over silica gel (acetone/DCM) and dried *in vacuo* to afford a white fibrous solid (40% yield, M.p. 160-162 °C (sub.)).

$^1\text{H}$  NMR (500 MHz, Acetone- $d_6$ )  $\delta$  6.08 (s, 1H), 4.85 (ddt,  $J = 44.0, 23.8, 4.3$  Hz, 4H), 4.05 (tdt,  $J = 26.5, 9.7, 3.3$  Hz, 1H), 2.50 – 2.39 (m, 2H), 2.29 – 2.10 (m, 3H), 1.44 (s, 9H,  $^t\text{Bu}$ ).  $^{19}\text{F}$  NMR (470 MHz, Acetone- $d_6$ )  $\delta$  -178.5, 1F, -195.3.  $^{13}\text{C}$  NMR (126 MHz, Acetone- $d_6$ )  $\delta$  88.2 (d,  $J = 180.6$  Hz), 85.3 (dt,  $J = 174.0, 4.4$  Hz), 79.6, 52.2 (t,  $J = 17.6$  Hz), 34.4 (ddd,  $J = 20.3, 13.0, 7.0$  Hz), 28.6.

FTMS + P ESI observed [M+Na] 276.1179, calculated 276.1187.

**tert-Butyl ((1*s*,2*R*,6*S*)-2,6-difluorocyclohexyl) carbamate (**12**)**

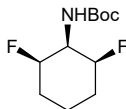

Rhodium catalyst (7 mg), tert-butyl (2,6-difluorophenyl) carbamate (0.2 g, 1 mmol) and activated 4 Å MS (250 mg) in a hexane (15 mL) solution were stirred under a hydrogen atmosphere under reduced pressure at 40 °C for 2 days. The product was purified by column chromatography (pentane/dichloromethane 1:1 to dichloromethane/acetone 98:2) to give **12** (73 mg, 31% yield) as a white solid; m.p. = 92-93 °C;

<sup>1</sup>H NMR (400 MHz, Chloroform-*d*) δ 5.37 (d, *J* = 9.1 Hz, 1H, NH), 4.79 (d, *J* = 47.2 Hz, 2H, CHF), 3.66 (td, *J* = 33.2, 9.7 Hz, 1H, CHN), 2.28 – 2.09 (m, 2H), 1.88 (qt, *J* = 13.5, 3.9 Hz, 1H), 1.65 – 1.48 (m, 2H), 1.45 (9H, s) 1.44 (d, *J* = 12.1 Hz). <sup>19</sup>F NMR (376 MHz, Chloroform-*d*) δ -198.1. <sup>13</sup>C NMR (101 MHz, CDCl<sub>3</sub>) δ 155.5, 90.4 (d, *J* = 174.7 Hz), 80.2, 52.0 (t, *J* = 17.0 Hz), 29.8 (dd, *J* = 12.6, 8.3 Hz), 28.5, 13.2. HRMS (EI, +ve) *m/z* calculated for C<sub>11</sub>H<sub>19</sub>NO<sub>2</sub>F<sub>2</sub>Na [M+Na]<sup>+</sup> 258.1282, found 258.1272.

# Images of NMR Spectra

## all-cis-1,2,3,4,5-pentafluorocyclohexane (3)

$^1\text{H}$  NMR (500 MHz, Methanol- $d_4$ )

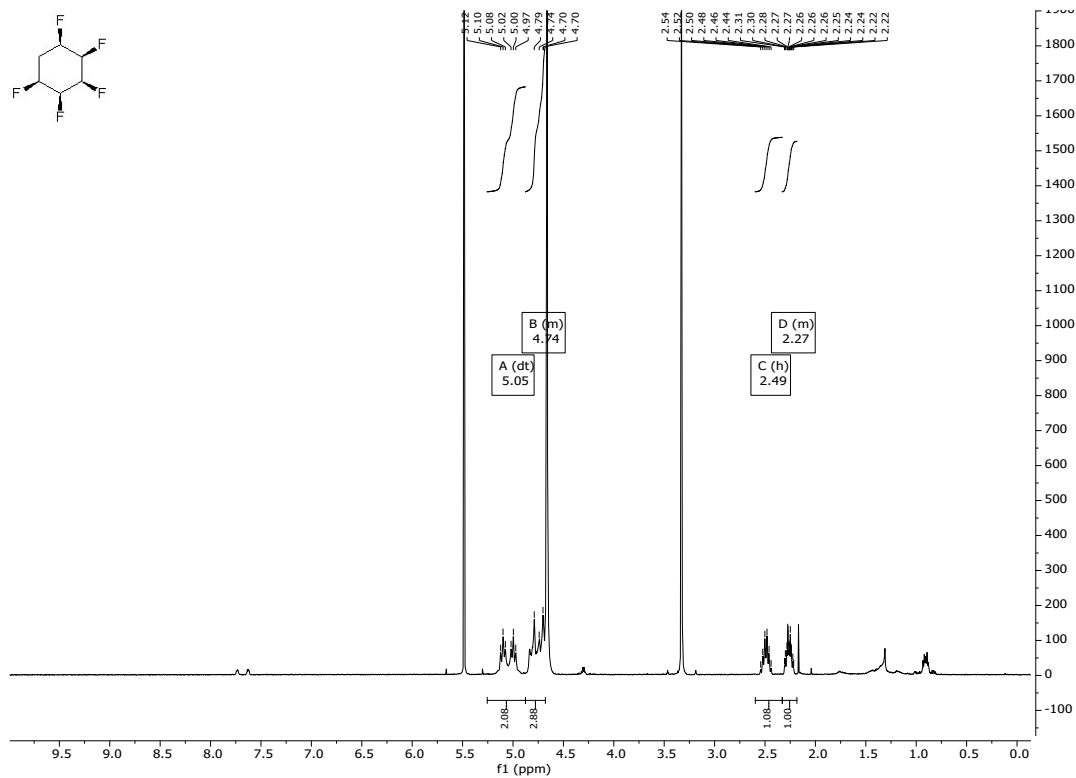

$^{19}\text{F}$  NMR (470 MHz, Methanol- $d_4$ )

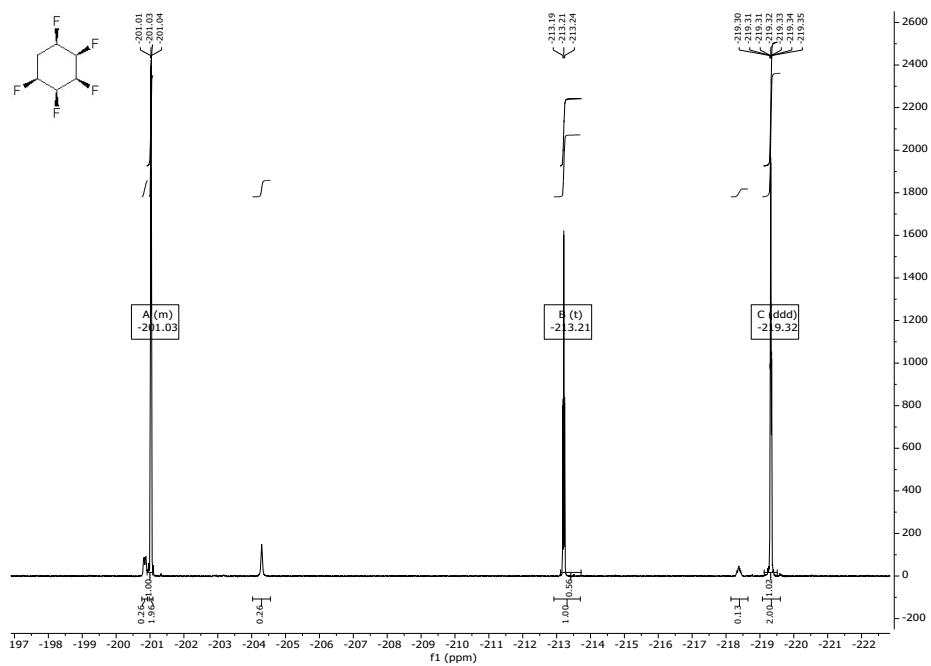





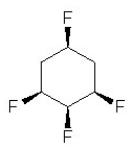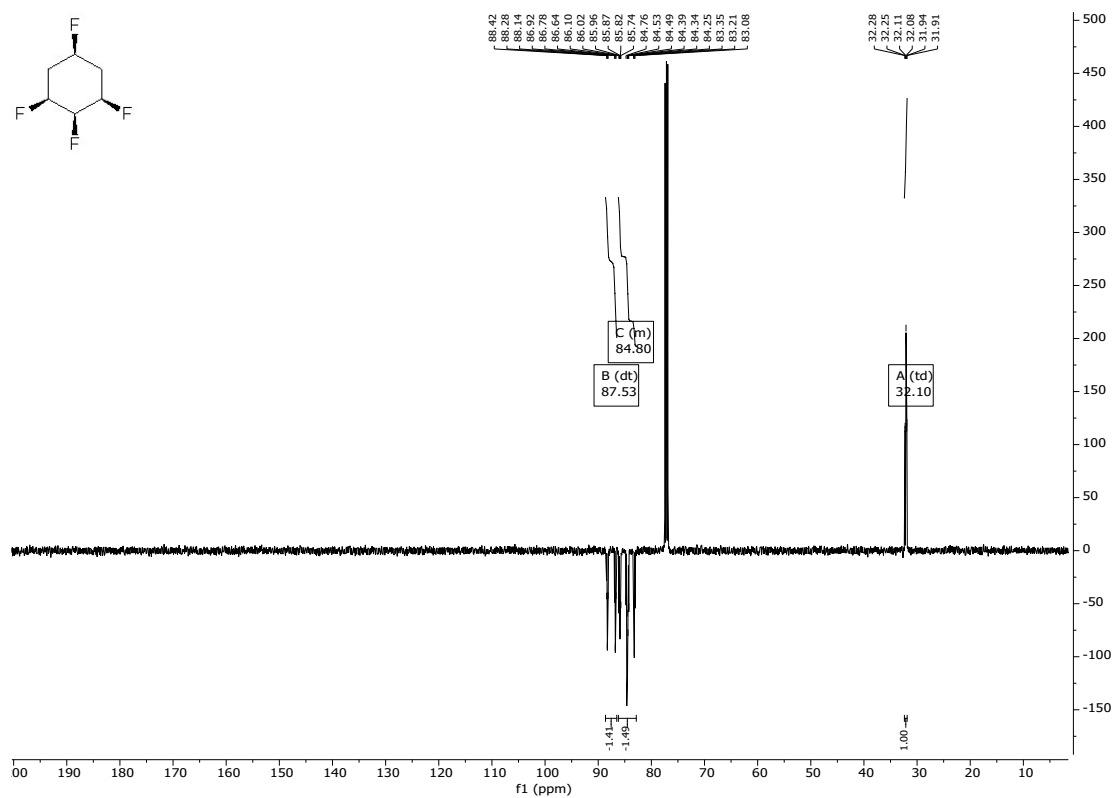

2D  $^1\text{H}$ ,  $^{13}\text{C}$ -gs-HMBC,  $\text{CDCl}_3$

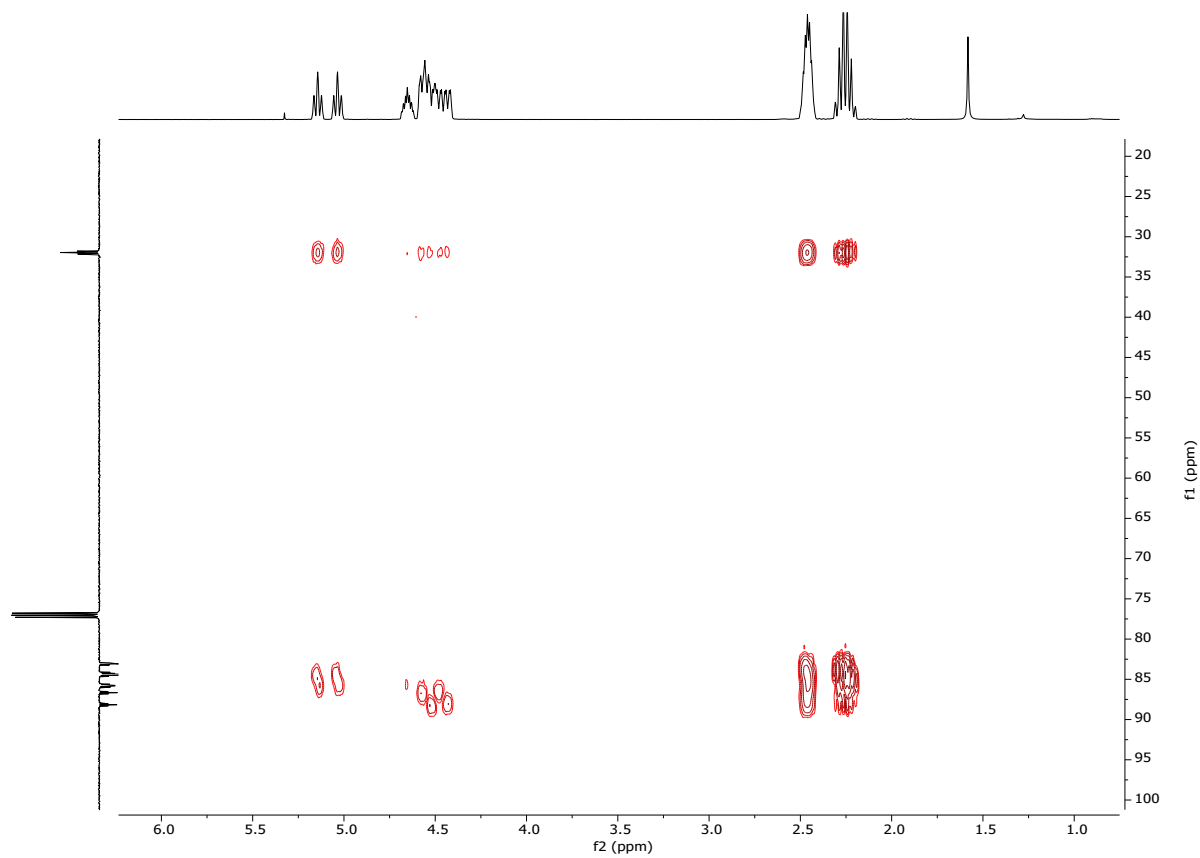

2D  $^1\text{H}$ ,  $^{13}\text{C}$ -gs-HSQC with multiplicity editing

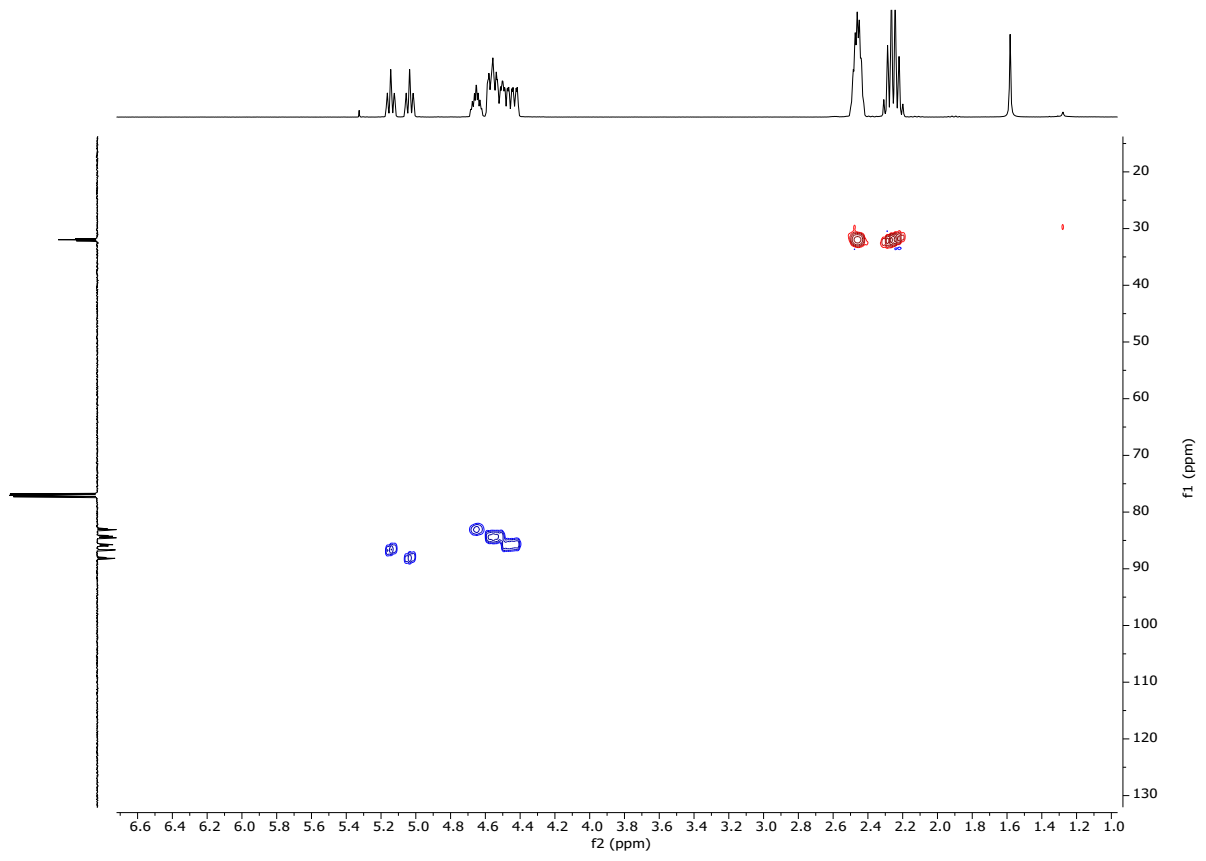

# all-*cis*-1,3,5-trifluorocyclohexane (5)

$^1\text{H}$  NMR (500 MHz, Methylene Chloride- $d_2$ )

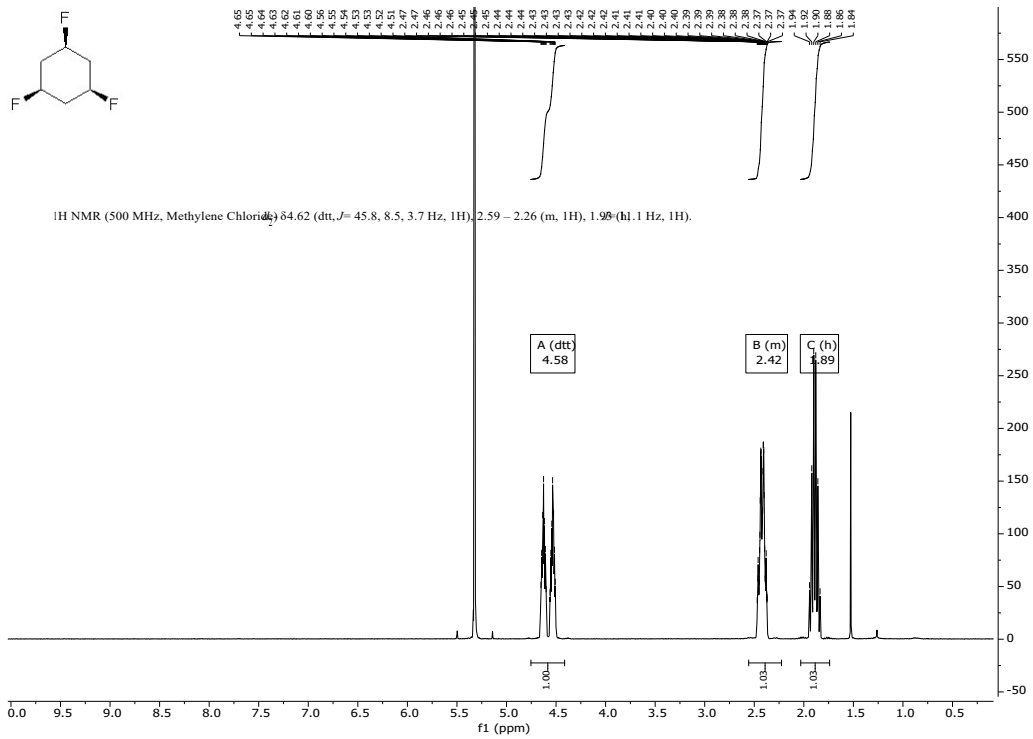

$^{19}\text{F}$  NMR (471 MHz, Methylene Chloride- $d_2$ )

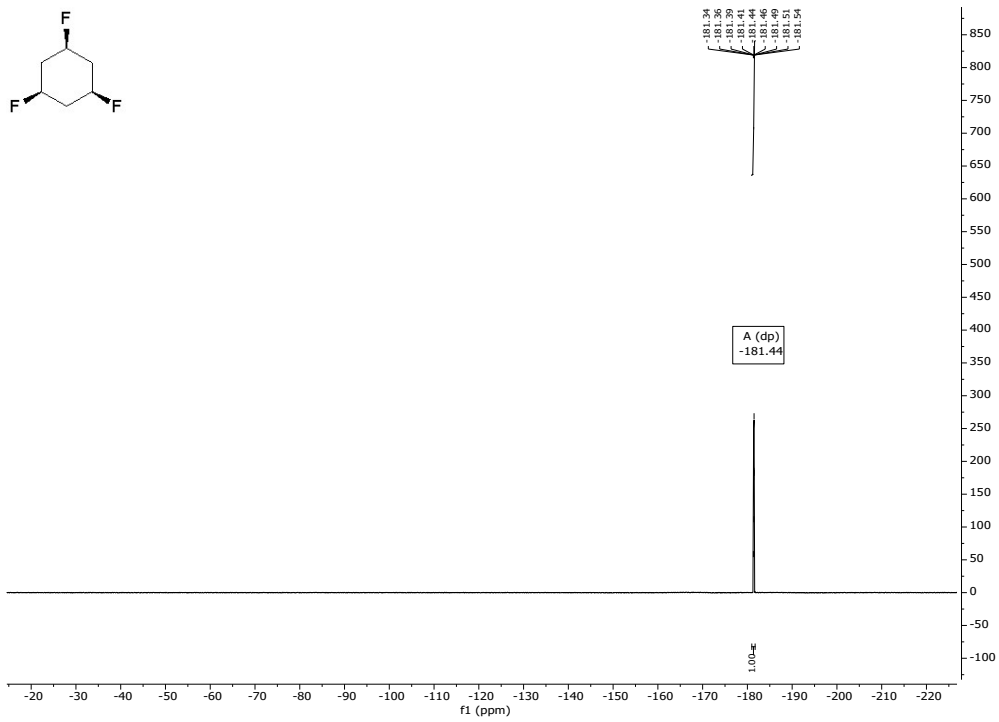

$^{13}\text{C}$  NMR (126 MHz, Chloroform- $d$ )

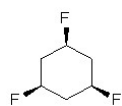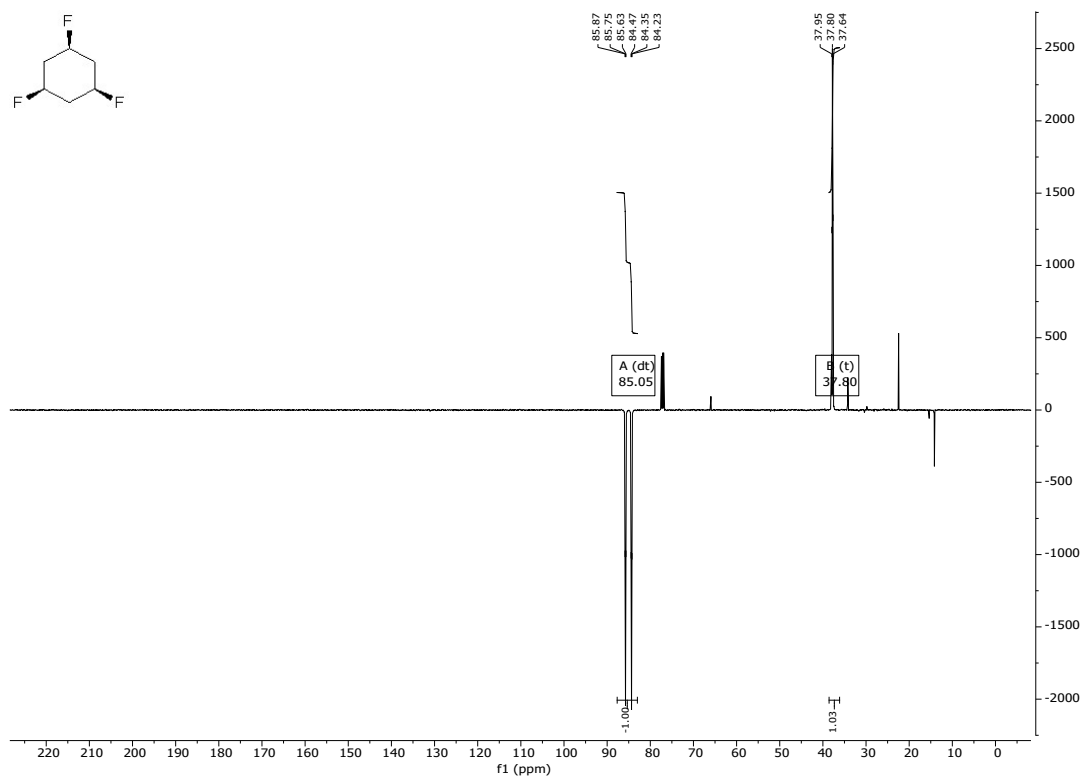

**(1*R*,2*s*,3*S*,5*r*)-1,3,5-trifluoro-2-(trifluoromethyl) cyclohexane (6)**

<sup>1</sup>H NMR (500 MHz, Chloroform-*d*)

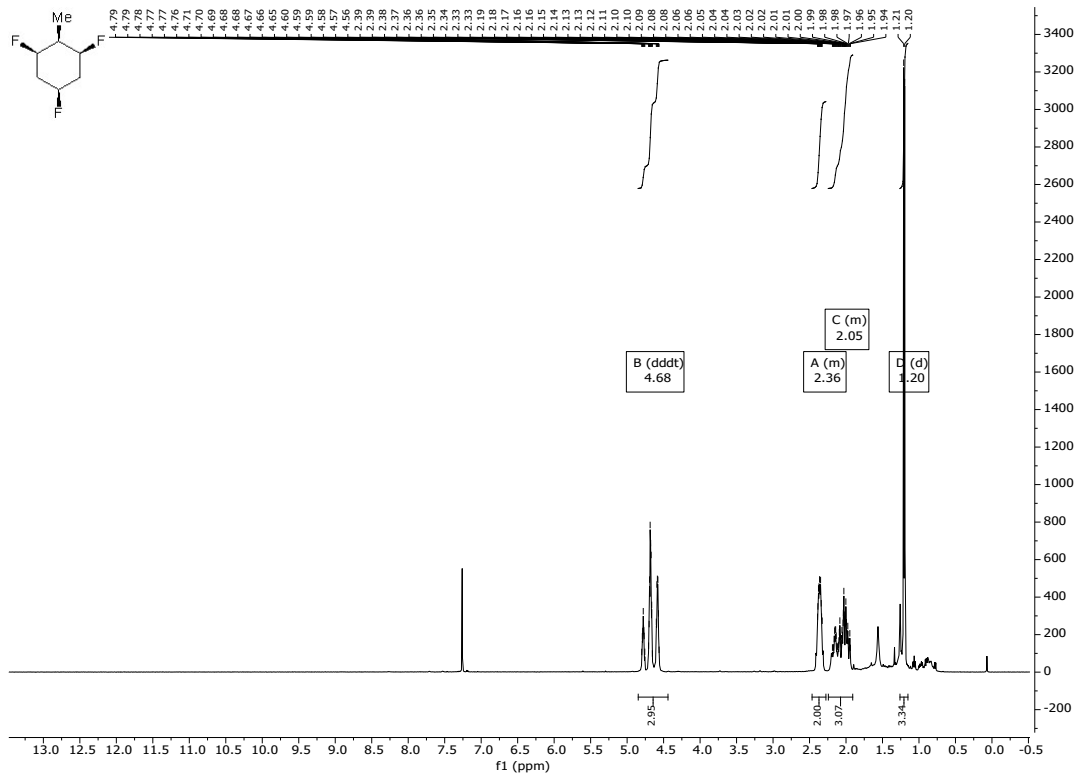

<sup>19</sup>F NMR (470 MHz, CDCl<sub>3</sub>)

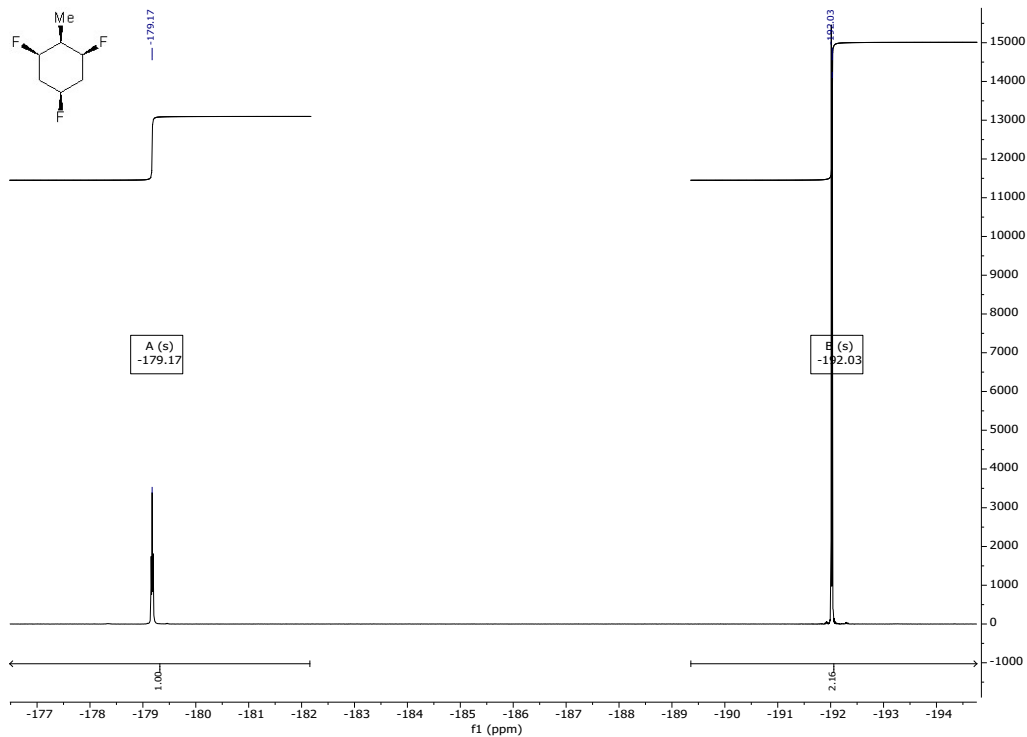

$^{13}\text{C}$  NMR (126 MHz, Chloroform-*d*)

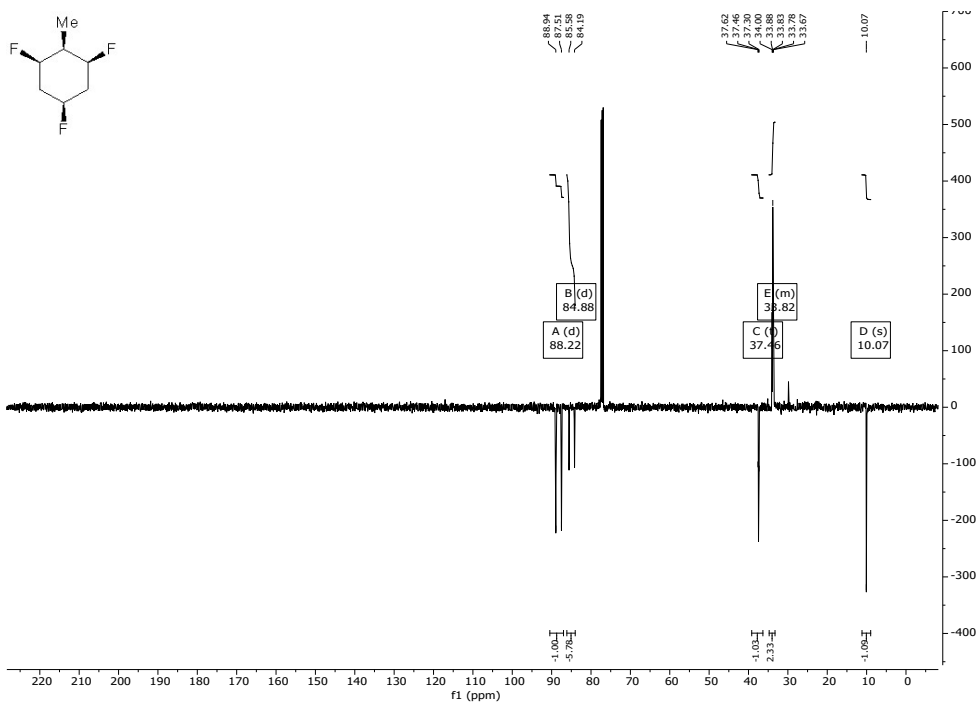

**(1*R*,2*s*,3*S*,5*r*)-1,3,5-trifluoro-2-methoxycyclohexane (7)**

<sup>1</sup>H NMR (500 MHz, Acetone-*d*<sub>6</sub>)

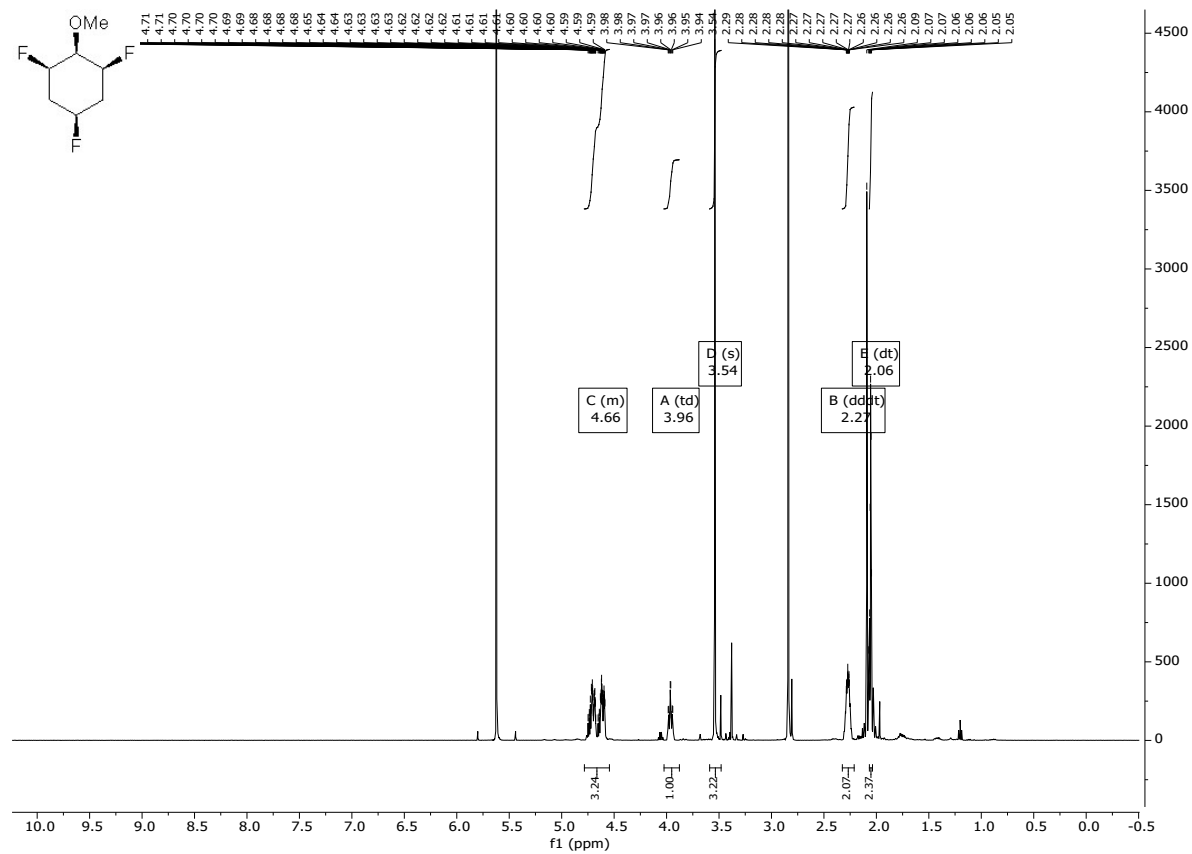

<sup>19</sup>F NMR (470 MHz, Acetone)



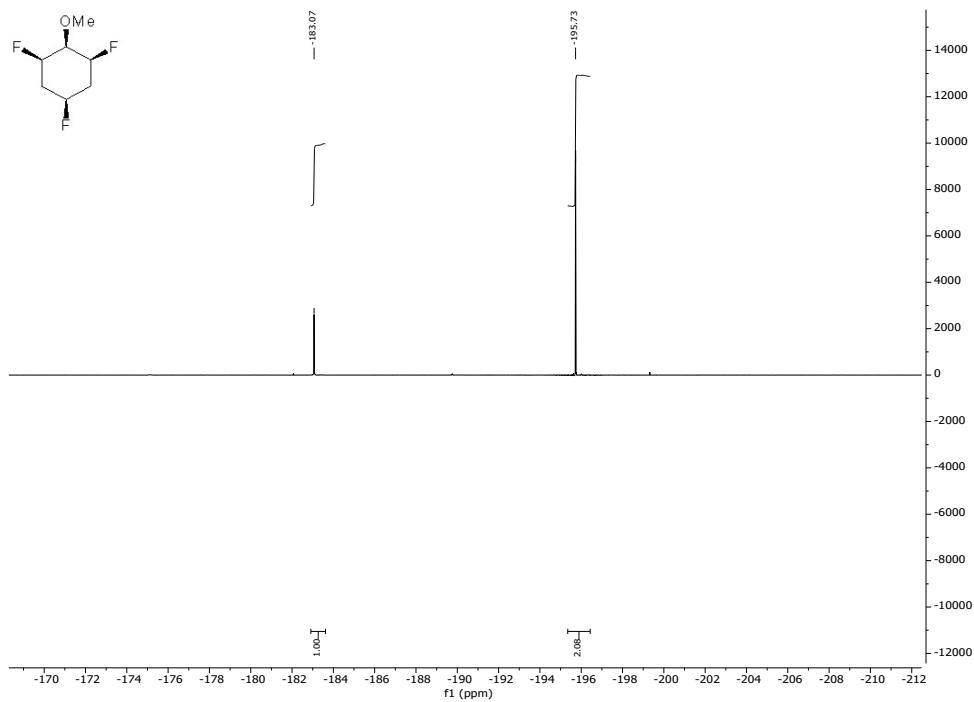

$^{13}\text{C}$  NMR (126 MHz, Acetone- $d_6$ )

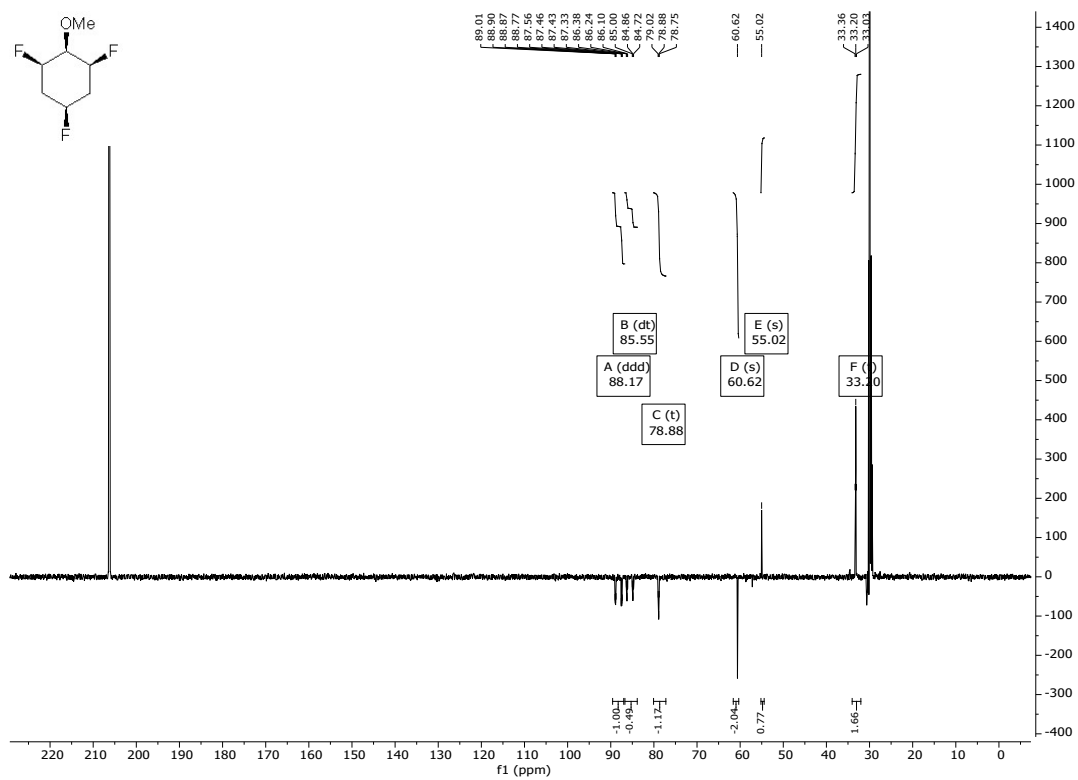

***N*-((1*s*,2*R*,4*r*,6*S*)-2,4,6-trifluorocyclohexyl) acetamide (9)**

<sup>1</sup>H NMR (700 MHz, Toluene-*d*<sub>8</sub>)

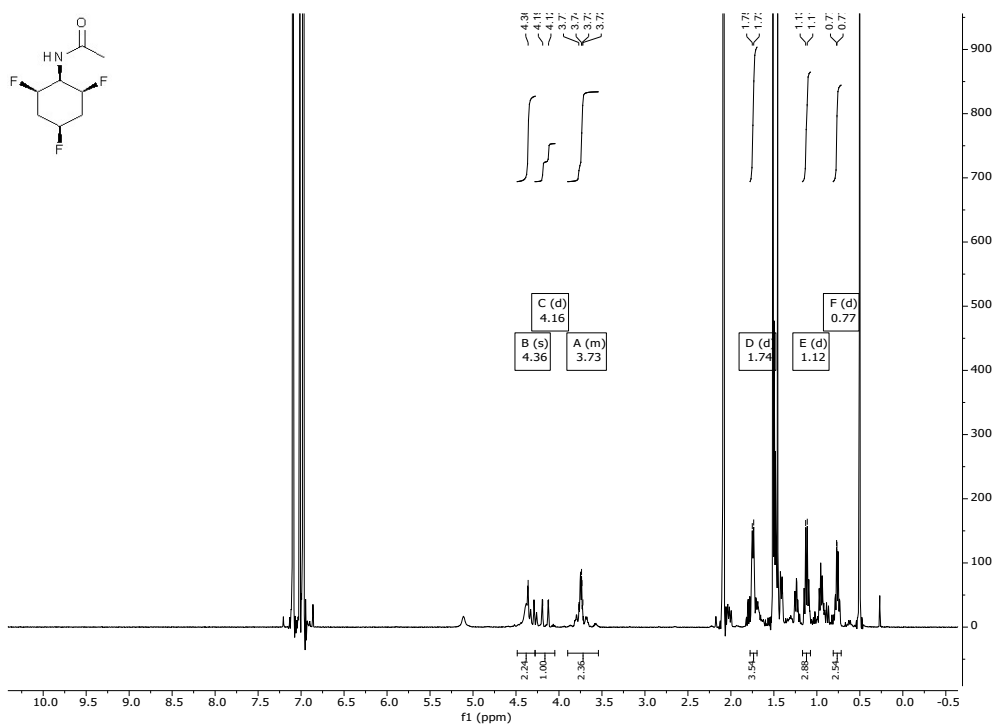

<sup>19</sup>F NMR (659 MHz, Toluene-*d*<sub>8</sub>) δ -179.77 (qd, *J* = 44.6 Hz, 13.3 Hz, 2F), -196.20 (s, 1F).

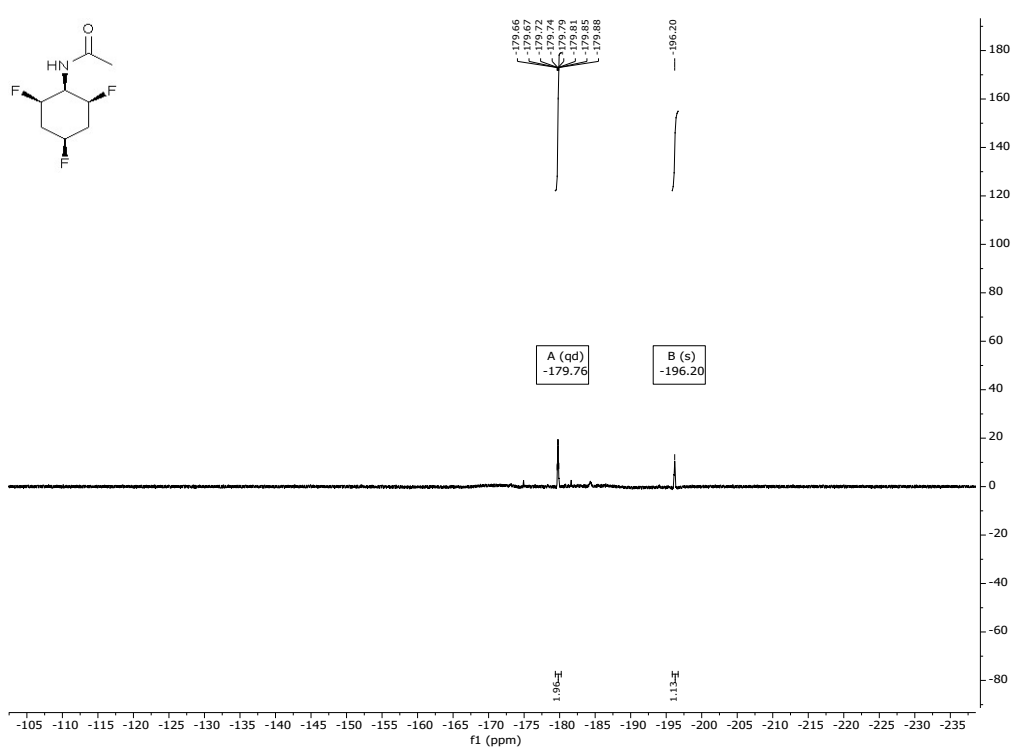

2D  $^1\text{H}$ - $^{13}\text{C}$ -gs-HSQC with multiplicity editing  
 $^{13}\text{C}$  NMR (176 MHz, Tol)  $^1\text{H}$  NMR (700 MHz, Tol)

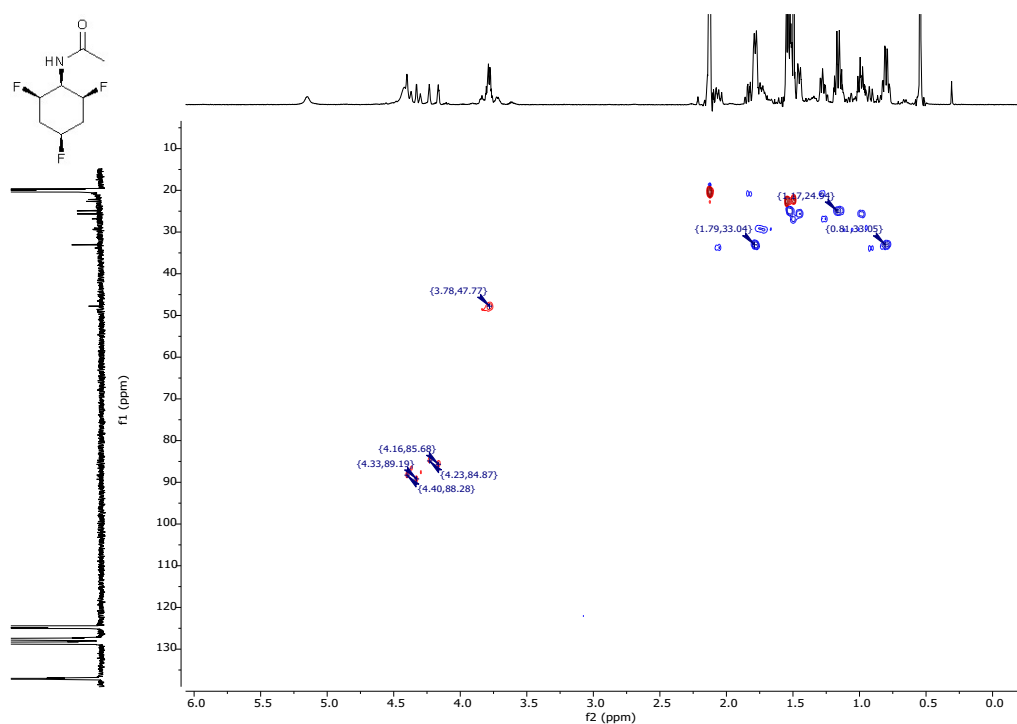

**tert-butyl ((1s,2R,4r,6S)-2,4,6-trifluorocyclohexyl) carbamate (10)**

$^1\text{H}$  NMR (500 MHz, Acetone- $d_6$ )

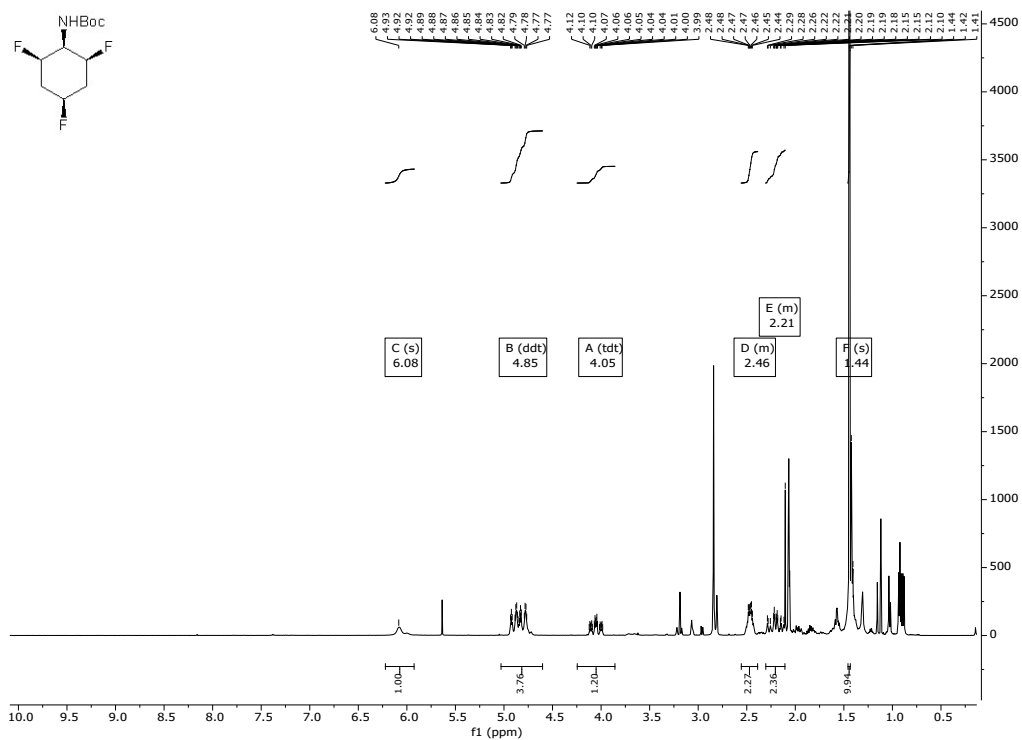

<sup>19</sup>F NMR (470 MHz, Acetone-*d*<sub>6</sub>)

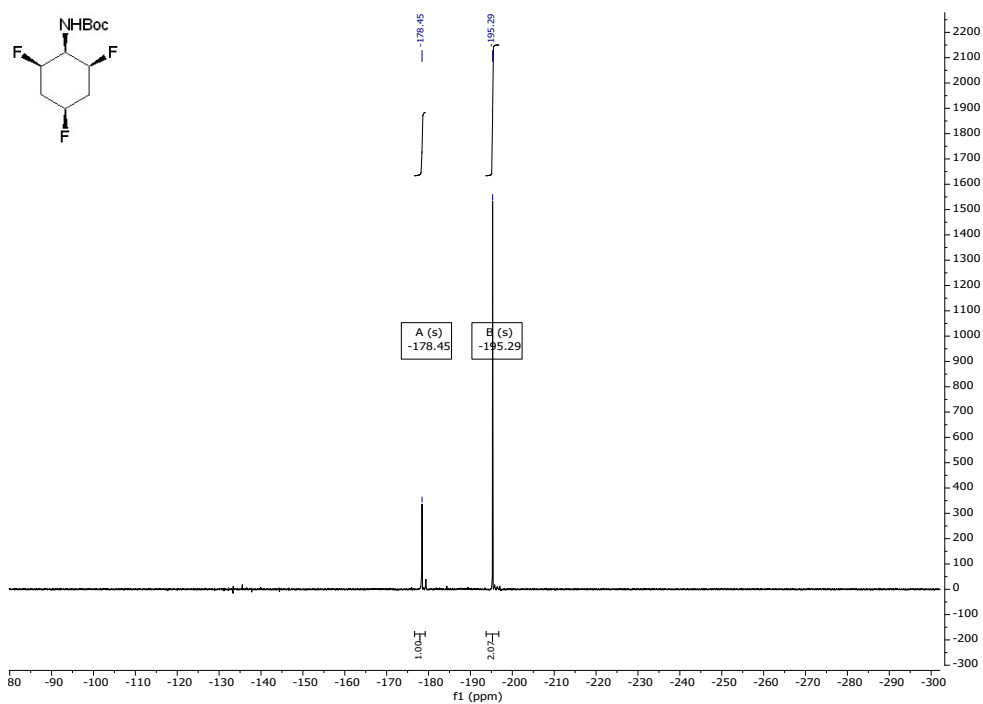

<sup>13</sup>C NMR (126 MHz, Acetone-*d*<sub>6</sub>)

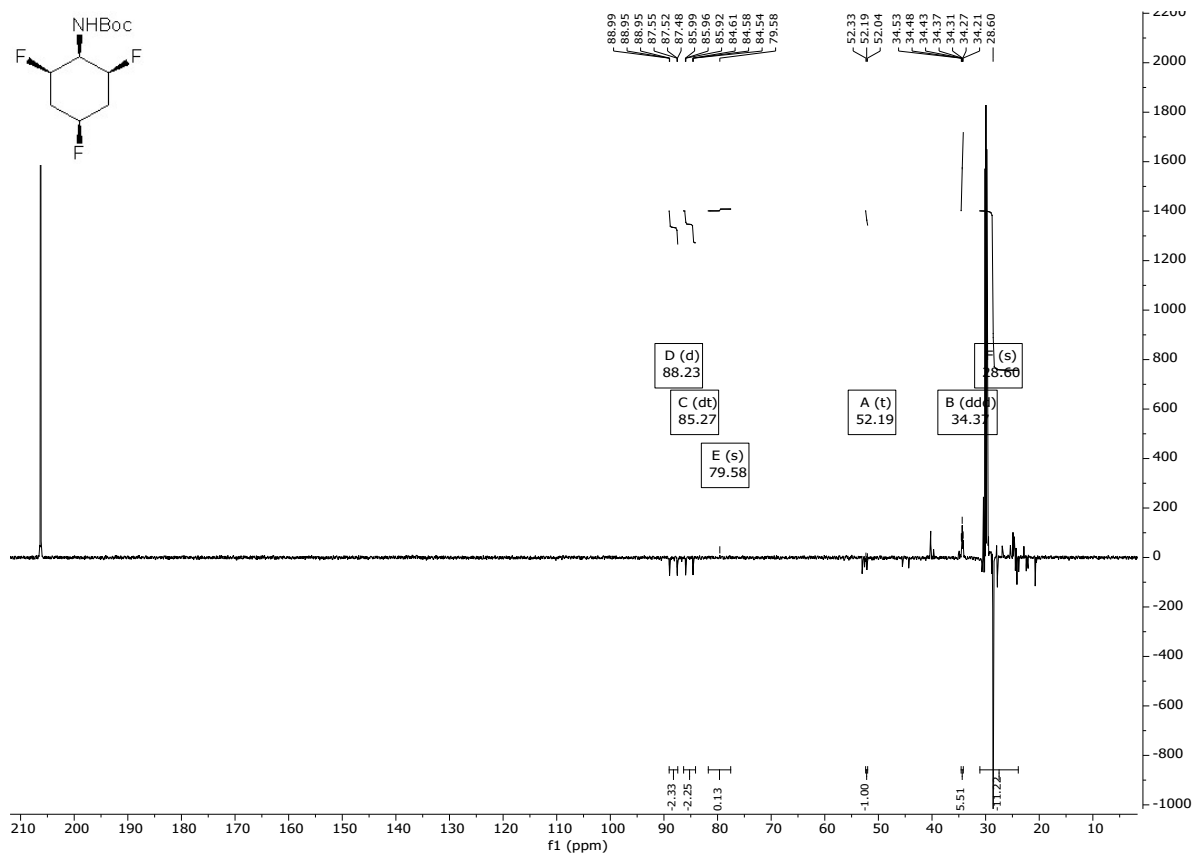

tert-butyl ((1*s*,2*R*,6*S*)-2,6-difluorocyclohexyl) carbamate (12)

<sup>1</sup>H NMR (500 MHz, Chloroform-*d*)

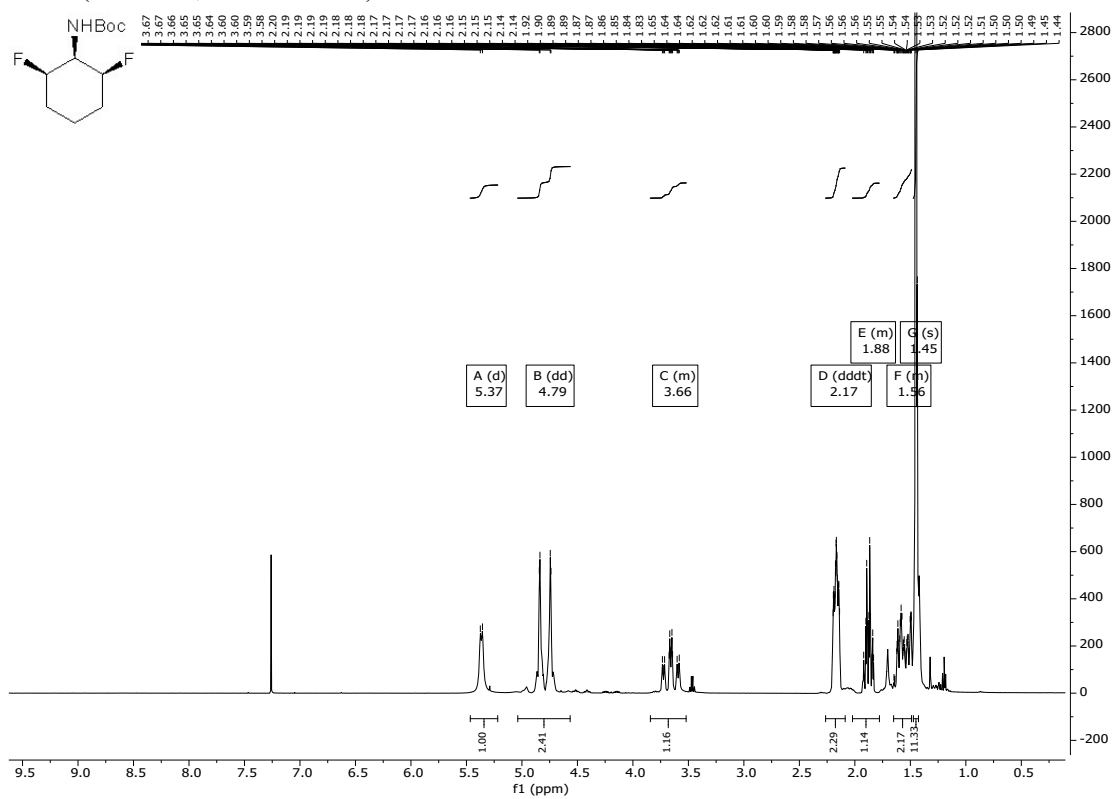

<sup>19</sup>F NMR (470 MHz, Chloroform-*d*)

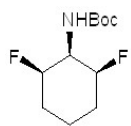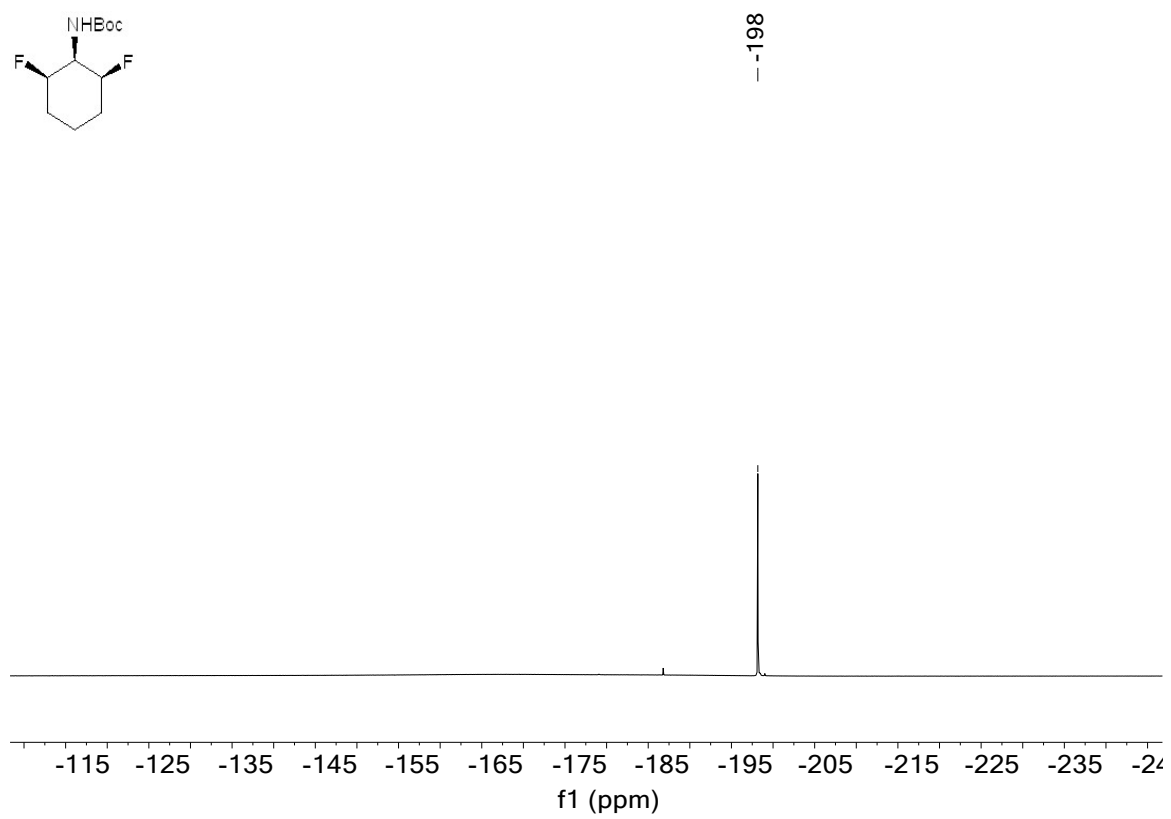

$^{13}\text{C}$  NMR (101 MHz,  $\text{CDCl}_3$ )

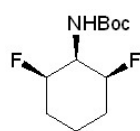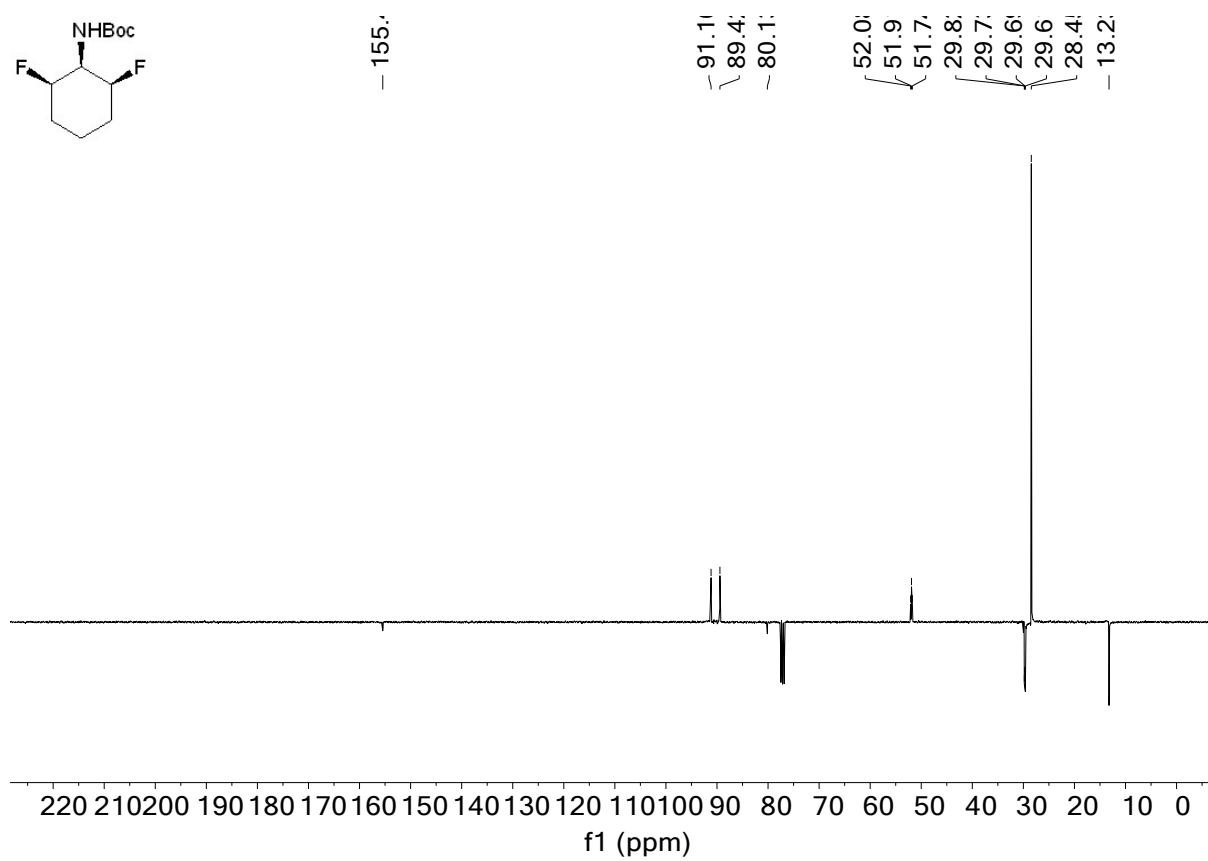

### Reference

1. M. P. Wiesenfeldt, Z. Nairoukh, W. Li, F. Glorius, *Science*, **2017**, 357, 908-912.

## Details of X-ray diffraction data

X-ray diffraction data for compounds **5** and **10** were collected using a Rigaku MM-007HF High Brilliance RA generator/confocal optics with XtaLAB P100 diffractometer [Cu K $\alpha$  radiation ( $\lambda = 1.54187 \text{ \AA}$ )]. Diffraction data for compound **9** were collected using a Rigaku MM-007HF High Brilliance RA generator/confocal optics with XtaLAB P200 diffractometer [Cu K $\alpha$  radiation ( $\lambda = 1.54187 \text{ \AA}$ )]. Data for compounds **6**, **7** and **12** were collected using a Rigaku FR-X Ultrahigh Brilliance Microfocus RA generator/confocal optics with XtaLAB P200 diffractometer [Mo K $\alpha$  radiation ( $\lambda = 0.71073 \text{ \AA}$ )]. Intensity data were collected using either both  $\omega$  and  $\phi$  steps or just  $\omega$  steps accumulating area detector images spanning at least a hemisphere of reciprocal space. Data for all compounds analysed were collected using CrystalClear<sup>1</sup> and processed (including correction for Lorentz, polarization and absorption) using CrysAlisPro.<sup>2</sup> Structures were solved by dual space (SHELXT<sup>3</sup>) or direct methods (SIR2011<sup>4</sup>) and refined by full-matrix least-squares against F<sup>2</sup> (SHELXL-2018/3<sup>5</sup>). Non-hydrogen atoms were refined anisotropically, and hydrogen atoms were refined using a riding model. Compounds **6** and **10** showed pseudo-merohedric and non-merohedric twinning, respectively. Several of the crystals showed poorer than ideal data, for a variety of reasons, however, in all cases the structure was clear, particularly when considered in conjunction with other analytical data. Compound **6** appeared to give slightly polycrystalline crystals that diffracted weakly at high angles, the best data available is presented. Even this data shows signs that the twin law does not fully account for the polycrystallinity, resulting in the slightly elevated value of  $R_{\text{int}}$ . Compound **9** showed particularly weak diffraction with severe loss of data at higher angles, as well as signs of polycrystallinity or twinning that could not successfully be modelled, leading to elevated values of  $R_{\text{int}}$ ,  $R_1$  and  $wR_2$ . In addition the relative sizes of thermal ellipsoids for the three fluorine atoms suggests possible discrepancies in their occupancies such that they could refine to a total of only two fluorine atoms across the three sites. This can however be discounted on the basis of the chemical knowledge of the sample from other analytical techniques. All crystals of compound **12** showed some degree of polycrystallinity that reduced diffraction intensity at high angles, the best available data is presented. This could not be successfully modelled as twinning, leading to slightly elevated values of  $R_1$  and  $wR_2$ . All calculations were performed using either the Olex2<sup>6</sup> interface. Selected crystallographic data are presented in Table S1. CCDC 2202377-2202382 contains the supplementary crystallographic data for this paper. These data can be obtained free of charge from The Cambridge Crystallographic Data Centre via [www.ccdc.cam.ac.uk/structures](http://www.ccdc.cam.ac.uk/structures).

## References for Crystallography

1. *CrystalClear-SM Expert* v2.1. Rigaku Americas, *The Woodlands, Texas, USA*, and Rigaku Corporation, *Tokyo, Japan*, 2015.
2. *CrysAlisPro* v1.171.39.8d, v1.171.40.14a, v1.171.41.93a, v1.171.42.38a. Rigaku Oxford Diffraction, Rigaku Corporation, *Oxford, U.K.*, 2015-2021.
3. Sheldrick, G. M. SHELXT – Integrated space-group and crystal structure determination. *Acta Crystallogr., Sect. A: Found. Adv.* **2015**, *71*, 3-8. doi: 10.1107/S2053273314026370
4. Burla, M. C.; Caliendo, R.; Camalli, M.; Carrozzini, B.; Cascarano, G. L.; Giacovazzo, C.;



- Mallamo, M.; Mazzone, A.; Polidori, G.; Spagna, R. SIR2011: a new package for crystal structure determination and refinement. *J. Appl. Crystallogr.* **2012**, *45*, 357-361. doi: 10.1107/S0021889812001124
5. Sheldrick, G. M. Crystal structure refinement with SHELXL. *Acta Crystallogr., Sect. C: Struct. Chem.* **2015**, *71*, 3-8. Doi: 10.1107/S2053229614024218
  6. Dolomanov, O. V.; Bourhis, L. J.; Gildea, R. J.; Howard, J. A. K.; Puschmann, H. OLEX2: a complete structure solution, refinement and analysis program. *J. Appl. Crystallogr.* **2009**, *42*, 339-341. doi: 10.1107/S0021889808042726

Table S1. Selected crystallographic data.

|                                                           | <b>5</b>                                     | <b>6</b>                                      | <b>7</b>                                       | <b>9</b>                                         | <b>10</b>                                                      | <b>12</b>                                                      |
|-----------------------------------------------------------|----------------------------------------------|-----------------------------------------------|------------------------------------------------|--------------------------------------------------|----------------------------------------------------------------|----------------------------------------------------------------|
| formula                                                   | C <sub>6</sub> H <sub>9</sub> F <sub>3</sub> | C <sub>7</sub> H <sub>11</sub> F <sub>3</sub> | C <sub>7</sub> H <sub>11</sub> OF <sub>3</sub> | C <sub>8</sub> H <sub>12</sub> F <sub>3</sub> NO | C <sub>11</sub> H <sub>18</sub> NO <sub>2</sub> F <sub>3</sub> | C <sub>11</sub> H <sub>19</sub> NO <sub>2</sub> F <sub>2</sub> |
| fw                                                        | 138.13                                       | 152.16                                        | 168.16                                         | 195.18                                           | 253.26                                                         | 235.27                                                         |
| temperature [K]                                           | 173                                          | 173                                           | 173                                            | 125                                              | 173                                                            | 173                                                            |
| crystal description                                       | Colourless needle                            | Colourless needle                             | Colourless plate                               | Colourless needle                                | Colourless plate                                               | Colourless plate                                               |
| crystal size [mm <sup>3</sup> ]                           | 0.66×0.02×0.01                               | 0.42×0.04×0.03                                | 0.45×0.18×0.03                                 | 0.20×0.02×0.01                                   | 0.14×0.04×0.01                                                 | 0.48×0.30×0.02                                                 |
| space group                                               | <i>P</i> 1̄                                  | <i>Cc</i>                                     | <i>P</i> 2 <sub>1</sub> / <i>c</i>             | <i>P</i> 2 <sub>1</sub>                          | <i>P</i> 1̄                                                    | <i>P</i> 2 <sub>1</sub> / <i>c</i>                             |
| <i>a</i> [Å]                                              | 4.7654(3)                                    | 4.8224(10)                                    | 12.7188(9)                                     | 9.161(2)                                         | 6.2763(4)                                                      | 21.5717(6)                                                     |
| <i>b</i> [Å]                                              | 6.2994(4)                                    | 12.4436(19)                                   | 7.5388(5)                                      | 4.8349(8)                                        | 9.5541(4)                                                      | 6.40500(10)                                                    |
| <i>c</i> [Å]                                              | 10.5867(6)                                   | 12.240(2)                                     | 8.2612(6)                                      | 9.983(3)                                         | 21.1552(10)                                                    | 18.7016(4)                                                     |
| $\alpha$ [°]                                              | 89.429(5)                                    |                                               |                                                |                                                  | 95.696(4)                                                      |                                                                |
| $\beta$ [°]                                               | 89.677(5)                                    | 90.55(2)                                      | 103.350(8)                                     | 105.30(3)                                        | 96.546(5)                                                      | 106.865(3)                                                     |
| $\gamma$ [°]                                              | 73.640(6)                                    |                                               |                                                |                                                  | 98.362(5)                                                      |                                                                |
| vol [Å <sup>3</sup> ]                                     | 304.92(3)                                    | 734.4(2)                                      | 770.72(10)                                     | 426.50(18)                                       | 1238.20(11)                                                    | 2472.81(10)                                                    |
| <i>Z</i>                                                  | 2                                            | 4                                             | 4                                              | 2                                                | 4                                                              | 8                                                              |
| $\rho$ (calc) [g/cm <sup>3</sup> ]                        | 1.504                                        | 1.376                                         | 1.449                                          | 1.520                                            | 1.359                                                          | 1.264                                                          |
| $\mu$ [mm <sup>-1</sup> ]                                 | 1.338                                        | 0.132                                         | 0.142                                          | 1.267                                            | 1.058                                                          | 0.105                                                          |
| F(000)                                                    | 144.0                                        | 320.0                                         | 352.0                                          | 204.0                                            | 536.0                                                          | 1008.0                                                         |
| reflections collected                                     | 3136                                         | 4594                                          | 16213                                          | 4826                                             | 25453                                                          | 79325                                                          |
| independent reflections ( <i>R</i> <sub>int</sub> )       | 1079 (0.0314)                                | 1567 (0.0948)                                 | 3673 (0.0485)                                  | 1619 (0.1421)                                    | 8795 (0.0659)                                                  | 5643 (0.0845)                                                  |
| parameters, restraints                                    | 82, 0                                        | 93, 2                                         | 101, 0                                         | 119, 2                                           | 322, 2                                                         | 295, 0                                                         |
| GoF on <i>F</i> <sup>2</sup>                              | 1.092                                        | 1.111                                         | 1.058                                          | 1.442                                            | 0.852                                                          | 1.192                                                          |
| <i>R</i> <sub><i>I</i></sub> [ <i>I</i> > 2σ( <i>I</i> )] | 0.0440                                       | 0.1075                                        | 0.0518                                         | 0.1848                                           | 0.0533                                                         | 0.0911                                                         |
| <i>wR</i> <sub>2</sub> (all data)                         | 0.1231                                       | 0.2933                                        | 0.1421                                         | 0.4428                                           | 0.1362                                                         | 0.2053                                                         |
| largest diff. peak/hole [e/Å <sup>3</sup> ]               | 0.33, -0.21                                  | 0.74, -0.47                                   | 0.44, -0.21                                    | 1.36, -0.61                                      | 0.30, -0.26                                                    | 0.50, -0.28                                                    |

## Details of Computational Calculations

### - Geometry Optimization and Energy Calculations of Monomers

The B3LYP-D3/def2-TZVP theoretical level accurately reproduces the geometries and molecular assemblies of *Janus Face* compounds as demonstrated by the low RMSD calculated between theoretical and x-ray diffraction geometries (Fig S1). Therefore, geometric optimization and harmonic frequency calculations for compounds **1-7** and **9-12** were carried out at the B3LYP-D3/def2-TZVP theoretical level in order to identify each conformer as true energy minima, showing no imaginary frequencies using Gaussian 16 Rev C.01 program.<sup>1</sup> Single point energies were calculated over the monomeric optimized geometries using the Perdew-Burke-Ernzerhof hybrid functional (PBE0)<sup>2</sup> corrected with D3 empirical dispersion<sup>3</sup> and def2-TZVP basis set, since it was demonstrated in a previous publication that this theoretical level is a powerful method to compute highly accurate electronic energies of similar *Janus Face* compounds.<sup>4</sup> Thus, Gibbs free energy values shown throughout the text for compounds **1-7** and **9-12** are expressed in terms of the sum of PBE0-D3/def2-TZVP electronic energies and B3LYP-D3/def2-TZVP thermal correction to Gibbs free energy at standard pressure and temperature. Molecular dipole moments were also obtained at the PBE0-D3/def2-TZVP level.

NBO analysis was carried out at NBO 7.0 program as implemented in Gaussian 16 for compounds **9-12** over the B3LYP-D3/def2-TZVP optimized geometries using the PBE0-D3/def2-TZVP theoretical level using the LEWIS, NCE, STERIC and DIPOLE keywords.

### - Geometry Optimization and Complexation Energies of Trimers

The trimeric arrangements of compounds **5** and **6** were optimized at the B3LYP-D3/def2-TZVP theoretical level and harmonic frequency calculation was carried out at the same level in order to identify each structure as true energy minima, showing no imaginary frequencies using Gaussian 16 Rev C.01 program. The starting structures for the optimization of **5<sub>ax</sub>** and **6<sub>ax</sub>** trimers were extracted from the x-ray diffraction data and **5<sub>eq</sub>** trimer was manually constructed using **5<sub>ax</sub>** experimental structure as a model scaffold. It was noted that stacking **6<sub>eq</sub>** one molecule on top of another did not result in a local minimum, and direct geometry optimization always led to a less organized trimeric arrangement. Therefore, Grimme's iterative-static metadynamics (iMTD-sMTD) protocol implemented in CREST software<sup>5</sup> and GFN2-xTB method<sup>6</sup> was used to explore the conformational space of the **6<sub>eq</sub>** trimer, and the global minimum was re-optimized in DFT and used for further calculations. The same procedure was carried out for **7<sub>ax</sub>**, **9<sub>ax</sub>**, **10<sub>ax</sub>** and **12<sub>ax</sub>** trimers, and in each case the global minimum was in good agreement with the experimental structures, evincing the reliability of the methodology (Fig. S2).

A trimeric arrangement of **5<sub>ax</sub>** was also optimized using the molecular crystal QM/MM method as implemented in Ash software<sup>7</sup> in order to evaluate the influence of long-range interactions to trimer geometry. A spherical molecular cluster with radius of 35 Å was built and optimized at the GFN2-xTB level. However, the central trimer geometry obtained through this approach was in worse agreement to experiment if compared to the trimeric arrangement optimized in vacuo with B3LYP-D3/def2-TZVP, and therefore the latter methodology was adopted.

The BSSE-corrected complexation energies for the trimeric arrangement of compounds **5** and **6** were computed using the London Dispersion-corrected Hartree Fock method (HFLD)<sup>7</sup> and the aug-cc-pVTZ basis set as implemented in ORCA 5.0.3<sup>8</sup> due to its high accuracy – between that of DLPNO-CCSD and DLPNO-CCSD(T) schemes – and fast basis set convergence.

### - NMR Calculations

The general methodology used in computing NMR properties for compound **5** were extracted from Giovanetti *et al*<sup>9</sup> and is briefly described here. Structures of **5<sub>ax</sub>** and **5<sub>eq</sub>** were optimized considering implicit solvation (cyclohexane, toluene, chloroform and acetone) using the integral equation formalism to the polarized continuum model (IEF-PCM) in Gaussian 16 Rev C.01 program in B3LYP-D3/def2-TZVP and M06-L-D3/pc-1 theoretical levels. In both cases harmonic frequency calculations were carried out over the optimized structures in order to confirm each conformer as true energy minimum, showing no imaginary frequencies. Single point energies were computed for the optimized structures at the PBE0-D3/def2-TZVP theoretical level, and Boltzmann populations of **5<sub>ax</sub>** and **5<sub>eq</sub>** were estimated at 298.15K considering their relative Gibbs free energies expressed in terms of the sum of PBE0-D3/def2-TZVP electronic energies and B3LYP-D3/def2-TZVP (or M06-L-D3/pc-1) thermal correction to Gibbs free energy at standard pressure and temperature. The <sup>1</sup>J<sub>CF</sub> coupling constant was then calculated at the M06-L/pcJ-1 also in Gaussian 16 Rev C.01.

Solvation effect was also explicitly considered using the Quantum Cluster Growth<sup>10</sup> (QCG) workflow for xTB software.<sup>11</sup> Molecular clusters for each conformer of **5** were constructed with the addition of either 10 cyclohexane molecules, 10 toluene molecules, 20 chloroform molecules or 15 acetone molecules, always maintaining the solute fixed. The entire molecular cluster was then optimized in xTB using the GFN2-xTB semi-empirical method with “extreme” optimization thresholds. The optimized clusters were re-optimized using the QM1/QM2 method implemented in ORCA 5.0.3, where the solute was treated with a DFT method (both B3LYP-D3/def2-TZVP and M06-L-D3/pc-1) while solvent molecules were maintained fixed and were treated with GFN2-xTB method. Harmonic frequency calculations were carried out over the optimized structures in order to confirm each conformer as true energy minimum, showing no imaginary frequencies. Single point energies were computed for the optimized structures at the PBE0-D3/def2-TZVP theoretical level, and Boltzmann populations of **5<sub>ax</sub>** and **5<sub>eq</sub>** were estimated at 298.15K considering their relative Gibbs free energies expressed in terms of the sum of PBE0-D3/def2-TZVP electronic energies and B3LYP-D3/def2-TZVP (or M06-L-D3/pc-1) thermal correction to Gibbs free energy at standard pressure and temperature. The <sup>1</sup>J<sub>CF</sub> coupling constant was also calculated in the QM1/QM2 scheme, in which the solute was included in QM1 level and was treated with the M06-L/pcJ-1 theoretical level, and solvent molecules were included in QM2 level and treated with the GFN2-xTB method in ORCA 5.0.3.

All NMR results are shown in Table S1.

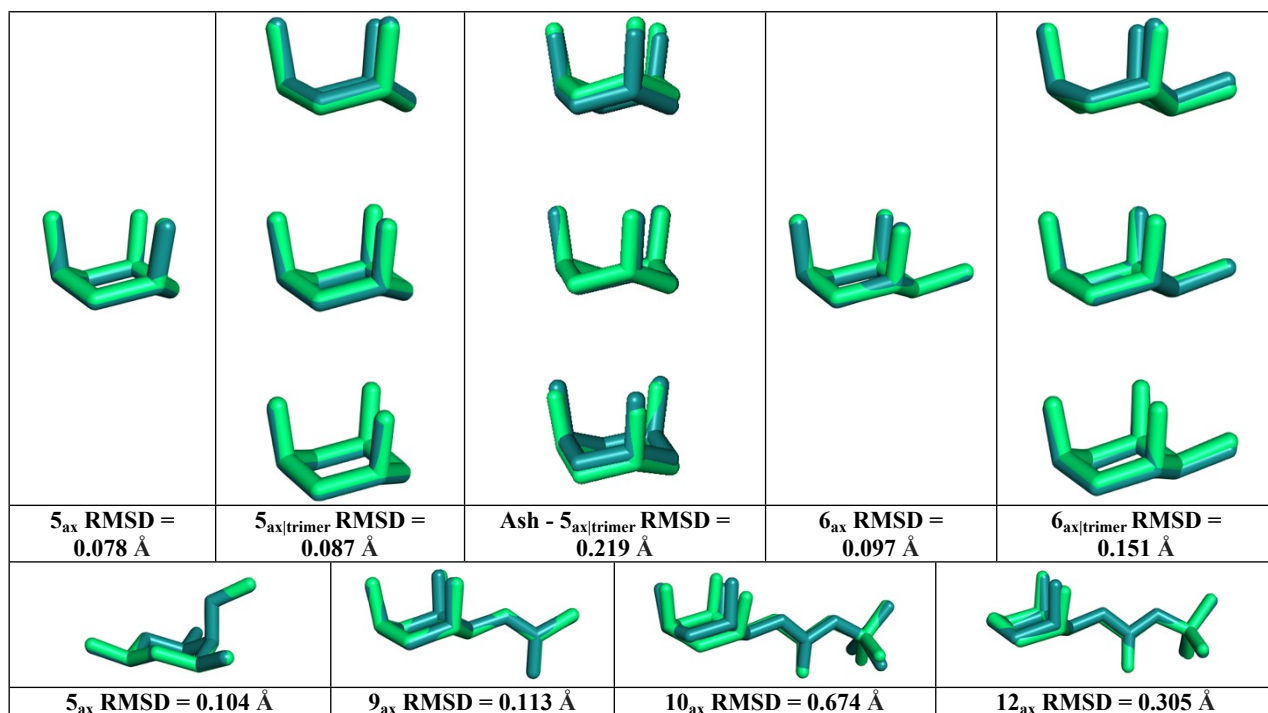

**Fig. S1** Superposition of X-ray diffraction (dark green) and calculated at B3LYP-D3/def2-TZVP theoretical level (light green) geometries with calculated RMSD over heavy atoms.

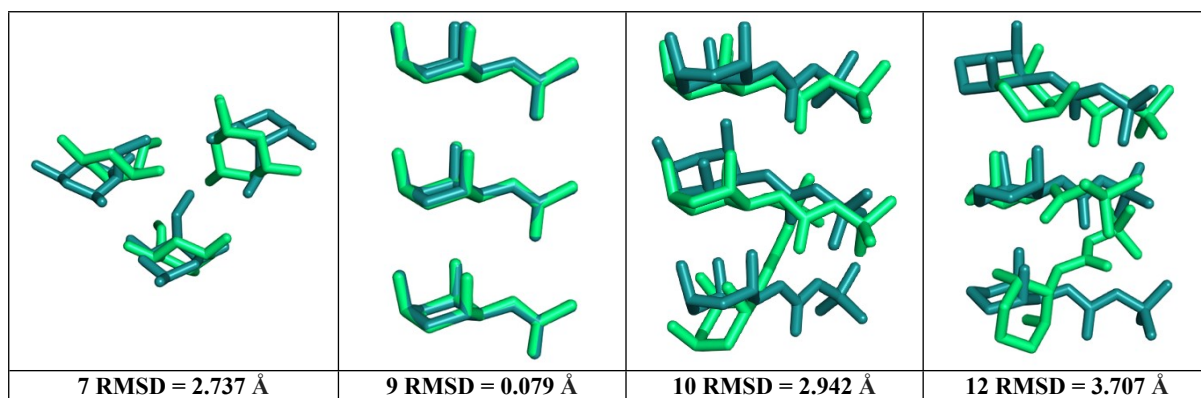

**Fig. S2** Superposition of X-ray diffraction (dark green) and calculated at GFN2-xTB//B3LYP-D3/def2-TZVP theoretical level (light green) trimer geometries with calculated RMSD over heavy atoms.

**Table S1** RMSD (Å) calculated over heavy atoms for the geometries obtained at B3LYP, B3LYP-D3, M06-2X, M06-2X-D3, M06L and M06L-D3 with the def2-TZVP basis set (B3LYP-D3/def2-TZVP geometry used as reference).

|                | <b>B3LYP</b> | <b>B3LYP-D3BJ</b> | <b>M06-2X</b> | <b>M06-2X-D3</b> | <b>M06L</b> | <b>M06L-D3</b> |
|----------------|--------------|-------------------|---------------|------------------|-------------|----------------|
| <b>1</b>       | 0.008        | 0.004             | 0.017         | 0.017            | 0.012       | 0.011          |
| <b>2ax</b>     | 0.013        | 0.007             | 0.100         | 0.098            | 0.016       | 0.052          |
| <b>2eq</b>     | 0.013        | 0.010             | 0.015         | 0.015            | 0.013       | 0.013          |
| <b>3ax</b>     | 0.008        | 0.004             | 0.014         | 0.014            | 0.013       | 0.013          |
| <b>3eq</b>     | 0.007        | 0.004             | 0.013         | 0.013            | 0.011       | 0.011          |
| <b>4ax</b>     | 0.007        | 0.003             | 0.011         | 0.011            | 0.016       | 0.016          |
| <b>4eq</b>     | 0.007        | 0.004             | 0.014         | 0.014            | 0.012       | 0.012          |
| <b>5ax</b>     | 0.013        | 0.005             | 0.017         | 0.017            | 0.019       | 0.020          |
| <b>5eq</b>     | 0.005        | 0.003             | 0.015         | 0.015            | 0.015       | 0.015          |
| <b>6ax</b>     | 0.006        | 0.008             | 0.015         | 0.015            | 0.018       | 0.018          |
| <b>6eq</b>     | 0.011        | 0.006             | 0.014         | 0.014            | 0.016       | 0.016          |
| <b>7ax</b>     | 0.029        | 0.008             | 0.099         | 0.099            | 0.094       | 0.095          |
| <b>7eq</b>     | 0.037        | 0.015             | 0.038         | 0.038            | 0.064       | 0.062          |
| <b>9ax</b>     | 0.137        | 0.137             | 0.127         | 0.127            | 0.061       | 0.061          |
| <b>9eq</b>     | 0.013        | 0.005             | 0.028         | 0.029            | 0.019       | 0.019          |
| <b>10ax</b>    | 0.364        | 0.067             | 0.063         | 0.069            | 0.040       | 0.047          |
| <b>10eq</b>    | 0.017        | 0.009             | 0.030         | 0.030            | 0.032       | 0.074          |
| <b>11ax</b>    | 0.013        | 0.012             | 0.304         | 0.305            | 0.014       | 0.224          |
| <b>11eq</b>    | 0.015        | 0.006             | 0.092         | 0.120            | 0.019       | 0.029          |
| <b>12ax</b>    | 0.287        | 0.041             | 0.058         | 0.064            | 0.025       | 0.030          |
| <b>12eq</b>    | 0.013        | 0.007             | 0.023         | 0.023            | 0.086       | 0.090          |
| <b>Average</b> | 0.049        | 0.017             | 0.053         | 0.055            | 0.029       | 0.044          |

**Table S2** NBO analysis relative energies (in kcal mol<sup>-1</sup>) obtained at the PBE0-D3/def2-TZVP theoretical level for compounds **9–12**, where  $\Delta E(T)$  is the electronic,  $\Delta E(L)$  the Lewis,  $\Delta E(NL)$  the non-Lewis,  $\Delta E(NCE)$  the electrostatic and  $\Delta E(NSA)$  the steric energies. Positive values represent a preference for the equatorial conformer whereas negative ones for the axial conformer.

|           | $\Delta E(T)$ | $\Delta E(L)$ | $\Delta E(NL)$ | $\Delta E(NCE)$ | $\Delta E(NSA)$ |
|-----------|---------------|---------------|----------------|-----------------|-----------------|
| <b>9</b>  | -2.21         | 4.81          | -7.03          | 0.32            | -0.98           |
| <b>10</b> | -1.34         | 4.86          | -6.20          | 5.37            | -2.19           |
| <b>11</b> | -4.31         | -3.50         | -0.82          | -7.56           | 0.35            |
| <b>12</b> | -3.45         | -3.56         | 0.11           | -2.65           | -1.28           |

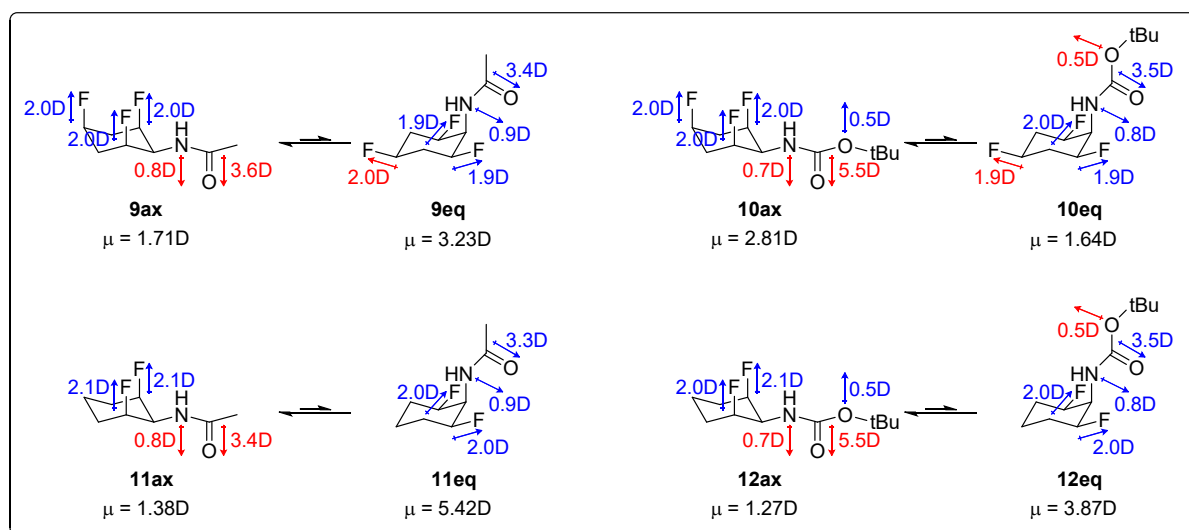

**Fig S3** Calculated contribution from the polar groups to molecular dipole moment in compounds **9–12** obtained from the NBO analysis. Dipole vectors/dipole values in blue and red represent dipoles in opposite directions.

NBO analysis suggest that electrostatic effects are the most important in stabilizing the axial C-F conformers, mostly due to  $F_{ax}-F_{ax}$  electrostatic repulsion minimization in **9<sub>ax</sub>** and **10<sub>ax</sub>** (each accounting for  $\sim 15.8$  kcal mol<sup>-1</sup> in destabilizing energy) and due to  $F_{ax}-H_{ax}$  stabilizing electrostatic interactions in **11<sub>ax</sub>** and **12<sub>ax</sub>** (each accounting for  $\sim 10.5$  kcal mol<sup>-1</sup> in stabilizing energy). For instance, the  $[\Delta E(NCE)]$  energy assumes positive values for both **9** and **10**, representing overall electrostatic stabilization of the equatorial conformers; and negative values in **11** and **12**, indicating overall axial stabilization. On the other hand, hyperconjugative energy  $[\Delta E(NL)]$  is in **9**, **10** and **11** axial-stabilizing and equally stabilizing axial and equatorial in **12**. This is mainly due to  $\sigma_{CH} \rightarrow \sigma_{CF}^*$  hyperconjugative interactions ( $\sim 5.2$  kcal mol<sup>-1</sup> each) that are present in axial conformers and are replaced by  $\sigma_{CH} \rightarrow \sigma_{CH}^*$  ( $\sim 2.6$  kcal mol<sup>-1</sup> each) in the equatorial counterparts. Finally, steric effects are in general of smaller importance than hyperconjugation and electrostatics since the bulky substituents (NHAc and NHBoc) are in all cases pointing on the opposite direction of the cyclohexane ring.

In addition, the decomposition of the molecular dipole moment into each NLMO contribution in compounds **9–12** show that besides electrostatic stabilization, the removal of a fluorine atom heavily increases equatorial conformers dipole moment (main dipole vectors are illustrated in Fig S3) which leads to overall molecular destabilization and favour the axial conformers. Note that the molecular dipole moment does not change much going from **9<sub>ax</sub>** to **11<sub>ax</sub>**, even though there are three parallel C-F<sub>ax</sub> bonds in the former and only two in



the latter. This can be rationalized by the amide orientation with respect to the C-F<sub>ax</sub> bonds: the H-C-N-C dihedral angle is 0° in the global minimum geometry of **9**<sub>ax</sub> and therefore its dipole is perfectly anti-parallel to the C-F<sub>ax</sub> bonds, being more effective in molecular dipole moment minimization. Conversely, in **11**<sub>ax</sub> the H-C-N-C dihedral angle is of 10°, and in this case the amide dipole is slightly tilted with respect to the C-F<sub>ax</sub> bonds, resulting in a less effective molecular dipole moment minimization. However, in both NHBoc-substituted cyclohexanes **10**<sub>ax</sub> and **12**<sub>ax</sub> the adopted H-C-N-C dihedral angle in the global minima geometries is of 0°. In those cases, the NHBoc dipole moment is contributing to molecular dipole moment minimization equally to **10**<sub>ax</sub> and **12**<sub>ax</sub>, and the removal of a C-F<sub>ax</sub> results in a molecular dipole moment roughly 1.5 D lower. The relaxed energy profile (PES) around H-C-N-C dihedral angles for compounds **9-12** are illustrated in Fig S4.

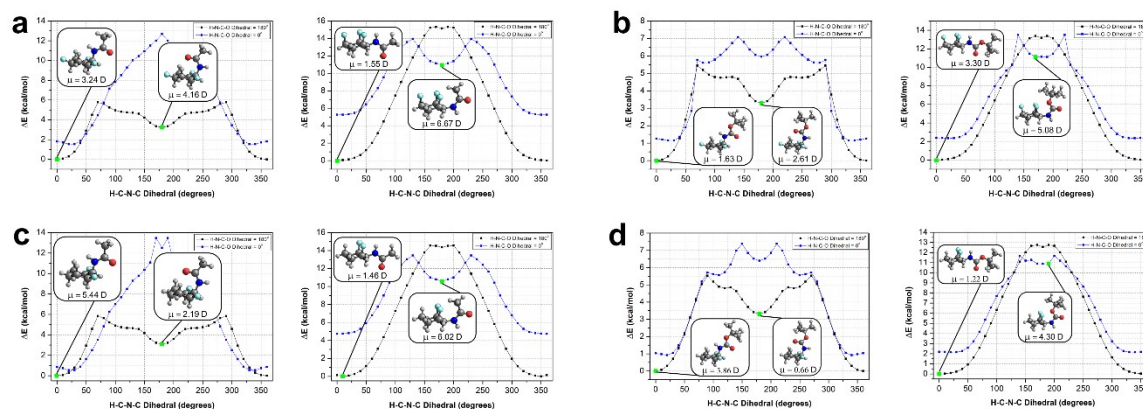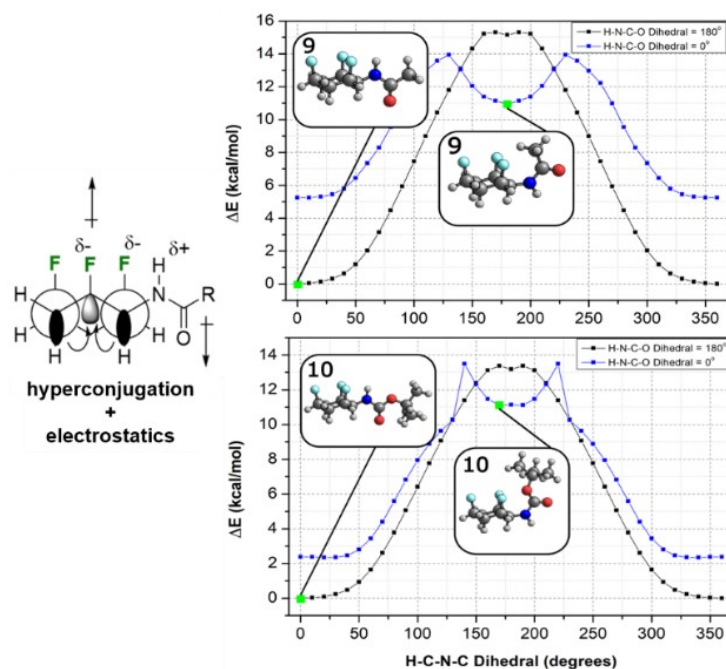

Rotational energy profiles for triaxial **9**<sub>ax</sub> and **10**<sub>ax</sub>. H-N-C-O dihedral angles of 180° are favoured with deep energy wells for conformers with N-H *syn* and C=O *anti* to the axial C-F bonds.<sup>20c</sup>

**Fig. S4** Relaxed energy profile (PES) of compounds **9** (a), **10** (b), **11** (c) and **12** (d) rotating around the C-NHac (or C-NHBoc) in steps of 10° for the triaxial and triequatorial conformers obtained at the B3LYP-D3/def2-TZVP theoretical level.

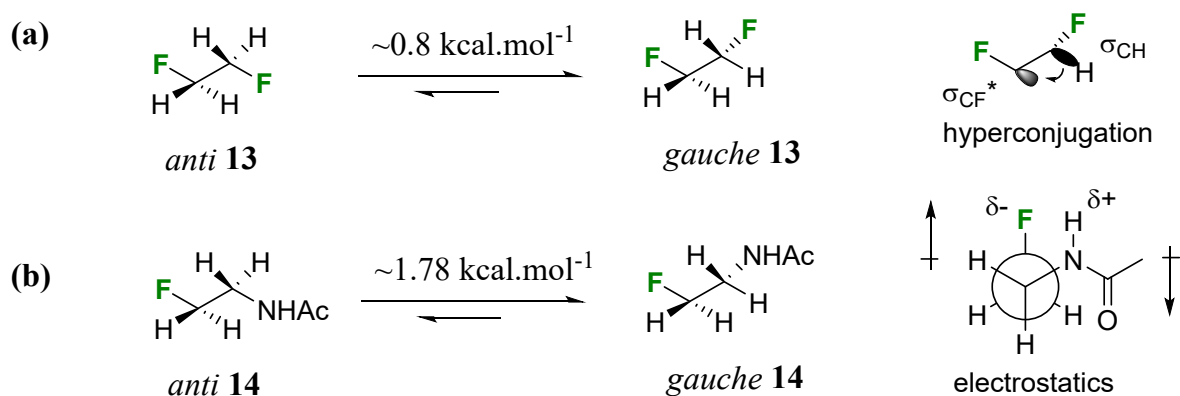

Fig. S5 (a) Fluorine *gauche* effect<sup>16</sup>; (b) Fluorine-amide *gauche*.<sup>16c</sup>

Table S3 Calculated  $\Delta G$ , conformer population and  $^1J_{CF}$  obtained from the implicit and explicit solvation models tested.

| Solvent     | Implicit Solvation                   |                                |            |                                      |                                |            | Experimental $^1J_{CF}$ |
|-------------|--------------------------------------|--------------------------------|------------|--------------------------------------|--------------------------------|------------|-------------------------|
|             | B3LYP-D3/def2-TZVP Geometry          |                                |            | M06-L-D3/pc-1 Geometry               |                                |            |                         |
|             | $\Delta G$ (kcal mol <sup>-1</sup> ) | Pop <sup>[a]</sup> (%) (ax/eq) | $^1J_{CF}$ | $\Delta G$ (kcal mol <sup>-1</sup> ) | Pop <sup>[a]</sup> (%) (ax/eq) | $^1J_{CF}$ |                         |
| Cyclohexane | 2.95                                 | 0.8/99.2                       | 161.2 Hz   | 3.03                                 | 0.6/99.4                       | 157.6 Hz   | 179.4 Hz                |
| Toluene     | 2.73                                 | 1.2/98.8                       | 160.3 Hz   | 2.82                                 | 0.9/99.1                       | 157.2 Hz   | 176.9 Hz                |
| Chloroform  | 2.01                                 | 5.0/95.0                       | 158.2 Hz   | 2.31                                 | 2.0/98.0                       | 156.1 Hz   | 176.0 Hz                |
| Acetone     | 1.15                                 | 12.7/87.3                      | 156.2 Hz   | 1.47                                 | 7.7/92.3                       | 154.8 Hz   | 173.5 Hz                |
| MAE         |                                      |                                | 17.5 Hz    |                                      |                                | 20.0 Hz    |                         |
| Solvent     | Explicit Solvation                   |                                |            |                                      |                                |            | Experimental $^1J_{CF}$ |
|             | B3LYP-D3/def2-TZVP Geometry          |                                |            | M06-L-D3/pc-1 Geometry               |                                |            |                         |
|             | $\Delta G$ (kcal mol <sup>-1</sup> ) | Pop (%) (ax/eq)                | $^1J_{CF}$ | $\Delta G$ (kcal mol <sup>-1</sup> ) | Pop (%) (ax/eq)                | $^1J_{CF}$ |                         |
| Cyclohexane | 3.12                                 | 0.5/99.5                       | 184.2 Hz   | 3.43                                 | 0.3/99.7                       | 178.9 Hz   | 179.4 Hz                |
| Toluene     | 1.22                                 | 11.4/88.6                      | 179.7 Hz   | 1.88                                 | 4.0/96.0                       | 177.4 Hz   | 176.9 Hz                |
| Chloroform  | 1.00                                 | 15.5/84.5                      | 174.0 Hz   | 0.95                                 | 16.8/83.2                      | 172.4 Hz   | 176.0 Hz                |
| Acetone     | 0.06                                 | 47.3/52.7                      | 173.2 Hz   | -0.03                                | 51.3/48.7                      | 170.8 Hz   | 173.5 Hz                |
| MAE         |                                      |                                | 2.5 Hz     |                                      |                                | 1.8 Hz     |                         |

<sup>[a]</sup> Boltzmann population obtained from calculated  $\Delta G$ ,  $k_B = 0.001987$  kcal/(mol K) and  $T = 298.15$  K.

**Table S4** Cartesian coordinates and Lowest harmonic vibrational frequencies of the optimized geometries for monomers, trimers and explicit solvation clusters studied calculated at the B3LYP-D3/def2-TZVP level in the gas-phase. Electronic energies were calculated over the optimized geometries at PBE0-D3/def2-TZVP theoretical level.

|                                                                                                                                            |             |                                                                                                                                           |             |             |             |             |             |
|--------------------------------------------------------------------------------------------------------------------------------------------|-------------|-------------------------------------------------------------------------------------------------------------------------------------------|-------------|-------------|-------------|-------------|-------------|
| <b>1</b><br><b>Energy (hartrees) = -830.802495</b><br><b>Lowest harmonic vibrational frequency (cm<sup>-1</sup>) = 108.53</b>              |             |                                                                                                                                           |             |             |             |             |             |
|                                                                                                                                            | F           | 0.00000000                                                                                                                                | 1.62019000  | 1.14377700  |             |             |             |
|                                                                                                                                            | F           | -2.38046500                                                                                                                               | 1.37436200  | -0.26293300 |             |             |             |
|                                                                                                                                            | F           | -1.40312600                                                                                                                               | -0.81009500 | 1.14377700  |             |             |             |
|                                                                                                                                            | F           | 0.00000000                                                                                                                                | -2.74872500 | -0.26293300 |             |             |             |
|                                                                                                                                            | F           | 1.40312600                                                                                                                                | -0.81009500 | 1.14377700  |             |             |             |
|                                                                                                                                            | F           | 2.38046500                                                                                                                                | 1.37436200  | -0.26293300 |             |             |             |
|                                                                                                                                            | C           | 0.00000000                                                                                                                                | 1.47625000  | -0.22511500 |             |             |             |
|                                                                                                                                            | C           | -1.24389400                                                                                                                               | 0.71816300  | -0.68864500 |             |             |             |
|                                                                                                                                            | C           | -1.27847000                                                                                                                               | -0.73812500 | -0.22511500 |             |             |             |
|                                                                                                                                            | C           | 0.00000000                                                                                                                                | -1.43632600 | -0.68864500 |             |             |             |
|                                                                                                                                            | C           | 1.27847000                                                                                                                                | -0.73812500 | -0.22511500 |             |             |             |
|                                                                                                                                            | C           | 1.24389400                                                                                                                                | 0.71816300  | -0.68864500 |             |             |             |
|                                                                                                                                            | H           | 0.00000000                                                                                                                                | 2.48000300  | -0.65917800 |             |             |             |
|                                                                                                                                            | H           | -1.25134200                                                                                                                               | 0.72246200  | -1.78586000 |             |             |             |
|                                                                                                                                            | H           | -2.14774600                                                                                                                               | -1.24000200 | -0.65917800 |             |             |             |
|                                                                                                                                            | H           | 0.00000000                                                                                                                                | -1.44492500 | -1.78586000 |             |             |             |
|                                                                                                                                            | H           | 2.14774600                                                                                                                                | -1.24000200 | -0.65917800 |             |             |             |
|                                                                                                                                            | H           | 1.25134200                                                                                                                                | 0.72246200  | -1.78586000 |             |             |             |
| <b>2<sub>ax</sub></b><br><b>Energy (hartrees) = -651.095750</b><br><b>Lowest harmonic vibrational frequency (cm<sup>-1</sup>) = 93.51</b>  |             | <b>2<sub>eq</sub></b><br><b>Energy (hartrees) = -651.085226</b><br><b>Lowest harmonic vibrational frequency (cm<sup>-1</sup>) = 98.74</b> |             |             |             |             |             |
| C                                                                                                                                          | -1.41584700 | 0.42071700                                                                                                                                | -0.69603600 | C           | 0.24189200  | 1.40882400  | -0.73009000 |
| C                                                                                                                                          | -1.06689700 | -1.01075400                                                                                                                               | -0.28895800 | C           | -1.16064600 | 0.96478500  | -0.29026500 |
| C                                                                                                                                          | 0.34362600  | -1.43639900                                                                                                                               | -0.69599200 | C           | -1.34081400 | -0.49494500 | -0.73056800 |
| C                                                                                                                                          | 1.40883600  | -0.41833500                                                                                                                               | -0.28917700 | C           | -0.25526800 | -1.48742600 | -0.29020500 |
| C                                                                                                                                          | 1.07199600  | 1.01609100                                                                                                                                | -0.69598200 | C           | 1.09928000  | -0.91384700 | -0.73030100 |
| C                                                                                                                                          | -0.34207400 | 1.42938100                                                                                                                                | -0.28844700 | C           | 1.41592900  | 0.52259800  | -0.29032300 |
| H                                                                                                                                          | -1.79029100 | -1.69622500                                                                                                                               | -0.74507300 | H           | -1.86066000 | 1.54718100  | -0.89802800 |
| H                                                                                                                                          | -1.42016800 | 0.42227100                                                                                                                                | -1.79347000 | H           | 0.24870900  | 1.44906900  | -1.82550300 |
| H                                                                                                                                          | 2.36400200  | -0.70203000                                                                                                                               | -0.74566500 | H           | -0.40945600 | -2.38521000 | -0.89751800 |
| H                                                                                                                                          | 1.07533900  | 1.01965700                                                                                                                                | -1.79342000 | H           | 1.13077300  | -0.93998200 | -1.82572300 |
| H                                                                                                                                          | -0.57409600 | 2.39884700                                                                                                                                | -0.74396800 | H           | 2.27027900  | 0.83789500  | -0.89799800 |
| H                                                                                                                                          | 0.34469100  | -1.44139000                                                                                                                               | -1.79342600 | H           | -1.37876400 | -0.50906100 | -1.82599800 |
| F                                                                                                                                          | -0.39232200 | 1.63802300                                                                                                                                | 1.09542000  | C           | 1.85391800  | 0.68404200  | 1.16682300  |
| F                                                                                                                                          | -1.22343500 | -1.15907700                                                                                                                               | 1.09474100  | H           | 2.72952900  | 0.06296600  | 1.35143600  |
| F                                                                                                                                          | 1.61604000  | -0.47994800                                                                                                                               | 1.09445200  | H           | 2.12069100  | 1.72405200  | 1.35053300  |
| C                                                                                                                                          | 0.67999600  | -2.84083700                                                                                                                               | -0.19760800 | H           | 1.09166300  | 0.40531100  | 1.88611500  |
| H                                                                                                                                          | -0.05533500 | -3.56496600                                                                                                                               | -0.55360100 | C           | -1.52029800 | 1.26279300  | 1.16692500  |
| H                                                                                                                                          | 1.66393400  | -3.15283600                                                                                                                               | -0.55305800 | H           | -1.42163200 | 2.33173100  | 1.35179300  |
| H                                                                                                                                          | 0.68512300  | -2.86345300                                                                                                                               | 0.89027600  | H           | -2.55423300 | 0.97283800  | 1.34979000  |
| C                                                                                                                                          | -2.80053500 | 0.83173100                                                                                                                                | -0.19833800 | H           | -0.89796200 | 0.74270400  | 1.88702900  |
| H                                                                                                                                          | -3.05960100 | 1.83069400                                                                                                                                | -0.55437200 | C           | -0.33443700 | -1.94680200 | 1.16721900  |
| H                                                                                                                                          | -3.56260400 | 0.13578800                                                                                                                                | -0.55434800 | H           | -1.30980900 | -2.39523600 | 1.35185500  |
| H                                                                                                                                          | -2.82335500 | 0.83853000                                                                                                                                | 0.88954400  | H           | 0.43320800  | -2.69739700 | 1.35128300  |
| C                                                                                                                                          | 2.12053400  | 2.00951100                                                                                                                                | -0.19818300 | H           | -0.19537600 | -1.14707700 | 1.88650900  |
| H                                                                                                                                          | 3.11512800  | 1.73430200                                                                                                                                | -0.55433300 | F           | -2.59247500 | -0.95713200 | -0.30529400 |
| H                                                                                                                                          | 1.89904200  | 3.01757700                                                                                                                                | -0.55395900 | F           | 0.46782200  | 2.72376700  | -0.30464600 |
| H                                                                                                                                          | 2.13784400  | 2.02561400                                                                                                                                | 0.88968000  | F           | 2.12528600  | -1.76662600 | -0.30460000 |
| <b>3<sub>ax</sub></b><br><b>Energy (hartrees) = -731.620767</b><br><b>Lowest harmonic vibrational frequency (cm<sup>-1</sup>) = 106.79</b> |             | <b>3<sub>eq</sub></b><br><b>Energy (hartrees) = -731.624973</b><br><b>Lowest harmonic vibrational frequency (cm<sup>-1</sup>) = 99.82</b> |             |             |             |             |             |
| C                                                                                                                                          | -1.28210600 | 0.95394200                                                                                                                                | -0.36219900 | C           | 1.24038400  | -0.93230600 | -0.48276700 |
| C                                                                                                                                          | 0.00000100  | 1.63913200                                                                                                                                | -0.83292800 | C           | 1.27511400  | 0.56813900  | -0.20423000 |
| C                                                                                                                                          | 1.28210900  | 0.95393400                                                                                                                                | -0.36221100 | C           | 0.00005100  | 1.20775600  | -0.74828300 |
| C                                                                                                                                          | 1.23898400  | -0.54037800                                                                                                                               | -0.66082700 | C           | -1.27505000 | 0.56825900  | -0.20420100 |
| C                                                                                                                                          | -0.00000500 | -1.23908300                                                                                                                               | -0.10977900 | C           | -1.24050600 | -0.93219000 | -0.48277600 |
| C                                                                                                                                          | -1.23898900 | -0.54036800                                                                                                                               | -0.66082600 | C           | -0.00007900 | -1.58399800 | 0.11167600  |
| H                                                                                                                                          | 2.15130000  | 1.38657800                                                                                                                                | -0.86599200 | H           | 2.15132900  | 1.02679800  | -0.66909000 |
| H                                                                                                                                          | -0.00000400 | 1.67738200                                                                                                                                | -1.92631100 | H           | -2.15123700 | 1.02702800  | -0.66899400 |
| H                                                                                                                                          | 0.00000800  | 2.66780800                                                                                                                                | -0.47238800 | H           | -1.27506200 | -1.08422700 | -1.56840600 |
| H                                                                                                                                          | -2.15130200 | 1.38658900                                                                                                                                | -0.86597000 | H           | -0.00009500 | -1.44483000 | 1.19291200  |
| H                                                                                                                                          | 1.23154500  | -0.65630800                                                                                                                               | -1.75209300 | H           | -0.00014100 | -2.65157000 | -0.10555600 |
| H                                                                                                                                          | -0.00001300 | -2.28818800                                                                                                                               | -0.41930700 | H           | 0.00003700  | 1.08389000  | -1.83841300 |
| H                                                                                                                                          | -1.23154200 | -0.65628600                                                                                                                               | -1.75209300 | F           | 2.38335100  | -1.51806900 | 0.04294200  |
| F                                                                                                                                          | -1.45994800 | 1.16592500                                                                                                                                | 0.99577600  | H           | 1.27494700  | -1.08433500 | -1.56837600 |
| F                                                                                                                                          | -0.00000400 | -1.21929500                                                                                                                               | 1.26864200  | F           | 0.00011400  | 2.56460400  | -0.48392700 |
| F                                                                                                                                          | -2.38036900 | -1.16075100                                                                                                                               | -0.18638400 | F           | 1.37533300  | 0.77746100  | 1.15952400  |
| F                                                                                                                                          | 1.45996700  | 1.16592400                                                                                                                                | 0.99576000  | F           | -1.37520100 | 0.77751700  | 1.15957300  |
| F                                                                                                                                          | 2.38036000  | -1.16076400                                                                                                                               | -0.18637500 | F           | -2.38351300 | -1.51781500 | 0.04293400  |
| <b>4<sub>ax</sub></b><br><b>Energy (hartrees) = -632.436694</b>                                                                            |             | <b>4<sub>eq</sub></b><br><b>Energy (hartrees) = -632.443432</b>                                                                           |             |             |             |             |             |

|                                                                                    |             |             |             |                                                                                    |             |             |             |
|------------------------------------------------------------------------------------|-------------|-------------|-------------|------------------------------------------------------------------------------------|-------------|-------------|-------------|
| <b>Lowest harmonic vibrational frequency (cm<sup>-1</sup>) = 104.38</b>            |             |             |             | <b>Lowest harmonic vibrational frequency (cm<sup>-1</sup>) = 110.41</b>            |             |             |             |
| C                                                                                  | -0.94591500 | -1.27525500 | -0.76311800 | C                                                                                  | -0.86824000 | 1.26574600  | 0.06994600  |
| C                                                                                  | 0.48833600  | -1.27599000 | -0.24237700 | C                                                                                  | 0.52251100  | 1.24002200  | -0.54584900 |
| C                                                                                  | 1.20595800  | 0.00000100  | -0.65594800 | C                                                                                  | 1.29480700  | 0.00000600  | -0.11642500 |
| C                                                                                  | 0.48833700  | 1.27598900  | -0.24237300 | C                                                                                  | 0.52252500  | -1.24001900 | -0.54584600 |
| C                                                                                  | -0.94591800 | 1.27526500  | -0.76310900 | C                                                                                  | -0.86822600 | -1.26575700 | 0.06994900  |
| C                                                                                  | -1.72174100 | 0.00000200  | -0.44680300 | C                                                                                  | -1.62952600 | -0.00000900 | -0.30515300 |
| H                                                                                  | -0.92200400 | -1.40448400 | -1.84960800 | H                                                                                  | 2.30428900  | 0.00001000  | -0.53232500 |
| H                                                                                  | -1.47539000 | -2.13198100 | -0.34506100 | H                                                                                  | 0.46652100  | 1.25136700  | -1.64059300 |
| H                                                                                  | -1.47538400 | 2.13198300  | -0.34502800 | H                                                                                  | -0.77229000 | 1.31659500  | 1.15549800  |
| H                                                                                  | -0.92201500 | 1.40451100  | -1.84959700 | H                                                                                  | -1.40930300 | 2.14855700  | -0.27019700 |
| F                                                                                  | 0.49126700  | 1.40423400  | 1.13965500  | H                                                                                  | 0.46653100  | -1.25136200 | -1.64059000 |
| F                                                                                  | -2.07648500 | -0.00000300 | 0.90398600  | H                                                                                  | -1.40927600 | -2.14857500 | -0.27019600 |
| F                                                                                  | 0.49126700  | -1.40424600 | 1.13965100  | H                                                                                  | -0.77227900 | -1.31660400 | 1.15550100  |
| F                                                                                  | 2.50467100  | 0.00000500  | -0.17133400 | H                                                                                  | -1.86041400 | -0.00001200 | -1.37674700 |
| H                                                                                  | 1.26497900  | -0.00000100 | -1.75200800 | F                                                                                  | 1.41861200  | 0.00001000  | 1.27031800  |
| H                                                                                  | 1.04007300  | 2.13384100  | -0.63805900 | F                                                                                  | 1.22784300  | -2.37714700 | -0.16693400 |
| H                                                                                  | 1.04006700  | -2.13384300 | -0.63806700 | F                                                                                  | -2.85836900 | -0.00001200 | 0.35909600  |
| H                                                                                  | -2.66114800 | -0.00000100 | -1.00783200 | F                                                                                  | 1.22781600  | 2.37715900  | -0.16693300 |
| <b><math>\bar{S}_{ax}</math></b><br><b>Energy (hartrees) = -533.250777</b>         |             |             |             | <b><math>\bar{S}_{eq}</math></b><br><b>Energy (hartrees) = -533.256662</b>         |             |             |             |
| <b>Lowest harmonic vibrational frequency (cm<sup>-1</sup>) = 107.60</b>            |             |             |             | <b>Lowest harmonic vibrational frequency (cm<sup>-1</sup>) = 145.69</b>            |             |             |             |
| F                                                                                  | -1.63365300 | -0.47495500 | 1.03911200  | C                                                                                  | 0.02867200  | -1.44130000 | 0.33149600  |
| F                                                                                  | 0.40540000  | 1.65159400  | 1.03937100  | C                                                                                  | -1.24694300 | -0.75338100 | -0.13145600 |
| F                                                                                  | 1.22837000  | -1.17689300 | 1.03910300  | H                                                                                  | -2.12160200 | -1.28180200 | 0.24871200  |
| C                                                                                  | -1.41889900 | -0.41263400 | -0.34152200 | H                                                                                  | -1.28513900 | -0.77639200 | -1.22333900 |
| H                                                                                  | -2.36972400 | -0.68921700 | -0.80755300 | C                                                                                  | -1.26255700 | 0.69585500  | 0.33149700  |
| C                                                                                  | -1.05916600 | 1.01515100  | -0.73188200 | C                                                                                  | -0.02895100 | 1.45652900  | -0.13152700 |
| H                                                                                  | -1.77778700 | 1.70386500  | -0.28565800 | H                                                                                  | -0.02981100 | 1.50100600  | -1.22341300 |
| H                                                                                  | -1.15192900 | 1.10410700  | -1.81925800 | H                                                                                  | -0.04923100 | 2.47822900  | 0.24859500  |
| C                                                                                  | 0.35207100  | 1.43511100  | -0.34138900 | C                                                                                  | 1.23388600  | 0.74547900  | 0.33148400  |
| H                                                                                  | 0.58804500  | 2.39701200  | -0.80701600 | C                                                                                  | 1.27598900  | -0.70324900 | -0.13146900 |
| C                                                                                  | 1.40859700  | 0.40980500  | -0.73210000 | H                                                                                  | 2.17094400  | -1.19644300 | 0.24878400  |
| H                                                                                  | 1.53173900  | 0.44574700  | -1.81949400 | H                                                                                  | 1.31512500  | -0.72489600 | -1.22335700 |
| H                                                                                  | 2.36442800  | 0.68783200  | -0.28604600 | F                                                                                  | -2.40233600 | 1.32399800  | -0.18308900 |
| C                                                                                  | 1.06683500  | -1.02233800 | -0.34155000 | F                                                                                  | 2.34775400  | 1.41849100  | -0.18307700 |
| H                                                                                  | 1.78173500  | -1.70756500 | -0.80751100 | F                                                                                  | 0.05449200  | -2.74241700 | -0.18310800 |
| C                                                                                  | -0.34955700 | -1.42480800 | -0.73176200 | H                                                                                  | 0.03070800  | -1.54419600 | 1.42244400  |
| H                                                                                  | -0.58669300 | -2.39143700 | -0.28538400 | H                                                                                  | -1.35271600 | 0.74560200  | 1.42245100  |
| H                                                                                  | -0.38016000 | -1.54978200 | -1.81912400 | H                                                                                  | 1.32195600  | 0.79864900  | 1.42244300  |
| <b><math>\bar{S}_{ax trimer}</math></b><br><b>Energy (hartrees) = -1601.508916</b> |             |             |             | <b><math>\bar{S}_{eq trimer}</math></b><br><b>Energy (hartrees) = -1601.504129</b> |             |             |             |
| <b>Lowest harmonic vibrational frequency (cm<sup>-1</sup>) = 18.05</b>             |             |             |             | <b>Lowest harmonic vibrational frequency (cm<sup>-1</sup>) = 1.63</b>              |             |             |             |
| F                                                                                  | -3.67500100 | -1.67028100 | -0.25583600 | C                                                                                  | -4.24954500 | -1.07497900 | -0.95885300 |
| F                                                                                  | -3.68478200 | 0.61267700  | 1.57481100  | C                                                                                  | -4.71006500 | -1.37587800 | 0.45955000  |
| F                                                                                  | -3.67879400 | 1.05813400  | -1.31703700 | C                                                                                  | -4.69335500 | 0.30322100  | -1.42614100 |
| C                                                                                  | -5.06540600 | -1.46153600 | -0.22733900 | F                                                                                  | -4.77682700 | -2.03872500 | -1.82186900 |
| H                                                                                  | -5.51539300 | -2.44579400 | -0.37974600 | H                                                                                  | -3.15971600 | -1.16783400 | -1.03078600 |
| C                                                                                  | -5.45922600 | -0.92211500 | 1.14034800  | H                                                                                  | -4.33841900 | -2.34980700 | 0.77971300  |
| H                                                                                  | -5.01691800 | -1.54481000 | 1.91893500  | H                                                                                  | -5.80214300 | -1.40823600 | 0.47688600  |
| H                                                                                  | -6.54631300 | -1.00454200 | 1.23733700  | C                                                                                  | -4.23532400 | -0.28959500 | 1.41314100  |
| C                                                                                  | -5.07401300 | 0.53200600  | 1.37233600  | C                                                                                  | -4.22021800 | 1.37299800  | -0.45330100 |
| H                                                                                  | -5.52936200 | 0.89163200  | 2.29851200  | H                                                                                  | -4.31043300 | 0.50519500  | -2.42706100 |
| C                                                                                  | -5.46254300 | 1.44650300  | 0.21940600  | H                                                                                  | -5.78485500 | 0.32541600  | -1.47085800 |
| H                                                                                  | -6.54986000 | 1.57060500  | 0.23620000  | C                                                                                  | -4.67792900 | 1.09747900  | 0.97126400  |
| H                                                                                  | -5.02199100 | 2.43250700  | 0.37196500  | F                                                                                  | -4.74992300 | -0.54587800 | 2.68631900  |
| C                                                                                  | -5.06872800 | 0.92069800  | -1.15366500 | H                                                                                  | -3.14459400 | -0.32497100 | 1.51484100  |
| H                                                                                  | -5.52088300 | 1.54208200  | -1.93079700 | H                                                                                  | -4.72307500 | 2.61114100  | -0.86038500 |
| C                                                                                  | -5.45340100 | -0.53580200 | -1.37147600 | F                                                                                  | -3.12857200 | 1.46296800  | -0.49035400 |
| H                                                                                  | -5.00633900 | -0.89593300 | -2.29886700 | H                                                                                  | -5.76890600 | 1.14733700  | 1.00678900  |
| H                                                                                  | -6.53988100 | -0.58520400 | -1.49429800 | H                                                                                  | -4.28335000 | 1.85509300  | 1.64918100  |
| F                                                                                  | 1.04384700  | -1.68524600 | -0.25242600 | H                                                                                  | -1.27521800 | 0.29981500  | -1.53442900 |
| F                                                                                  | 1.04820600  | 0.62337500  | 1.59157700  | C                                                                                  | -0.18592500 | 0.27994600  | -1.41663500 |
| F                                                                                  | 1.04843600  | 1.07062100  | -1.32720400 | C                                                                                  | 0.27026500  | -1.10190200 | -0.97310700 |
| C                                                                                  | -0.34691000 | -1.45295000 | -0.21841500 | C                                                                                  | 0.26018100  | 1.37495800  | -0.45940300 |
| H                                                                                  | -0.81214200 | -2.43030000 | -0.36780400 | F                                                                                  | 0.34500900  | 0.54459100  | -2.68196500 |
| C                                                                                  | -0.73244600 | -0.90956100 | 1.14793600  | H                                                                                  | -0.11517300 | -1.86348500 | -1.65161000 |
| H                                                                                  | -0.28905100 | -1.53291400 | 1.92607100  | C                                                                                  | -0.18199700 | -1.38600700 | 0.45123900  |
| H                                                                                  | -1.81834500 | -0.97928700 | 1.23764900  | H                                                                                  | 1.36029900  | -1.14607700 | -1.01430700 |
| C                                                                                  | -0.34356500 | 0.54184600  | 1.37786000  | C                                                                                  | -0.18854000 | 1.06538500  | 0.96084400  |
| H                                                                                  | -0.80466100 | 0.90271800  | 2.30046000  | H                                                                                  | -0.13398600 | 2.34019700  | -0.77859500 |
| C                                                                                  | -0.72943000 | 1.45455700  | 0.22529100  | H                                                                                  | 1.34958700  | 1.44198900  | -0.48025800 |
| H                                                                                  | -1.81517200 | 1.56872800  | 0.24221600  | H                                                                                  | -1.27112500 | -1.50259200 | 0.48718400  |
| H                                                                                  | -0.28431100 | 2.43938500  | 0.37559500  | C                                                                                  | 0.26599300  | -0.30919000 | 1.42797300  |
| C                                                                                  | -0.34311000 | 0.92735400  | -1.14727400 | F                                                                                  | 0.35212700  | -2.61201400 | 0.85728700  |
| H                                                                                  | -0.80498700 | 1.54636400  | -1.92027400 | H                                                                                  | -1.27777400 | 1.15245400  | 1.04218700  |
| C                                                                                  | -0.73091000 | -0.52682000 | -1.36100200 | F                                                                                  | 0.34205400  | 2.03102500  | 1.82065100  |
| H                                                                                  | -0.28644300 | -0.88989500 | -2.28904400 | H                                                                                  | -0.12284700 | -0.51717600 | 2.42523500  |
| H                                                                                  | -1.81669900 | -0.56686300 | -1.46836500 | H                                                                                  | 1.35578200  | -0.31965100 | 1.49153900  |
| F                                                                                  | 5.75379400  | -1.70832300 | -0.26241700 | H                                                                                  | 3.20776300  | 0.30879400  | -1.48807800 |
| F                                                                                  | 5.76868700  | 0.62099000  | 1.59573100  | C                                                                                  | 4.29801200  | 0.30195400  | -1.42795000 |
| F                                                                                  | 5.76368700  | 1.06625100  | -1.34694600 | C                                                                                  | 4.75917700  | -1.07049900 | -0.96109900 |
| C                                                                                  | 4.37044300  | -1.46134500 | -0.22253500 | C                                                                                  | 4.74597500  | 1.37968000  | -0.45225800 |
| H                                                                                  | 3.88959600  | -2.43286500 | -0.36874600 | H                                                                                  | 4.68314300  | 0.51125300  | -2.42620300 |

|                                                                                                                                                                           |              |              |              |                                                                                                                                                                           |              |              |              |
|---------------------------------------------------------------------------------------------------------------------------------------------------------------------------|--------------|--------------|--------------|---------------------------------------------------------------------------------------------------------------------------------------------------------------------------|--------------|--------------|--------------|
| C                                                                                                                                                                         | 3.98967000   | -0.91356600  | 1.14422900   | C                                                                                                                                                                         | 4.30621300   | -1.38055700  | 0.45758200   |
| H                                                                                                                                                                         | 4.43589600   | -1.53681200  | 1.92117500   | F                                                                                                                                                                         | 4.22945600   | -2.03840400  | -1.82237700  |
| H                                                                                                                                                                         | 2.90366900   | -0.98044100  | 1.23677300   | H                                                                                                                                                                         | 5.84878300   | -1.15295800  | -1.03935700  |
| C                                                                                                                                                                         | 4.38310700   | 0.53756000   | 1.37382900   | C                                                                                                                                                                         | 4.29286000   | 1.09405700   | 0.97155300   |
| H                                                                                                                                                                         | 3.91136500   | 0.89874100   | 2.29227300   | F                                                                                                                                                                         | 4.20396300   | 2.60475800   | -0.85804400  |
| C                                                                                                                                                                         | 3.99608700   | 1.44852500   | 0.21923800   | H                                                                                                                                                                         | 5.83445800   | 1.49829600   | -0.48914100  |
| H                                                                                                                                                                         | 2.91031200   | 1.56363800   | 0.23831600   | H                                                                                                                                                                         | 4.69773200   | -2.34648000  | 0.77739300   |
| H                                                                                                                                                                         | 4.44506300   | 2.43218500   | 0.36742600   | H                                                                                                                                                                         | 3.21625100   | -1.44492800  | 0.47618900   |
| C                                                                                                                                                                         | 4.37878800   | 0.92054100   | -1.15482900  | C                                                                                                                                                                         | 4.75400700   | -0.28624400  | 1.41482100   |
| H                                                                                                                                                                         | 3.90434500   | 1.53731100   | -1.92361500  | H                                                                                                                                                                         | 3.20239900   | 1.13393300   | 1.01147400   |
| C                                                                                                                                                                         | 3.98492100   | -0.53348100  | -1.36416900  | H                                                                                                                                                                         | 4.67447300   | 1.85684700   | 1.65062700   |
| H                                                                                                                                                                         | 4.42735400   | -0.89871100  | -2.29261000  | F                                                                                                                                                                         | 4.21994000   | -0.55205100  | 2.68101100   |
| H                                                                                                                                                                         | 2.89847000   | -0.56980300  | -1.46763600  | H                                                                                                                                                                         | 5.84323100   | -0.30433900  | 1.53081700   |
| <b><math>\bar{S}_{ax}[\text{cyclohexane}]</math></b><br><b>Energy (hartrees) = -533.217560</b><br><b>Lowest harmonic vibrational frequency (cm<sup>-1</sup>) = 110.66</b> |              |              |              | <b><math>\bar{S}_{eq}[\text{cyclohexane}]</math></b><br><b>Energy (hartrees) = -533.222028</b><br><b>Lowest harmonic vibrational frequency (cm<sup>-1</sup>) = 149.88</b> |              |              |              |
| F                                                                                                                                                                         | 0.558304000  | -2.042079000 | 1.895776000  | C                                                                                                                                                                         | -0.823725000 | 1.445658000  | -0.127929000 |
| F                                                                                                                                                                         | -1.354021000 | 0.087045000  | 1.209649000  | C                                                                                                                                                                         | -1.328139000 | 0.046633000  | -0.448975000 |
| F                                                                                                                                                                         | 1.537836000  | 0.514507000  | 0.839208000  | H                                                                                                                                                                         | -1.858590000 | 0.044569000  | -1.402500000 |
| C                                                                                                                                                                         | 0.421924000  | -2.334641000 | 0.532700000  | H                                                                                                                                                                         | -2.027488000 | -0.262232000 | 0.332945000  |
| H                                                                                                                                                                         | 0.565742000  | -3.415616000 | 0.442216000  | C                                                                                                                                                                         | -0.168842000 | -0.937929000 | -0.488338000 |
| C                                                                                                                                                                         | -0.985055000 | -1.974691000 | 0.074785000  | C                                                                                                                                                                         | 0.644231000  | -0.921715000 | 0.798250000  |
| H                                                                                                                                                                         | -1.712069000 | -2.402358000 | 0.767223000  | H                                                                                                                                                                         | 0.011918000  | -1.268738000 | 1.620192000  |
| H                                                                                                                                                                         | -1.151889000 | -2.441655000 | -0.902302000 | H                                                                                                                                                                         | 1.494985000  | -1.599916000 | 0.714450000  |
| C                                                                                                                                                                         | -1.234349000 | -0.478876000 | -0.065504000 | C                                                                                                                                                                         | 1.120307000  | 0.490385000  | 1.106783000  |
| H                                                                                                                                                                         | -2.196312000 | -0.312102000 | -0.560797000 | C                                                                                                                                                                         | -0.031119000 | 1.483552000  | 1.170567000  |
| C                                                                                                                                                                         | -0.135865000 | 0.242877000  | -0.836301000 | H                                                                                                                                                                         | 0.345670000  | 2.490564000  | 1.356039000  |
| H                                                                                                                                                                         | -0.232764000 | -0.021794000 | -1.894572000 | H                                                                                                                                                                         | -0.692605000 | 1.208282000  | 1.996658000  |
| H                                                                                                                                                                         | -0.284143000 | 1.321435000  | -0.757631000 | F                                                                                                                                                                         | -0.680331000 | -2.227661000 | -0.681979000 |
| C                                                                                                                                                                         | 1.277544000  | -0.106282000 | -0.388214000 | F                                                                                                                                                                         | 1.782479000  | 0.483372000  | 2.341596000  |
| H                                                                                                                                                                         | 1.999320000  | 0.311829000  | -1.096841000 | F                                                                                                                                                                         | -1.924006000 | 2.304598000  | -0.016778000 |
| C                                                                                                                                                                         | 1.508257000  | -1.605856000 | -0.249051000 | H                                                                                                                                                                         | -0.217366000 | 1.833041000  | -0.954829000 |
| H                                                                                                                                                                         | 2.477099000  | -1.781150000 | 0.222202000  | H                                                                                                                                                                         | 0.476728000  | -0.731705000 | -1.349758000 |
| H                                                                                                                                                                         | 1.552182000  | -2.038230000 | -1.254919000 | H                                                                                                                                                                         | 1.859685000  | 0.813583000  | 0.364793000  |
| C                                                                                                                                                                         | -0.403611000 | -2.208336000 | -4.251447000 | C                                                                                                                                                                         | -0.483464000 | -0.315996000 | 5.849648000  |
| C                                                                                                                                                                         | -0.676857000 | -3.639911000 | -4.704389000 | C                                                                                                                                                                         | -0.159783000 | 1.143498000  | 5.541133000  |
| C                                                                                                                                                                         | -1.965083000 | -4.162612000 | -4.073702000 | C                                                                                                                                                                         | 0.717858000  | 1.736783000  | 6.639667000  |
| C                                                                                                                                                                         | -3.140976000 | -3.254754000 | -4.425846000 | C                                                                                                                                                                         | 2.004732000  | 0.928525000  | 6.781959000  |
| C                                                                                                                                                                         | -2.867834000 | -1.822515000 | -3.973488000 | C                                                                                                                                                                         | 1.687004000  | -0.533276000 | 7.085799000  |
| C                                                                                                                                                                         | -1.579601000 | -1.301460000 | -4.605016000 | C                                                                                                                                                                         | 0.804080000  | -1.123443000 | 5.989723000  |
| H                                                                                                                                                                         | -2.162889000 | -5.178342000 | -4.422420000 | H                                                                                                                                                                         | 0.955006000  | 2.776945000  | 6.403967000  |
| H                                                                                                                                                                         | -0.772866000 | -3.661479000 | -5.792234000 | H                                                                                                                                                                         | 0.375807000  | 1.200471000  | 4.591033000  |
| H                                                                                                                                                                         | 0.161018000  | -4.285314000 | -4.431149000 | H                                                                                                                                                                         | -1.081768000 | 1.723086000  | 5.448798000  |
| H                                                                                                                                                                         | -0.250819000 | -2.198814000 | -3.168769000 | H                                                                                                                                                                         | -1.052914000 | -0.373418000 | 6.780832000  |
| H                                                                                                                                                                         | 0.507332000  | -1.834569000 | -4.723463000 | H                                                                                                                                                                         | -1.101526000 | -0.741683000 | 5.055541000  |
| H                                                                                                                                                                         | -3.295803000 | -3.267793000 | -5.507200000 | H                                                                                                                                                                         | 2.568558000  | 0.986743000  | 5.848447000  |
| H                                                                                                                                                                         | -4.052012000 | -3.628467000 | -3.953774000 | H                                                                                                                                                                         | 2.624764000  | 1.349126000  | 7.577122000  |
| H                                                                                                                                                                         | -3.704295000 | -1.177922000 | -4.251207000 | H                                                                                                                                                                         | 2.613536000  | -1.106438000 | 7.166790000  |
| H                                                                                                                                                                         | -2.774380000 | -1.799130000 | -2.884801000 | H                                                                                                                                                                         | 1.167526000  | -0.600141000 | 8.045223000  |
| H                                                                                                                                                                         | -1.696952000 | -1.272994000 | -5.690528000 | H                                                                                                                                                                         | 1.345193000  | -1.100065000 | 5.041385000  |
| H                                                                                                                                                                         | -1.382234000 | -0.281254000 | -4.267198000 | H                                                                                                                                                                         | 0.569312000  | -2.165615000 | 6.219321000  |
| H                                                                                                                                                                         | -1.850155000 | -4.201020000 | -2.987299000 | H                                                                                                                                                                         | 0.173398000  | 1.723818000  | 7.587334000  |
| C                                                                                                                                                                         | -1.593357000 | 2.338828000  | 4.190982000  | C                                                                                                                                                                         | -1.766283000 | -0.357477000 | -5.070062000 |
| C                                                                                                                                                                         | -0.318553000 | 2.388722000  | 5.028496000  | C                                                                                                                                                                         | -0.855693000 | 0.844945000  | -5.303041000 |
| C                                                                                                                                                                         | 0.903492000  | 2.526195000  | 4.124741000  | C                                                                                                                                                                         | 0.311022000  | 0.463701000  | -6.210198000 |
| C                                                                                                                                                                         | 0.787253000  | 3.777090000  | 3.258475000  | C                                                                                                                                                                         | -0.204045000 | -0.080529000 | -7.540054000 |
| C                                                                                                                                                                         | -0.487276000 | 3.718306000  | 2.421752000  | C                                                                                                                                                                         | -1.120033000 | -1.279955000 | -7.309551000 |
| C                                                                                                                                                                         | -1.711340000 | 3.588914000  | 3.323413000  | C                                                                                                                                                                         | -2.284574000 | -0.897112000 | -6.400010000 |
| H                                                                                                                                                                         | 1.812729000  | 2.572500000  | 4.729146000  | H                                                                                                                                                                         | 0.945572000  | 1.335554000  | -6.385706000 |
| H                                                                                                                                                                         | -0.364033000 | 3.241722000  | 5.711556000  | H                                                                                                                                                                         | -1.430020000 | 1.647134000  | -5.772161000 |
| H                                                                                                                                                                         | -0.235696000 | 1.481223000  | 5.630582000  | H                                                                                                                                                                         | -0.478848000 | 1.221283000  | -4.349355000 |
| H                                                                                                                                                                         | -1.562357000 | 1.458899000  | 3.545930000  | H                                                                                                                                                                         | -1.208129000 | -1.144024000 | -4.556599000 |
| H                                                                                                                                                                         | -2.466594000 | 2.251840000  | 4.842442000  | H                                                                                                                                                                         | -2.606246000 | -0.070953000 | -4.433640000 |
| H                                                                                                                                                                         | 0.764235000  | 4.664773000  | 3.896701000  | H                                                                                                                                                                         | -0.759523000 | 0.703886000  | -8.060036000 |
| H                                                                                                                                                                         | 1.658726000  | 3.856445000  | 2.604851000  | H                                                                                                                                                                         | 0.636750000  | -0.370959000 | -8.174398000 |
| H                                                                                                                                                                         | -0.571579000 | 4.612860000  | 1.799070000  | H                                                                                                                                                                         | -1.499588000 | -1.646968000 | -8.265896000 |
| H                                                                                                                                                                         | -0.438102000 | 2.847018000  | 1.766410000  | H                                                                                                                                                                         | -0.549665000 | -2.087883000 | -6.844466000 |
| H                                                                                                                                                                         | -1.788066000 | 4.472813000  | 3.962569000  | H                                                                                                                                                                         | -2.890224000 | -0.130664000 | -6.890082000 |
| H                                                                                                                                                                         | -2.618028000 | 3.535116000  | 2.715681000  | H                                                                                                                                                                         | -2.921898000 | -1.766708000 | -6.225738000 |
| H                                                                                                                                                                         | 0.972521000  | 1.650343000  | 3.476806000  | H                                                                                                                                                                         | 0.917899000  | -0.300962000 | -5.718748000 |
| C                                                                                                                                                                         | 1.783475000  | 4.509319000  | -1.593890000 | C                                                                                                                                                                         | -4.345445000 | -5.282526000 | -2.297916000 |
| C                                                                                                                                                                         | 2.407010000  | 5.825226000  | -1.137355000 | C                                                                                                                                                                         | -4.186491000 | -4.001519000 | -3.112252000 |
| C                                                                                                                                                                         | 3.898818000  | 5.641102000  | -0.873119000 | C                                                                                                                                                                         | -5.335775000 | -3.040042000 | -2.820748000 |
| C                                                                                                                                                                         | 4.603986000  | 5.120413000  | -2.123073000 | C                                                                                                                                                                         | -5.395359000 | -2.719474000 | -1.329658000 |
| C                                                                                                                                                                         | 3.975020000  | 3.809152000  | -2.587234000 | C                                                                                                                                                                         | -5.549040000 | -3.999638000 | -0.512773000 |
| C                                                                                                                                                                         | 2.483146000  | 3.996616000  | -2.849891000 | C                                                                                                                                                                         | -4.399638000 | -4.959985000 | -0.807149000 |
| H                                                                                                                                                                         | 4.343328000  | 6.589624000  | -0.562983000 | H                                                                                                                                                                         | -5.207772000 | -2.119225000 | -3.394441000 |
| H                                                                                                                                                                         | 2.265743000  | 6.582475000  | -1.912822000 | H                                                                                                                                                                         | -3.239780000 | -3.523511000 | -2.850150000 |
| H                                                                                                                                                                         | 1.910394000  | 6.177450000  | -0.230494000 | H                                                                                                                                                                         | -4.160130000 | -4.239904000 | -4.178130000 |
| H                                                                                                                                                                         | 1.883407000  | 3.771585000  | -0.794756000 | H                                                                                                                                                                         | -5.268922000 | -5.787279000 | -2.593263000 |
| H                                                                                                                                                                         | 0.719078000  | 4.651853000  | -1.790889000 | H                                                                                                                                                                         | -3.514443000 | -5.960605000 | -2.503355000 |
| H                                                                                                                                                                         | 4.520457000  | 5.862940000  | -2.920738000 | H                                                                                                                                                                         | -4.473291000 | -2.213783000 | -1.035410000 |
| H                                                                                                                                                                         | 5.666791000  | 4.972214000  | -1.916881000 | H                                                                                                                                                                         | -6.229828000 | -2.044647000 | -1.125871000 |
| H                                                                                                                                                                         | 4.473281000  | 3.457284000  | -3.493885000 | H                                                                                                                                                                         | -5.571585000 | -3.761794000 | 0.553277000  |
| H                                                                                                                                                                         | 4.110895000  | 3.049952000  | -1.813457000 | H                                                                                                                                                                         | -6.497070000 | -4.480175000 | -0.767629000 |

|   |              |              |              |   |              |              |              |
|---|--------------|--------------|--------------|---|--------------|--------------|--------------|
| H | 2.345720000  | 4.717417000  | -3.659751000 | H | -3.456744000 | -4.498763000 | -0.503487000 |
| H | 2.039300000  | 3.050217000  | -3.168883000 | H | -4.524941000 | -5.879595000 | -0.230720000 |
| H | 4.031311000  | 4.9227791000 | -0.056075000 | H | -6.278422000 | -3.497935000 | -3.131028000 |
| C | 5.052594000  | 1.793304000  | 1.347654000  | C | 0.154513000  | -6.371973000 | -2.668853000 |
| C | 5.933996000  | 0.730619000  | 0.697301000  | C | 0.481184000  | -5.443392000 | -3.835189000 |
| C | 7.276436000  | 1.326903000  | 0.282333000  | C | 1.143736000  | -4.167405000 | -3.323771000 |
| C | 7.982098000  | 1.943758000  | 1.487038000  | C | 2.408820000  | -4.500749000 | -2.537586000 |
| C | 7.100466000  | 3.008131000  | 2.135403000  | C | 2.081981000  | -5.431094000 | -1.372748000 |
| C | 5.759650000  | 2.408767000  | 2.551396000  | C | 1.418587000  | -6.707805000 | -1.882079000 |
| H | 7.906696000  | 0.552704000  | -0.162173000 | H | 1.390547000  | -3.512590000 | -4.163165000 |
| H | 6.104440000  | -0.081600000 | 1.407392000  | H | 1.157208000  | -5.952624000 | -4.526978000 |
| H | 5.429861000  | 0.309993000  | -0.175613000 | H | -0.432545000 | -5.195877000 | -4.380669000 |
| H | 4.839169000  | 2.578428000  | 0.618198000  | H | -0.559208000 | -5.877642000 | -2.005971000 |
| H | 4.101885000  | 1.355553000  | 1.658301000  | H | -0.308324000 | -7.289321000 | -3.040222000 |
| H | 8.199726000  | 1.160968000  | 2.217997000  | H | 3.129795000  | -4.987758000 | -3.199136000 |
| H | 8.932265000  | 2.385026000  | 1.176295000  | H | 2.867133000  | -3.582331000 | -2.163673000 |
| H | 7.606401000  | 3.429739000  | 3.007145000  | H | 2.994402000  | -5.678436000 | -0.824878000 |
| H | 6.930213000  | 3.819589000  | 1.423211000  | H | 1.402076000  | -4.922586000 | -0.685116000 |
| H | 5.928673000  | 1.635913000  | 3.304765000  | H | 2.116514000  | -7.246413000 | -2.528307000 |
| H | 5.128680000  | 3.179613000  | 2.999624000  | H | 1.170757000  | -7.359405000 | -1.040921000 |
| H | 7.112984000  | 2.098969000  | -0.473704000 | H | 0.443873000  | -3.639763000 | -2.672681000 |
| C | -4.553173000 | 3.779653000  | -2.080546000 | C | 5.513997000  | -2.011703000 | 4.291143000  |
| C | -4.057402000 | 2.818033000  | -3.157423000 | C | 4.802237000  | -3.329906000 | 3.997775000  |
| C | -3.263846000 | 3.570812000  | -4.222169000 | C | 4.124267000  | -3.274806000 | 2.631412000  |
| C | -2.089143000 | 4.310479000  | -3.587412000 | C | 5.147297000  | -2.966118000 | 1.541324000  |
| C | -2.583246000 | 5.272087000  | -2.509588000 | C | 5.853015000  | -1.645110000 | 1.835499000  |
| C | -3.379708000 | 4.521333000  | -1.445516000 | C | 6.534824000  | -1.700139000 | 3.199826000  |
| H | -2.899807000 | 2.872940000  | -4.980204000 | H | 3.627969000  | -4.225131000 | 2.421208000  |
| H | -3.416256000 | 2.062638000  | -2.696943000 | H | 5.529509000  | -4.145624000 | 4.009222000  |
| H | -4.904412000 | 2.304300000  | -3.617894000 | H | 4.059787000  | -3.532070000 | 4.773214000  |
| H | -5.238468000 | 4.502819000  | -2.529360000 | H | 4.776660000  | -1.207008000 | 4.333628000  |
| H | -5.103482000 | 3.229640000  | -1.314026000 | H | 6.010437000  | -2.063696000 | 5.262850000  |
| H | -1.405820000 | 3.584649000  | -3.139884000 | H | 5.886053000  | -3.770232000 | 1.499955000  |
| H | -1.536792000 | 4.860595000  | -4.352766000 | H | 4.655031000  | -2.917958000 | 0.567359000  |
| H | -1.735729000 | 5.783899000  | -2.047586000 | H | 6.589979000  | -1.432622000 | 1.057539000  |
| H | -3.220421000 | 6.031746000  | -2.968889000 | H | 5.117880000  | -0.836766000 | 1.833341000  |
| H | -2.727528000 | 3.803804000  | -0.942081000 | H | 7.303203000  | -2.477283000 | 3.189014000  |
| H | -3.746008000 | 5.222025000  | -0.691930000 | H | 7.026601000  | -0.747664000 | 3.410336000  |
| H | -3.918614000 | 4.290953000  | -4.718587000 | H | 3.362262000  | -2.492200000 | 2.643769000  |
| C | -7.154185000 | -0.209113000 | 0.295458000  | C | 5.677265000  | 3.267897000  | 3.919044000  |
| C | -6.447387000 | -1.191503000 | 1.225667000  | C | 6.405989000  | 3.461413000  | 2.591846000  |
| C | -6.770483000 | -2.629744000 | 0.829231000  | C | 5.446771000  | 3.262565000  | 1.421454000  |
| C | -6.370740000 | -2.886385000 | -0.621464000 | C | 4.262311000  | 4.218817000  | 1.531814000  |
| C | -7.080087000 | -1.905164000 | -1.551078000 | C | 3.535901000  | 4.020637000  | 2.859594000  |
| C | -6.756894000 | -0.466715000 | -1.155758000 | C | 4.497352000  | 4.230207000  | 4.026170000  |
| H | -6.246647000 | -3.325606000 | 1.488330000  | H | 5.973952000  | 3.429676000  | 0.478906000  |
| H | -5.368235000 | -1.031617000 | 1.166863000  | H | 6.821618000  | 4.471468000  | 2.550992000  |
| H | -6.754164000 | -1.011904000 | 2.258392000  | H | 7.236101000  | 2.755109000  | 2.515580000  |
| H | -8.235704000 | -0.325495000 | 0.399925000  | H | 5.310255000  | 2.241101000  | 3.983324000  |
| H | -6.900450000 | 0.815657000  | 0.575853000  | H | 6.367893000  | 3.429575000  | 4.749812000  |
| H | -5.289402000 | -2.765399000 | -0.723141000 | H | 4.621639000  | 5.248780000  | 1.466311000  |
| H | -6.620855000 | -3.912480000 | -0.901469000 | H | 3.572658000  | 4.053912000  | 0.700678000  |
| H | -6.778066000 | -2.083928000 | -2.585712000 | H | 2.699812000  | 4.720206000  | 2.934586000  |
| H | -8.159277000 | -2.063823000 | -1.486825000 | H | 3.133188000  | 3.006255000  | 2.906391000  |
| H | -5.684711000 | -0.292963000 | -1.272969000 | H | 4.865586000  | 5.259250000  | 4.012734000  |
| H | -7.282582000 | 0.228044000  | -1.814874000 | H | 3.974825000  | 4.074399000  | 4.972503000  |
| H | -7.843037000 | -2.804221000 | 0.944775000  | H | 5.081554000  | 2.232802000  | 1.426467000  |
| C | 3.519592000  | -6.707475000 | 0.675468000  | C | -0.284012000 | 5.533844000  | -1.684197000 |
| C | 3.666668000  | -6.287945000 | -0.784878000 | C | 0.285690000  | 5.030878000  | -3.008125000 |
| C | 2.469841000  | -6.769021000 | -1.601092000 | C | 1.182509000  | 6.091924000  | -3.640525000 |
| C | 1.170800000  | -6.217935000 | -1.018973000 | C | 2.309833000  | 6.477539000  | -2.685876000 |
| C | 1.022897000  | -6.625563000 | 0.445248000  | C | 1.740597000  | 6.977680000  | -1.360511000 |
| C | 2.223666000  | -6.154362000 | 1.262323000  | C | 0.844811000  | 5.914797000  | -0.730114000 |
| H | 2.576085000  | -6.452646000 | -2.641588000 | H | 1.599727000  | 5.716255000  | -4.577949000 |
| H | 3.731423000  | -5.198395000 | -0.842320000 | H | 0.873681000  | 4.126657000  | -2.831466000 |
| H | 4.589199000  | -6.700659000 | -1.199282000 | H | -0.527393000 | 4.775070000  | -3.690986000 |
| H | 3.508920000  | -7.798203000 | 0.739107000  | H | -0.907648000 | 6.411073000  | -1.871054000 |
| H | 4.373687000  | -6.347786000 | 1.253468000  | H | -0.916965000 | 4.768460000  | -1.230182000 |
| H | 1.180579000  | -5.127510000 | -1.094715000 | H | 2.942473000  | 5.605663000  | -2.500829000 |
| H | 0.318814000  | -6.586549000 | -1.594953000 | H | 2.933167000  | 7.251650000  | -3.139392000 |
| H | 0.101730000  | -6.207735000 | 0.859215000  | H | 2.554893000  | 7.231734000  | -0.678030000 |
| H | 0.950478000  | -7.713815000 | 0.508596000  | H | 1.156702000  | 7.884266000  | -1.536636000 |
| H | 2.265212000  | -5.062536000 | 1.258770000  | H | 1.444262000  | 5.029243000  | -0.505597000 |
| H | 2.116303000  | -6.477706000 | 2.299957000  | H | 0.429976000  | 6.285267000  | 0.209936000  |
| H | 2.438054000  | -7.860919000 | -1.585957000 | H | 0.586056000  | 6.977658000  | -3.871878000 |
| C | -2.441614000 | -3.896725000 | 3.315156000  | C | -6.515205000 | 2.977678000  | -1.675045000 |
| C | -2.708164000 | -5.053515000 | 4.274319000  | C | -5.918290000 | 1.820806000  | -2.471775000 |
| C | -2.032966000 | -4.796695000 | 5.618699000  | C | -5.370393000 | 2.318370000  | -3.806625000 |
| C | -2.518090000 | -3.478858000 | 6.217513000  | C | -4.325956000 | 3.408124000  | -3.580517000 |
| C | -2.257022000 | -2.323681000 | 5.254704000  | C | -4.927630000 | 4.566082000  | -2.789275000 |
| C | -2.934385000 | -2.581131000 | 3.912123000  | C | -5.471152000 | 4.068777000  | -1.452543000 |
| H | -2.246050000 | -5.619530000 | 6.305531000  | H | -4.930294000 | 1.487141000  | -4.362776000 |
| H | -3.785942000 | -5.158094000 | 4.424024000  | H | -5.109223000 | 1.367328000  | -1.894837000 |
| H | -2.337938000 | -5.987886000 | 3.844475000  | H | -6.679134000 | 1.055935000  | -2.644015000 |
| H | -1.367406000 | -3.822573000 | 3.130815000  | H | -7.363517000 | 3.394822000  | -2.223836000 |
| H | -2.940640000 | -4.088468000 | 2.360892000  | H | -6.885183000 | 2.614527000  | -0.713699000 |

|                                                                                                                                                                        |              |              |              |                                                                                                                                                                        |              |              |              |
|------------------------------------------------------------------------------------------------------------------------------------------------------------------------|--------------|--------------|--------------|------------------------------------------------------------------------------------------------------------------------------------------------------------------------|--------------|--------------|--------------|
| H                                                                                                                                                                      | -3.590590000 | -3.546724000 | 6.418497000  | H                                                                                                                                                                      | -3.484545000 | 2.992631000  | -3.021503000 |
| H                                                                                                                                                                      | -2.011925000 | -3.293748000 | 7.167881000  | H                                                                                                                                                                      | -3.949065000 | 3.768672000  | -4.540627000 |
| H                                                                                                                                                                      | -2.626206000 | -1.389220000 | 5.683120000  | H                                                                                                                                                                      | -4.169939000 | 5.334128000  | -2.619773000 |
| H                                                                                                                                                                      | -1.182496000 | -2.215423000 | 5.094894000  | H                                                                                                                                                                      | -5.738788000 | 5.016917000  | -3.366847000 |
| H                                                                                                                                                                      | -4.017217000 | -2.626928000 | 4.053132000  | H                                                                                                                                                                      | -4.648085000 | 3.668423000  | -0.856452000 |
| H                                                                                                                                                                      | -2.716663000 | -1.755228000 | 3.232426000  | H                                                                                                                                                                      | -5.914115000 | 4.899511000  | -0.898239000 |
| H                                                                                                                                                                      | -0.951081000 | -4.751961000 | 5.474717000  | H                                                                                                                                                                      | -6.190197000 | 2.721995000  | -4.406195000 |
| C                                                                                                                                                                      | 5.808379000  | -3.241588000 | -3.937639000 | C                                                                                                                                                                      | -4.623895000 | 0.628656000  | 2.125380000  |
| C                                                                                                                                                                      | 5.902155000  | -2.009881000 | -3.041022000 | C                                                                                                                                                                      | -5.126484000 | 1.671857000  | 3.119682000  |
| C                                                                                                                                                                      | 5.794131000  | -0.734314000 | -3.872590000 | C                                                                                                                                                                      | -6.045245000 | 1.028347000  | 4.154732000  |
| C                                                                                                                                                                      | 4.489108000  | -0.720749000 | -4.664510000 | C                                                                                                                                                                      | -5.320264000 | -0.099214000 | 4.885219000  |
| C                                                                                                                                                                      | 4.395307000  | -1.954317000 | -5.559026000 | C                                                                                                                                                                      | -4.819551000 | -1.142907000 | 3.890527000  |
| C                                                                                                                                                                      | 4.500891000  | -3.228826000 | -4.725360000 | C                                                                                                                                                                      | -3.899270000 | -0.497990000 | 2.857704000  |
| H                                                                                                                                                                      | 5.844635000  | 0.141422000  | -3.222059000 | H                                                                                                                                                                      | -6.382513000 | 1.780198000  | 4.872043000  |
| H                                                                                                                                                                      | 5.091909000  | -2.034731000 | -2.308053000 | H                                                                                                                                                                      | -4.272588000 | 2.127839000  | 3.627125000  |
| H                                                                                                                                                                      | 6.847352000  | -2.018210000 | -2.493917000 | H                                                                                                                                                                      | -5.658675000 | 2.463962000  | 2.588571000  |
| H                                                                                                                                                                      | 6.649393000  | -3.245711000 | -4.635005000 | H                                                                                                                                                                      | -5.471356000 | 0.213841000  | 1.574568000  |
| H                                                                                                                                                                      | 5.871640000  | -4.149215000 | -3.333401000 | H                                                                                                                                                                      | -3.956975000 | 1.105275000  | 1.404305000  |
| H                                                                                                                                                                      | 3.645712000  | -0.711507000 | -3.969533000 | H                                                                                                                                                                      | -4.471070000 | 0.313231000  | 5.435847000  |
| H                                                                                                                                                                      | 4.431245000  | 0.185420000  | -5.271918000 | H                                                                                                                                                                      | -5.991847000 | -0.567375000 | 5.608624000  |
| H                                                                                                                                                                      | 3.453060000  | -1.945765000 | -6.112082000 | H                                                                                                                                                                      | -4.287922000 | -1.937590000 | 4.419605000  |
| H                                                                                                                                                                      | 5.208570000  | -1.932831000 | -6.288294000 | H                                                                                                                                                                      | -5.673856000 | -1.594609000 | 3.380291000  |
| H                                                                                                                                                                      | 3.659608000  | -3.278367000 | -4.029460000 | H                                                                                                                                                                      | -3.021398000 | -0.091922000 | 3.366701000  |
| H                                                                                                                                                                      | 4.448664000  | -4.104923000 | -5.375814000 | H                                                                                                                                                                      | -3.561168000 | -1.255740000 | 2.146149000  |
| H                                                                                                                                                                      | 6.637010000  | -0.683152000 | -4.565728000 | H                                                                                                                                                                      | -6.928397000 | 0.624859000  | 3.653044000  |
| C                                                                                                                                                                      | 4.191654000  | -1.074918000 | 5.519548000  | C                                                                                                                                                                      | 5.915546000  | 2.119413000  | -4.216053000 |
| C                                                                                                                                                                      | 4.495615000  | -2.026128000 | 4.365316000  | C                                                                                                                                                                      | 6.583567000  | 0.778907000  | -3.920943000 |
| C                                                                                                                                                                      | 4.307138000  | -3.476811000 | 4.801443000  | C                                                                                                                                                                      | 6.034527000  | 0.180335000  | -2.628557000 |
| C                                                                                                                                                                      | 2.887349000  | -3.697474000 | 5.316154000  | C                                                                                                                                                                      | 4.519125000  | 0.018860000  | -2.713905000 |
| C                                                                                                                                                                      | 2.593025000  | -2.751325000 | 6.477027000  | C                                                                                                                                                                      | 3.852606000  | 1.359265000  | -3.012921000 |
| C                                                                                                                                                                      | 2.772681000  | -1.302297000 | 6.033106000  | C                                                                                                                                                                      | 4.401635000  | 1.950188000  | -4.308576000 |
| H                                                                                                                                                                      | 4.509038000  | -4.147613000 | 3.962843000  | H                                                                                                                                                                      | 6.500230000  | -0.789853000 | -2.441168000 |
| H                                                                                                                                                                      | 3.818712000  | -1.806704000 | 3.536658000  | H                                                                                                                                                                      | 6.392878000  | 0.090540000  | -4.748069000 |
| H                                                                                                                                                                      | 5.520120000  | -1.875135000 | 4.016259000  | H                                                                                                                                                                      | 7.664695000  | 0.911700000  | -3.839152000 |
| H                                                                                                                                                                      | 4.904863000  | -1.246352000 | 6.330296000  | H                                                                                                                                                                      | 6.153145000  | 2.826228000  | -3.417027000 |
| H                                                                                                                                                                      | 4.301861000  | -0.040337000 | 5.187564000  | H                                                                                                                                                                      | 6.301932000  | 2.530158000  | -5.151525000 |
| H                                                                                                                                                                      | 2.178220000  | -3.505224000 | 4.507853000  | H                                                                                                                                                                      | 4.275387000  | -0.689711000 | -3.509259000 |
| H                                                                                                                                                                      | 2.763127000  | -4.735113000 | 5.636285000  | H                                                                                                                                                                      | 4.139444000  | -0.387902000 | -1.773609000 |
| H                                                                                                                                                                      | 1.574506000  | -2.906830000 | 6.839099000  | H                                                                                                                                                                      | 2.771163000  | 1.227187000  | -3.096622000 |
| H                                                                                                                                                                      | 3.276440000  | -2.966750000 | 7.302811000  | H                                                                                                                                                                      | 4.046896000  | 2.051991000  | -2.190206000 |
| H                                                                                                                                                                      | 2.063746000  | -1.080096000 | 5.232935000  | H                                                                                                                                                                      | 4.163337000  | 1.282064000  | -5.139644000 |
| H                                                                                                                                                                      | 2.563820000  | -0.626324000 | 6.865508000  | H                                                                                                                                                                      | 3.929530000  | 2.914622000  | -4.509045000 |
| H                                                                                                                                                                      | 5.020561000  | -3.711869000 | 5.595709000  | H                                                                                                                                                                      | 6.281913000  | 0.837539000  | -1.791461000 |
| <b><math>S_{\text{ax}}(\text{toluene})</math></b><br><b>Energy (hartrees) = -533.224439</b><br><b>Lowest harmonic vibrational frequency (cm<sup>-1</sup>) = 111.66</b> |              |              |              | <b><math>S_{\text{eq}}(\text{toluene})</math></b><br><b>Energy (hartrees) = -533.227175</b><br><b>Lowest harmonic vibrational frequency (cm<sup>-1</sup>) = 164.62</b> |              |              |              |
| F                                                                                                                                                                      | 0.137234000  | -0.406630000 | 2.048631000  | C                                                                                                                                                                      | -0.517338000 | 0.938497000  | -0.497856000 |
| F                                                                                                                                                                      | -1.567294000 | 1.416688000  | 0.386049000  | C                                                                                                                                                                      | -1.058605000 | -0.473653000 | -0.348613000 |
| F                                                                                                                                                                      | 1.338747000  | 1.530786000  | 0.131635000  | H                                                                                                                                                                      | -1.999854000 | -0.571770000 | -0.890701000 |
| C                                                                                                                                                                      | 0.062493000  | -1.184029000 | 0.879261000  | H                                                                                                                                                                      | -1.249708000 | -0.666374000 | 0.710782000  |
| H                                                                                                                                                                      | 0.142228000  | -2.225167000 | 1.202215000  | C                                                                                                                                                                      | -0.038563000 | -1.474415000 | -0.862090000 |
| C                                                                                                                                                                      | -1.289926000 | -0.955387000 | 0.222094000  | C                                                                                                                                                                      | 1.301830000  | -1.333725000 | -0.165518000 |
| H                                                                                                                                                                      | -2.082538000 | -1.028368000 | 0.969391000  | H                                                                                                                                                                      | 1.174750000  | -1.540330000 | 0.900980000  |
| H                                                                                                                                                                      | -1.453451000 | -1.757941000 | -0.503433000 | H                                                                                                                                                                      | 2.018840000  | -2.045586000 | -0.574647000 |
| C                                                                                                                                                                      | -1.420543000 | 0.358435000  | -0.530772000 | C                                                                                                                                                                      | 1.816724000  | 0.083996000  | -0.336269000 |
| H                                                                                                                                                                      | -2.339608000 | 0.343632000  | -1.122061000 | C                                                                                                                                                                      | 0.830784000  | 1.118596000  | 0.179457000  |
| C                                                                                                                                                                      | -0.233122000 | 0.647159000  | -1.433444000 | H                                                                                                                                                                      | 1.203057000  | 2.128549000  | 0.002697000  |
| H                                                                                                                                                                      | -0.279429000 | -0.046772000 | -2.278277000 | H                                                                                                                                                                      | 0.703729000  | 0.982644000  | 1.257286000  |
| H                                                                                                                                                                      | -0.305740000 | 1.655239000  | -1.843608000 | F                                                                                                                                                                      | -0.529476000 | -2.774607000 | -0.648700000 |
| C                                                                                                                                                                      | 1.118660000  | 0.468612000  | -0.764630000 | F                                                                                                                                                                      | 3.020074000  | 0.211228000  | 0.377571000  |
| H                                                                                                                                                                      | 1.906473000  | 0.545404000  | -1.518033000 | F                                                                                                                                                                      | -1.431214000 | 1.828398000  | 0.082556000  |
| C                                                                                                                                                                      | 1.242648000  | -0.851251000 | -0.020634000 | H                                                                                                                                                                      | -0.451531000 | 1.211451000  | -1.556825000 |
| H                                                                                                                                                                      | 2.164496000  | -0.872224000 | 0.563809000  | H                                                                                                                                                                      | 0.085259000  | -1.373984000 | -1.943680000 |
| H                                                                                                                                                                      | 1.324401000  | -1.647063000 | -0.767233000 | H                                                                                                                                                                      | 2.060832000  | 0.277742000  | -1.386908000 |
| C                                                                                                                                                                      | 0.823091000  | -1.704032000 | -4.293787000 | C                                                                                                                                                                      | -1.010546000 | -1.482349000 | -4.313803000 |
| C                                                                                                                                                                      | 1.080570000  | -2.640434000 | -3.298519000 | C                                                                                                                                                                      | -0.908862000 | -0.104167000 | -4.170748000 |
| C                                                                                                                                                                      | 0.045190000  | -3.232604000 | -2.596117000 | C                                                                                                                                                                      | 0.328973000  | 0.517794000  | -4.152605000 |
| C                                                                                                                                                                      | -1.268462000 | -2.896070000 | -2.880345000 | C                                                                                                                                                                      | 1.486202000  | -0.232831000 | -4.273128000 |
| C                                                                                                                                                                      | -1.537546000 | -1.957594000 | -3.862762000 | C                                                                                                                                                                      | 1.396077000  | -1.607774000 | -4.424943000 |
| C                                                                                                                                                                      | -0.498830000 | -1.367372000 | -4.563296000 | C                                                                                                                                                                      | 0.158582000  | -2.226326000 | -4.447559000 |
| H                                                                                                                                                                      | 2.103064000  | -2.911780000 | -3.075113000 | H                                                                                                                                                                      | -1.802716000 | 0.493461000  | -4.071090000 |
| H                                                                                                                                                                      | 0.264359000  | -3.956443000 | -1.824153000 | H                                                                                                                                                                      | 0.388473000  | 1.591514000  | -4.046666000 |
| H                                                                                                                                                                      | -2.080350000 | -3.364785000 | -2.343503000 | H                                                                                                                                                                      | 2.450225000  | 0.253472000  | -4.256905000 |
| H                                                                                                                                                                      | -2.559151000 | -1.683686000 | -4.081742000 | H                                                                                                                                                                      | 2.294758000  | -2.198405000 | -4.528300000 |
| H                                                                                                                                                                      | -0.714707000 | -0.637207000 | -5.330823000 | H                                                                                                                                                                      | 0.092965000  | -3.298844000 | -4.564832000 |
| C                                                                                                                                                                      | 1.950740000  | -1.059478000 | -5.039322000 | C                                                                                                                                                                      | -2.342801000 | -2.168984000 | -4.295568000 |
| H                                                                                                                                                                      | 2.358388000  | -0.233479000 | -4.454956000 | H                                                                                                                                                                      | -3.153560000 | -1.444460000 | -4.299116000 |
| H                                                                                                                                                                      | 2.752081000  | -1.773749000 | -5.216554000 | H                                                                                                                                                                      | -2.450812000 | -2.821831000 | -5.160361000 |
| H                                                                                                                                                                      | 1.610940000  | -0.666183000 | -5.994339000 | H                                                                                                                                                                      | -2.428748000 | -2.785318000 | -3.399934000 |
| C                                                                                                                                                                      | -4.575436000 | 3.057842000  | -2.225278000 | C                                                                                                                                                                      | 1.527140000  | -0.963668000 | 3.630645000  |
| C                                                                                                                                                                      | -5.641932000 | 2.619965000  | -3.001638000 | C                                                                                                                                                                      | 1.067688000  | 0.330797000  | 3.846424000  |
| C                                                                                                                                                                      | -5.439868000 | 1.730714000  | -4.043525000 | C                                                                                                                                                                      | -0.272725000 | 0.643480000  | 3.692457000  |
| C                                                                                                                                                                      | -4.165184000 | 1.267228000  | -4.324982000 | C                                                                                                                                                                      | -1.177128000 | -0.337611000 | 3.320191000  |
| C                                                                                                                                                                      | -3.094662000 | 1.695154000  | -3.557295000 | C                                                                                                                                                                      | -0.733936000 | -1.634572000 | 3.115587000  |
| C                                                                                                                                                                      | -3.302012000 | 2.582151000  | -2.515113000 | C                                                                                                                                                                      | 0.607465000  | -1.942866000 | 3.270164000  |



|   |              |              |              |   |              |              |              |
|---|--------------|--------------|--------------|---|--------------|--------------|--------------|
| H | -6.640110000 | 2.977501000  | -2.788377000 | H | 1.772165000  | 1.098679000  | 4.135136000  |
| H | -6.280363000 | 1.397324000  | -4.635775000 | H | -0.614875000 | 1.654503000  | 3.858925000  |
| H | -4.007903000 | 0.574796000  | -5.139680000 | H | -2.221364000 | -0.095388000 | 3.193096000  |
| H | -2.096383000 | 1.339535000  | -3.769876000 | H | -1.431649000 | -2.410618000 | 2.834537000  |
| H | -2.467678000 | 2.912170000  | -1.913527000 | H | 0.942914000  | -2.956942000 | 3.105431000  |
| C | -4.778898000 | 4.037428000  | -1.108320000 | C | 2.987055000  | -1.281946000 | 3.741275000  |
| H | -5.801809000 | 4.005946000  | -0.739455000 | H | 3.476866000  | -1.075808000 | 2.787965000  |
| H | -4.097620000 | 3.828188000  | -0.286131000 | H | 3.462881000  | -0.669129000 | 4.504066000  |
| H | -4.579138000 | 5.050169000  | -1.461706000 | H | 3.141419000  | -2.331291000 | 3.981355000  |
| C | -4.916610000 | -0.782644000 | 0.061832000  | C | 2.599912000  | -4.600648000 | -1.118183000 |
| C | -4.847357000 | -1.116159000 | -1.285569000 | C | 3.657084000  | -3.802766000 | -1.538584000 |
| C | -4.692866000 | -2.434325000 | -1.680065000 | C | 4.534811000  | -3.246178000 | -0.621854000 |
| C | -4.599106000 | -3.438724000 | -0.731478000 | C | 4.367278000  | -3.481709000 | 0.731650000  |
| C | -4.658706000 | -3.116050000 | 0.614855000  | C | 3.318682000  | -4.278775000 | 1.161738000  |
| C | -4.814563000 | -1.798146000 | 1.006961000  | C | 2.443905000  | -4.832099000 | 0.244842000  |
| H | -4.927685000 | -0.337376000 | -2.031670000 | H | 3.795196000  | -3.612460000 | -2.594089000 |
| H | -4.658852000 | -2.679310000 | -2.732350000 | H | 5.349922000  | -2.625898000 | -0.966050000 |
| H | -4.487776000 | -4.469847000 | -1.036468000 | H | 5.051855000  | -3.049555000 | 1.446557000  |
| H | -4.592993000 | -3.897392000 | 1.358884000  | H | 3.187833000  | -4.473445000 | 2.216834000  |
| H | -4.865891000 | -1.548088000 | 2.057909000  | H | 1.625826000  | -5.451406000 | 0.583027000  |
| C | -5.090252000 | 0.640535000  | 0.492788000  | C | 1.625580000  | -5.181857000 | -2.097177000 |
| H | -5.534981000 | 1.232039000  | -0.303429000 | H | 1.982318000  | -5.068702000 | -3.118097000 |
| H | -5.715691000 | 0.699380000  | 1.381118000  | H | 1.462885000  | -6.239263000 | -1.895380000 |
| H | -4.123794000 | 1.076795000  | 0.743986000  | H | 0.665759000  | -4.673082000 | -2.005547000 |
| C | -1.181301000 | -4.969965000 | 2.132943000  | C | 2.372588000  | 4.129046000  | 1.521627000  |
| C | -0.449619000 | -6.034790000 | 2.650020000  | C | 2.413686000  | 4.926269000  | 0.384667000  |
| C | 0.024377000  | -7.037385000 | 1.823059000  | C | 1.275416000  | 5.576038000  | -0.064056000 |
| C | -0.231901000 | -6.993674000 | 0.461898000  | C | 0.079139000  | 5.438394000  | 0.618878000  |
| C | -0.959741000 | -5.939725000 | -0.063291000 | C | 0.025917000  | 4.648325000  | 1.755931000  |
| C | -1.425005000 | -4.932185000 | 0.765937000  | C | 1.164767000  | 4.002206000  | 2.200848000  |
| H | -0.250894000 | -6.076443000 | 3.712300000  | H | 3.343234000  | 5.042664000  | -0.155641000 |
| H | 0.593863000  | -7.855551000 | 2.240180000  | H | 1.326770000  | 6.196554000  | -0.948148000 |
| H | 0.133473000  | -7.778397000 | -0.184447000 | H | -0.806757000 | 5.949446000  | 0.270832000  |
| H | -1.170304000 | -5.904098000 | -1.123072000 | H | -0.903003000 | 4.537751000  | 2.295800000  |
| H | -1.991639000 | -4.110668000 | 0.349952000  | H | 1.120220000  | 3.389962000  | 3.089949000  |
| C | -1.689262000 | -3.892456000 | 3.042460000  | C | 3.592289000  | 3.401542000  | 2.004068000  |
| H | -2.281426000 | -4.326818000 | 3.847551000  | H | 4.489525000  | 3.781207000  | 1.520517000  |
| H | -0.856321000 | -3.357274000 | 3.499569000  | H | 3.701987000  | 3.510152000  | 3.081833000  |
| H | -2.307247000 | -3.181547000 | 2.499071000  | H | 3.508070000  | 2.336503000  | 1.783266000  |
| C | 2.980730000  | -3.291123000 | 1.858833000  | C | -4.416004000 | -1.675487000 | 0.202262000  |
| C | 4.129157000  | -2.575495000 | 1.536238000  | C | -4.770290000 | -0.601351000 | -0.603940000 |
| C | 4.708489000  | -2.692236000 | 0.285645000  | C | -5.128579000 | 0.615495000  | -0.048128000 |
| C | 4.149959000  | -3.534038000 | -0.663056000 | C | -5.141825000 | 0.773282000  | 1.326306000  |
| C | 3.007394000  | -4.251398000 | -0.352450000 | C | -4.780860000 | -0.287980000 | 2.140763000  |
| C | 2.425152000  | -4.126823000 | 0.897873000  | C | -4.417283000 | -1.500332000 | 1.582340000  |
| H | 4.572490000  | -1.925586000 | 2.275657000  | H | -4.774681000 | -0.724324000 | -1.679455000 |
| H | 5.600796000  | -2.128273000 | 0.053701000  | H | -5.407264000 | 1.440604000  | -0.688802000 |
| H | 4.612190000  | -3.638637000 | -1.634781000 | H | -5.430525000 | 1.716538000  | 1.765284000  |
| H | 2.571565000  | -4.920693000 | -1.081079000 | H | -4.788249000 | -0.166291000 | 3.215226000  |
| H | 1.537456000  | -4.696406000 | 1.131903000  | H | -4.134952000 | -2.326940000 | 2.220412000  |
| C | 2.356527000  | -3.143597000 | 3.213184000  | C | -4.036419000 | -2.998378000 | -0.392314000 |
| H | 3.120004000  | -3.096813000 | 3.987047000  | H | -4.234062000 | -3.016610000 | -1.461865000 |
| H | 1.786052000  | -2.215729000 | 3.265802000  | H | -2.977643000 | -3.196988000 | -0.229894000 |
| H | 1.686705000  | -3.973503000 | 3.425919000  | H | -4.602300000 | -3.800522000 | 0.078363000  |
| C | 0.541871000  | 4.015463000  | -2.602594000 | C | -3.141966000 | 2.829895000  | -3.943797000 |
| C | 1.768890000  | 3.364173000  | -2.694030000 | C | -2.553310000 | 3.481892000  | -5.021826000 |
| C | 2.129286000  | 2.690884000  | -3.846675000 | C | -1.460150000 | 4.309064000  | -4.835970000 |
| C | 1.265082000  | 2.656075000  | -4.929733000 | C | -0.936651000 | 4.494778000  | -3.566928000 |
| C | 0.044489000  | 3.303359000  | -4.852086000 | C | -1.506742000 | 3.840533000  | -2.488538000 |
| C | -0.312005000 | 3.981246000  | -3.697832000 | C | -2.602363000 | 3.014962000  | -2.677090000 |
| H | 2.442052000  | 3.383564000  | -1.849506000 | H | -2.958258000 | 3.341232000  | -6.014590000 |
| H | 3.089955000  | 2.198527000  | -3.900459000 | H | -1.017859000 | 4.812543000  | -5.684343000 |
| H | 1.547561000  | 2.133563000  | -5.831987000 | H | -0.089483000 | 5.149200000  | -3.418944000 |
| H | -0.635148000 | 3.285728000  | -5.692336000 | H | -1.101116000 | 3.972833000  | -1.495599000 |
| H | -1.266501000 | 4.486943000  | -3.651208000 | H | -3.040147000 | 2.509390000  | -1.827843000 |
| C | 0.160570000  | 4.720486000  | -1.335360000 | C | -4.347620000 | 1.959668000  | -4.147762000 |
| H | 0.146474000  | 4.016260000  | -0.502970000 | H | -4.259746000 | 1.381470000  | -5.066653000 |
| H | 0.889150000  | 5.494766000  | -1.097484000 | H | -4.482672000 | 1.280916000  | -3.308083000 |
| H | -0.820906000 | 5.181342000  | -1.422109000 | H | -5.242395000 | 2.578332000  | -4.229585000 |
| C | -3.746883000 | 1.705287000  | 3.565913000  | C | -3.798272000 | 4.185894000  | 2.395416000  |
| C | -2.632583000 | 0.880409000  | 3.479995000  | C | -3.250421000 | 3.033056000  | 2.946496000  |
| C | -2.667164000 | -0.409197000 | 3.979749000  | C | -3.371128000 | 2.772376000  | 4.301049000  |
| C | -3.818883000 | -0.894143000 | 4.576267000  | C | -4.031729000 | 3.667975000  | 5.124709000  |
| C | -4.934624000 | -0.078709000 | 4.672349000  | C | -4.573289000 | 4.823812000  | 4.587736000  |
| C | -4.896844000 | 1.210810000  | 4.170705000  | C | -4.458893000 | 5.077943000  | 3.232298000  |
| H | -1.731781000 | 1.244198000  | 3.008772000  | H | -2.731050000 | 2.337930000  | 2.302199000  |
| H | -1.787401000 | -1.029864000 | 3.901226000  | H | -2.954719000 | 1.867604000  | 4.720895000  |
| H | -3.852144000 | -1.903832000 | 4.961953000  | H | -4.122154000 | 3.463852000  | 6.181454000  |
| H | -5.838335000 | -0.449816000 | 5.136042000  | H | -5.088182000 | 5.528538000  | 5.225858000  |
| H | -5.772479000 | 1.841499000  | 4.247029000  | H | -4.887235000 | 5.979852000  | 2.816006000  |
| C | -3.702174000 | 3.103646000  | 3.026955000  | C | -3.701299000 | 4.451651000  | 0.923013000  |
| H | -3.456020000 | 3.804337000  | 3.826055000  | H | -2.942909000 | 3.820433000  | 0.468766000  |
| H | -2.939164000 | 3.188506000  | 2.256157000  | H | -4.657079000 | 4.239346000  | 0.442016000  |
| H | -4.666183000 | 3.392386000  | 2.612192000  | H | -3.461750000 | 5.496582000  | 0.732384000  |
| C | 3.742297000  | 0.522739000  | 3.804312000  | C | -1.798889000 | -5.411868000 | 2.374281000  |
| C | 4.564600000  | -0.205613000 | 4.656941000  | C | -3.106352000 | -5.177952000 | 2.780707000  |

|                                                                                                                                                                    |              |              |              |                                                                                                                                                                    |              |              |              |
|--------------------------------------------------------------------------------------------------------------------------------------------------------------------|--------------|--------------|--------------|--------------------------------------------------------------------------------------------------------------------------------------------------------------------|--------------|--------------|--------------|
| C                                                                                                                                                                  | 5.888846000  | -0.442835000 | 4.332431000  | C                                                                                                                                                                  | -3.392686000 | -4.846030000 | 4.094198000  |
| C                                                                                                                                                                  | 6.411331000  | 0.044349000  | 3.145198000  | C                                                                                                                                                                  | -2.372359000 | -4.737363000 | 5.023475000  |
| C                                                                                                                                                                  | 5.599860000  | 0.764556000  | 2.284431000  | C                                                                                                                                                                  | -1.063893000 | -4.964638000 | 4.629166000  |
| C                                                                                                                                                                  | 4.275675000  | 1.000475000  | 2.613472000  | C                                                                                                                                                                  | -0.782483000 | -5.302134000 | 3.317449000  |
| H                                                                                                                                                                  | 4.157525000  | -0.591328000 | 5.581133000  | H                                                                                                                                                                  | -3.911060000 | -5.266316000 | 2.063763000  |
| H                                                                                                                                                                  | 6.515774000  | -1.011410000 | 5.005278000  | H                                                                                                                                                                  | -4.418429000 | -4.680702000 | 4.394513000  |
| H                                                                                                                                                                  | 7.444801000  | -0.141429000 | 2.889631000  | H                                                                                                                                                                  | -2.596563000 | -4.481933000 | 6.049056000  |
| H                                                                                                                                                                  | 6.001666000  | 1.138052000  | 1.353414000  | H                                                                                                                                                                  | -0.261640000 | -4.882443000 | 5.349188000  |
| H                                                                                                                                                                  | 3.638644000  | 1.561007000  | 1.942771000  | H                                                                                                                                                                  | 0.239418000  | -5.490368000 | 3.016887000  |
| C                                                                                                                                                                  | 2.319822000  | 0.804845000  | 4.177315000  | C                                                                                                                                                                  | -1.478938000 | -5.767797000 | 0.953918000  |
| H                                                                                                                                                                  | 1.878890000  | -0.048252000 | 4.688738000  | H                                                                                                                                                                  | -2.379556000 | -6.031983000 | 0.404721000  |
| H                                                                                                                                                                  | 2.276861000  | 1.660066000  | 4.853485000  | H                                                                                                                                                                  | -1.007187000 | -4.922058000 | 0.453274000  |
| H                                                                                                                                                                  | 1.723740000  | 1.037315000  | 3.299030000  | H                                                                                                                                                                  | -0.788438000 | -6.609301000 | 0.917179000  |
| C                                                                                                                                                                  | 5.235133000  | 2.160525000  | -1.724992000 | C                                                                                                                                                                  | 4.592212000  | 1.947187000  | -2.786612000 |
| C                                                                                                                                                                  | 4.626710000  | 0.954538000  | -1.400086000 | C                                                                                                                                                                  | 4.648372000  | 2.065776000  | -4.170191000 |
| C                                                                                                                                                                  | 4.600904000  | -0.093442000 | -2.305516000 | C                                                                                                                                                                  | 3.671433000  | 2.763452000  | -4.860758000 |
| C                                                                                                                                                                  | 5.198895000  | 0.046404000  | -3.546341000 | C                                                                                                                                                                  | 2.618764000  | 3.347776000  | -4.176621000 |
| C                                                                                                                                                                  | 5.815764000  | 1.241974000  | -3.878653000 | C                                                                                                                                                                  | 2.553345000  | 3.237158000  | -2.797402000 |
| C                                                                                                                                                                  | 5.829263000  | 2.290558000  | -2.976080000 | C                                                                                                                                                                  | 3.537250000  | 2.548815000  | -2.109965000 |
| H                                                                                                                                                                  | 4.167591000  | 0.830814000  | -0.429875000 | H                                                                                                                                                                  | 5.463233000  | 1.605679000  | -4.712556000 |
| H                                                                                                                                                                  | 4.112434000  | -1.018890000 | -2.035002000 | H                                                                                                                                                                  | 3.728612000  | 2.845271000  | -5.936960000 |
| H                                                                                                                                                                  | 5.185846000  | -0.770486000 | -4.253204000 | H                                                                                                                                                                  | 1.851482000  | 3.882830000  | -4.717290000 |
| H                                                                                                                                                                  | 6.282918000  | 1.358984000  | -4.846254000 | H                                                                                                                                                                  | 1.734498000  | 3.686552000  | -2.253388000 |
| H                                                                                                                                                                  | 6.304352000  | 3.224215000  | -3.243769000 | H                                                                                                                                                                  | 3.491709000  | 2.475054000  | -1.033300000 |
| C                                                                                                                                                                  | 5.266032000  | 3.299139000  | -0.749460000 | C                                                                                                                                                                  | 5.648752000  | 1.200948000  | -2.028556000 |
| H                                                                                                                                                                  | 4.503375000  | 3.177986000  | 0.016805000  | H                                                                                                                                                                  | 6.130176000  | 0.457266000  | -2.660137000 |
| H                                                                                                                                                                  | 6.238186000  | 3.345740000  | -0.256226000 | H                                                                                                                                                                  | 6.415245000  | 1.893544000  | -1.678191000 |
| H                                                                                                                                                                  | 5.108360000  | 4.247771000  | -1.260243000 | H                                                                                                                                                                  | 5.219759000  | 0.708091000  | -1.158262000 |
| C                                                                                                                                                                  | 0.195042000  | -1.236139000 | 6.770342000  | C                                                                                                                                                                  | -2.154362000 | -0.209379000 | 6.863691000  |
| C                                                                                                                                                                  | 1.537218000  | -1.286690000 | 7.129609000  | C                                                                                                                                                                  | -2.590910000 | -1.244446000 | 6.047075000  |
| C                                                                                                                                                                  | 2.241993000  | -2.476852000 | 7.074574000  | C                                                                                                                                                                  | -3.929762000 | -1.370264000 | 5.719292000  |
| C                                                                                                                                                                  | 1.613869000  | -3.638875000 | 6.659872000  | C                                                                                                                                                                  | -4.855978000 | -0.468005000 | 6.214048000  |
| C                                                                                                                                                                  | 0.275856000  | -3.601620000 | 6.305992000  | C                                                                                                                                                                  | -4.434100000 | 0.558724000  | 7.042391000  |
| C                                                                                                                                                                  | -0.426026000 | -2.410282000 | 6.361240000  | C                                                                                                                                                                  | -3.093522000 | 0.687659000  | 7.360802000  |
| H                                                                                                                                                                  | 2.032523000  | -0.383649000 | 7.460197000  | H                                                                                                                                                                  | -1.875514000 | -1.954149000 | 5.657051000  |
| H                                                                                                                                                                  | 3.284205000  | -2.500464000 | 7.361919000  | H                                                                                                                                                                  | -4.246985000 | -2.176361000 | 5.073492000  |
| H                                                                                                                                                                  | 2.162807000  | -4.568678000 | 6.618520000  | H                                                                                                                                                                  | -5.901652000 | -0.563147000 | 5.957413000  |
| H                                                                                                                                                                  | -0.225129000 | -4.507047000 | 5.993178000  | H                                                                                                                                                                  | -5.153601000 | 1.262100000  | 7.437428000  |
| H                                                                                                                                                                  | -1.472157000 | -2.386744000 | 6.091089000  | H                                                                                                                                                                  | -2.767808000 | 1.496113000  | 8.001479000  |
| C                                                                                                                                                                  | -0.560472000 | 0.057859000  | 6.800094000  | C                                                                                                                                                                  | -0.703950000 | -0.071353000 | 7.217876000  |
| H                                                                                                                                                                  | -0.146184000 | 0.733534000  | 7.545352000  | H                                                                                                                                                                  | -0.516783000 | -0.500479000 | 8.203296000  |
| H                                                                                                                                                                  | -0.498581000 | 0.546513000  | 5.826667000  | H                                                                                                                                                                  | -0.079109000 | -0.589237000 | 6.493490000  |
| H                                                                                                                                                                  | -1.613287000 | -0.110112000 | 7.017312000  | H                                                                                                                                                                  | -0.412672000 | 0.977002000  | 7.248650000  |
| <b><math>S_{ax}(\text{chloroform})</math></b><br><b>Energy (hartrees) = -533.240741</b><br><b>Lowest harmonic vibrational frequency (cm<sup>-1</sup>) = 145.97</b> |              |              |              | <b><math>S_{eq}(\text{chloroform})</math></b><br><b>Energy (hartrees) = -533.227818</b><br><b>Lowest harmonic vibrational frequency (cm<sup>-1</sup>) = 166.42</b> |              |              |              |
| F                                                                                                                                                                  | 0.320628000  | -0.912331000 | 1.770258000  | C                                                                                                                                                                  | -0.951026000 | 0.719747000  | -0.743920000 |
| F                                                                                                                                                                  | -1.275641000 | 1.146884000  | 0.678856000  | C                                                                                                                                                                  | -1.228511000 | -0.601092000 | -0.049450000 |
| F                                                                                                                                                                  | 1.648933000  | 1.202472000  | 0.432282000  | H                                                                                                                                                                  | -1.882957000 | -1.219234000 | -0.662268000 |
| C                                                                                                                                                                  | 0.232092000  | -1.489681000 | 0.479726000  | H                                                                                                                                                                  | -1.738138000 | -0.393685000 | 0.893219000  |
| H                                                                                                                                                                  | 0.271611000  | -2.569273000 | 0.627508000  | C                                                                                                                                                                  | 0.065100000  | -1.338733000 | 0.246599000  |
| C                                                                                                                                                                  | -1.094380000 | -1.086895000 | -0.134694000 | C                                                                                                                                                                  | 1.057562000  | -0.488385000 | 1.025584000  |
| H                                                                                                                                                                  | -1.914093000 | -1.348478000 | 0.533355000  | H                                                                                                                                                                  | 0.647616000  | -0.265119000 | 2.012479000  |
| H                                                                                                                                                                  | -1.235490000 | -1.675867000 | -1.044270000 | H                                                                                                                                                                  | 1.996745000  | -1.026593000 | 1.154535000  |
| C                                                                                                                                                                  | -1.170099000 | 0.382803000  | -0.506577000 | C                                                                                                                                                                  | 1.294169000  | 0.816012000  | 0.283354000  |
| H                                                                                                                                                                  | -2.087241000 | 0.580992000  | -1.063194000 | C                                                                                                                                                                  | 0.004337000  | 1.583454000  | 0.060293000  |
| C                                                                                                                                                                  | 0.035553000  | 0.861616000  | -1.296315000 | H                                                                                                                                                                  | 0.197362000  | 2.520219000  | -0.462951000 |
| H                                                                                                                                                                  | -0.042904000 | 0.437156000  | -2.300360000 | H                                                                                                                                                                  | -0.452514000 | 1.812780000  | 1.025701000  |
| H                                                                                                                                                                  | 0.007905000  | 1.946411000  | -1.402325000 | F                                                                                                                                                                  | -0.250321000 | -2.485900000 | 0.997839000  |
| C                                                                                                                                                                  | 1.374501000  | 0.432601000  | -0.721145000 | F                                                                                                                                                                  | 2.187229000  | 1.617045000  | 1.015051000  |
| H                                                                                                                                                                  | 2.175592000  | 0.662033000  | -1.425524000 | F                                                                                                                                                                  | -2.164239000 | 1.404896000  | -0.894849000 |
| C                                                                                                                                                                  | 1.424796000  | -1.034346000 | -0.338757000 | H                                                                                                                                                                  | -0.559993000 | 0.557018000  | -1.753400000 |
| H                                                                                                                                                                  | 2.350316000  | -1.250524000 | 0.195600000  | H                                                                                                                                                                  | 0.524765000  | -1.697368000 | -0.679030000 |
| H                                                                                                                                                                  | 1.444550000  | -1.624756000 | -1.258697000 | H                                                                                                                                                                  | 1.778674000  | 0.615972000  | -0.676732000 |
| C                                                                                                                                                                  | -3.147211000 | 0.774850000  | 3.188468000  | C                                                                                                                                                                  | -0.561195000 | -1.230667000 | 4.764055000  |
| H                                                                                                                                                                  | -2.628641000 | 1.348147000  | 2.417900000  | H                                                                                                                                                                  | -1.063774000 | -1.255357000 | 5.732527000  |
| Cl                                                                                                                                                                 | -3.656636000 | -0.768336000 | 2.503986000  | Cl                                                                                                                                                                 | -0.208230000 | -2.882935000 | 4.259767000  |
| Cl                                                                                                                                                                 | -2.051597000 | 0.506092000  | 4.550018000  | Cl                                                                                                                                                                 | -1.631610000 | -0.458036000 | 3.600536000  |
| Cl                                                                                                                                                                 | -4.575506000 | 1.675996000  | 3.718335000  | Cl                                                                                                                                                                 | 0.940292000  | -0.297278000 | 4.917904000  |
| C                                                                                                                                                                  | 0.385839000  | 3.280807000  | 2.223250000  | C                                                                                                                                                                  | 3.011484000  | -4.302866000 | 2.683319000  |
| H                                                                                                                                                                  | 0.336116000  | 2.203613000  | 2.064080000  | H                                                                                                                                                                  | 4.024711000  | -4.708524000 | 2.700944000  |
| Cl                                                                                                                                                                 | -0.643746000 | 3.707842000  | 3.598430000  | Cl                                                                                                                                                                 | 1.989990000  | -5.310522000 | 3.717816000  |
| Cl                                                                                                                                                                 | 2.057108000  | 3.748124000  | 2.543388000  | Cl                                                                                                                                                                 | 3.051497000  | -2.647434000 | 3.296893000  |
| Cl                                                                                                                                                                 | -0.183623000 | 4.087779000  | 0.771143000  | Cl                                                                                                                                                                 | 2.414427000  | -4.331729000 | 1.026024000  |
| C                                                                                                                                                                  | -4.805319000 | 3.531741000  | 0.817575000  | C                                                                                                                                                                  | 0.336710000  | 3.888136000  | 3.510550000  |
| H                                                                                                                                                                  | -5.586070000 | 3.346622000  | 1.558084000  | H                                                                                                                                                                  | 0.191970000  | 4.704262000  | 4.220453000  |
| Cl                                                                                                                                                                 | -5.366277000 | 4.761693000  | -0.318188000 | Cl                                                                                                                                                                 | 0.482640000  | 4.570274000  | 1.885769000  |
| Cl                                                                                                                                                                 | -3.342445000 | 4.072502000  | 1.637787000  | Cl                                                                                                                                                                 | 1.807960000  | 2.999024000  | 3.941417000  |
| Cl                                                                                                                                                                 | -4.489457000 | 2.019497000  | -0.035404000 | Cl                                                                                                                                                                 | -1.058052000 | 2.818280000  | 3.605323000  |
| C                                                                                                                                                                  | 2.664650000  | 0.260118000  | 3.408045000  | C                                                                                                                                                                  | 2.954410000  | 3.440822000  | -1.716091000 |
| H                                                                                                                                                                  | 2.427368000  | 0.497907000  | 2.370943000  | H                                                                                                                                                                  | 3.168981000  | 2.853700000  | -0.821300000 |
| Cl                                                                                                                                                                 | 2.910526000  | -1.481448000 | 3.561675000  | Cl                                                                                                                                                                 | 2.100789000  | 2.423971000  | -2.882029000 |
| Cl                                                                                                                                                                 | 4.134732000  | 1.122556000  | 3.872640000  | Cl                                                                                                                                                                 | 1.933739000  | 4.811871000  | -1.273031000 |
| Cl                                                                                                                                                                 | 1.315293000  | 0.767104000  | 4.429439000  | Cl                                                                                                                                                                 | 4.479056000  | 3.997464000  | -2.419621000 |
| C                                                                                                                                                                  | -1.486733000 | 4.948850000  | -2.657808000 | C                                                                                                                                                                  | 4.049668000  | -1.112481000 | -2.179522000 |

|                                                                                                                                          |              |              |              |                                                                                                                                          |              |              |              |
|------------------------------------------------------------------------------------------------------------------------------------------|--------------|--------------|--------------|------------------------------------------------------------------------------------------------------------------------------------------|--------------|--------------|--------------|
| H                                                                                                                                        | -1.692149000 | 5.971902000  | -2.336729000 | H                                                                                                                                        | 4.619755000  | -1.618334000 | -2.961186000 |
| Cl                                                                                                                                       | -1.936121000 | 4.760601000  | -4.358925000 | Cl                                                                                                                                       | 2.378705000  | -0.968148000 | -2.725322000 |
| Cl                                                                                                                                       | 0.235948000  | 4.636121000  | -2.451320000 | Cl                                                                                                                                       | 4.109863000  | -2.068764000 | -0.700058000 |
| Cl                                                                                                                                       | -2.411062000 | 3.844085000  | -1.654804000 | Cl                                                                                                                                       | 4.736506000  | 0.491591000  | -1.903892000 |
| C                                                                                                                                        | 4.421624000  | 3.664940000  | -0.365578000 | C                                                                                                                                        | -0.000379000 | 1.139217000  | -6.292218000 |
| H                                                                                                                                        | 5.167873000  | 3.618342000  | -1.160888000 | H                                                                                                                                        | -0.230411000 | 0.300673000  | -6.952331000 |
| Cl                                                                                                                                       | 2.825263000  | 3.602211000  | -1.103918000 | Cl                                                                                                                                       | -1.416968000 | 2.186965000  | -6.166275000 |
| Cl                                                                                                                                       | 4.644414000  | 2.296748000  | 0.723128000  | Cl                                                                                                                                       | 0.426380000  | 0.500274000  | -4.708506000 |
| Cl                                                                                                                                       | 4.616719000  | 5.184289000  | 0.522636000  | Cl                                                                                                                                       | 1.372517000  | 2.035883000  | -6.956180000 |
| C                                                                                                                                        | 2.208142000  | 0.931212000  | -4.710784000 | C                                                                                                                                        | -2.054186000 | -1.963186000 | -4.180414000 |
| H                                                                                                                                        | 2.498925000  | 0.916402000  | -5.762422000 | H                                                                                                                                        | -2.794207000 | -2.728774000 | -3.935965000 |
| Cl                                                                                                                                       | 1.696262000  | -0.691016000 | -4.225455000 | Cl                                                                                                                                       | -2.745667000 | -0.364536000 | -3.917496000 |
| Cl                                                                                                                                       | 3.598358000  | 1.441048000  | -3.745377000 | Cl                                                                                                                                       | -0.652254000 | -2.187204000 | -3.132564000 |
| Cl                                                                                                                                       | 0.886495000  | 2.080816000  | -4.507147000 | Cl                                                                                                                                       | -1.570181000 | -2.154091000 | -5.870597000 |
| C                                                                                                                                        | -3.190715000 | -0.016489000 | -3.989846000 | C                                                                                                                                        | 0.385250000  | -5.150359000 | -1.663249000 |
| H                                                                                                                                        | -3.731376000 | -0.145461000 | -4.929296000 | H                                                                                                                                        | -0.188536000 | -4.589179000 | -0.922299000 |
| Cl                                                                                                                                       | -4.352018000 | -0.027923000 | -2.651669000 | Cl                                                                                                                                       | 0.930015000  | -6.666133000 | -0.941658000 |
| Cl                                                                                                                                       | -2.039853000 | -1.333956000 | -3.804471000 | Cl                                                                                                                                       | -0.634303000 | -5.485895000 | -3.061686000 |
| Cl                                                                                                                                       | -2.328728000 | 1.521449000  | -4.032291000 | Cl                                                                                                                                       | 1.774755000  | -4.180208000 | -2.154290000 |
| C                                                                                                                                        | -1.041174000 | -4.481223000 | -3.248386000 | C                                                                                                                                        | -3.816284000 | -5.051228000 | -1.489700000 |
| H                                                                                                                                        | -1.506696000 | -4.306286000 | -4.220393000 | H                                                                                                                                        | -4.819607000 | -4.967695000 | -1.066763000 |
| Cl                                                                                                                                       | 0.360684000  | -3.421570000 | -3.106114000 | Cl                                                                                                                                       | -3.012751000 | -6.471639000 | -0.816230000 |
| Cl                                                                                                                                       | -2.202815000 | -4.107045000 | -1.980903000 | Cl                                                                                                                                       | -3.945259000 | -5.196095000 | -3.250847000 |
| Cl                                                                                                                                       | -0.541763000 | -6.176538000 | -3.148147000 | Cl                                                                                                                                       | -2.917392000 | -3.597187000 | -1.071857000 |
| C                                                                                                                                        | -1.204024000 | -5.653074000 | 0.989191000  | C                                                                                                                                        | -3.359273000 | -3.236692000 | 2.568523000  |
| H                                                                                                                                        | -0.909944000 | -6.078034000 | 1.950379000  | H                                                                                                                                        | -2.287409000 | -3.270019000 | 2.355845000  |
| Cl                                                                                                                                       | 0.254082000  | -5.225857000 | 0.099004000  | Cl                                                                                                                                       | -4.047046000 | -1.828967000 | 1.772165000  |
| Cl                                                                                                                                       | -2.138065000 | -6.857765000 | 0.085120000  | Cl                                                                                                                                       | -4.117619000 | -4.705289000 | 1.949807000  |
| Cl                                                                                                                                       | -2.178332000 | -4.217860000 | 1.284987000  | Cl                                                                                                                                       | -3.612607000 | -3.124564000 | 4.312816000  |
| C                                                                                                                                        | -5.478216000 | -3.557993000 | 0.295871000  | C                                                                                                                                        | -6.006606000 | -1.463897000 | -1.714358000 |
| H                                                                                                                                        | -6.507141000 | -3.304023000 | 0.034102000  | H                                                                                                                                        | -6.908150000 | -0.873516000 | -1.888837000 |
| Cl                                                                                                                                       | -5.069224000 | -5.109912000 | -0.428325000 | Cl                                                                                                                                       | -6.371664000 | -2.696400000 | -0.501077000 |
| Cl                                                                                                                                       | -4.415600000 | -2.301142000 | -0.330202000 | Cl                                                                                                                                       | -5.529893000 | -2.235091000 | -3.230663000 |
| Cl                                                                                                                                       | -5.338780000 | -3.640745000 | 2.058711000  | Cl                                                                                                                                       | -4.723805000 | -0.399104000 | -1.138323000 |
| C                                                                                                                                        | -0.339076000 | -2.649718000 | 4.289130000  | C                                                                                                                                        | -1.076089000 | -6.658922000 | 2.799932000  |
| H                                                                                                                                        | -0.266591000 | -1.717218000 | 3.726798000  | H                                                                                                                                        | -0.138751000 | -7.192358000 | 2.967433000  |
| Cl                                                                                                                                       | 0.401820000  | -2.424344000 | 5.878810000  | Cl                                                                                                                                       | -0.786412000 | -5.364759000 | 1.644756000  |
| Cl                                                                                                                                       | -2.039372000 | -3.090166000 | 4.468170000  | Cl                                                                                                                                       | -2.276903000 | -7.790984000 | 2.164946000  |
| Cl                                                                                                                                       | 0.519134000  | -3.908415000 | 3.398020000  | Cl                                                                                                                                       | -1.627237000 | -5.978254000 | 4.335731000  |
| C                                                                                                                                        | 1.657915000  | 6.836427000  | -0.097292000 | C                                                                                                                                        | 1.862060000  | -2.831153000 | -5.598874000 |
| H                                                                                                                                        | 1.670976000  | 5.789086000  | 0.213053000  | H                                                                                                                                        | 1.353019000  | -2.306064000 | -4.788377000 |
| Cl                                                                                                                                       | -0.019707000 | 7.313718000  | -0.363195000 | Cl                                                                                                                                       | 1.759716000  | -1.847994000 | -7.061989000 |
| Cl                                                                                                                                       | 2.381122000  | 7.830291000  | 1.173837000  | Cl                                                                                                                                       | 3.550667000  | -3.059336000 | -5.143623000 |
| Cl                                                                                                                                       | 2.571637000  | 6.998174000  | -1.597077000 | Cl                                                                                                                                       | 1.085955000  | -4.396054000 | -5.852447000 |
| C                                                                                                                                        | -6.938318000 | -0.096982000 | 1.000713000  | C                                                                                                                                        | -2.669552000 | 3.787266000  | -2.868592000 |
| H                                                                                                                                        | -5.898591000 | -0.193726000 | 1.325029000  | H                                                                                                                                        | -2.912485000 | 3.933717000  | -1.814427000 |
| Cl                                                                                                                                       | -7.547672000 | 1.488856000  | 1.482538000  | Cl                                                                                                                                       | -0.997739000 | 3.261738000  | -2.978968000 |
| Cl                                                                                                                                       | -7.007407000 | -0.259991000 | -0.755580000 | Cl                                                                                                                                       | -3.748888000 | 2.565317000  | -3.537899000 |
| Cl                                                                                                                                       | -7.900856000 | -1.367680000 | 1.769357000  | Cl                                                                                                                                       | -2.869073000 | 5.314981000  | -3.738954000 |
| C                                                                                                                                        | -4.877401000 | -4.555197000 | -4.541240000 | C                                                                                                                                        | -4.071428000 | 3.009686000  | 1.261855000  |
| H                                                                                                                                        | -5.811703000 | -4.746768000 | -5.071787000 | H                                                                                                                                        | -4.632493000 | 3.530703000  | 2.039941000  |
| Cl                                                                                                                                       | -4.424214000 | -6.003617000 | -3.628145000 | Cl                                                                                                                                       | -2.640224000 | 3.947663000  | 0.865861000  |
| Cl                                                                                                                                       | -3.629216000 | -4.175238000 | -5.732330000 | Cl                                                                                                                                       | -3.604267000 | 1.425836000  | 1.873701000  |
| Cl                                                                                                                                       | -5.106410000 | -3.178327000 | -3.458733000 | Cl                                                                                                                                       | -5.104028000 | 2.833118000  | -0.166664000 |
| C                                                                                                                                        | -5.463044000 | 3.141234000  | -3.447359000 | C                                                                                                                                        | -6.873487000 | 0.260569000  | 1.743323000  |
| H                                                                                                                                        | -4.565039000 | 2.870165000  | -2.887730000 | H                                                                                                                                        | -5.856155000 | 0.142405000  | 1.362922000  |
| Cl                                                                                                                                       | -6.883766000 | 2.636418000  | -2.530551000 | Cl                                                                                                                                       | -6.946565000 | 1.725089000  | 2.725507000  |
| Cl                                                                                                                                       | -5.471222000 | 4.891509000  | -3.695006000 | Cl                                                                                                                                       | -7.977805000 | 0.412827000  | 0.371989000  |
| Cl                                                                                                                                       | -5.432423000 | 2.315122000  | -5.008199000 | Cl                                                                                                                                       | -7.291085000 | -1.151714000 | 2.714364000  |
| C                                                                                                                                        | -1.168737000 | -1.324757000 | -7.325873000 | C                                                                                                                                        | -4.292290000 | 1.400470000  | 5.716725000  |
| H                                                                                                                                        | -0.840135000 | -1.383409000 | -8.365046000 | H                                                                                                                                        | -4.990361000 | 1.473316000  | 6.552635000  |
| Cl                                                                                                                                       | -0.519273000 | -2.711114000 | -6.444885000 | Cl                                                                                                                                       | -2.661718000 | 1.172332000  | 6.362473000  |
| Cl                                                                                                                                       | -0.573013000 | 0.178757000  | -6.619864000 | Cl                                                                                                                                       | -4.750536000 | 0.031019000  | 4.707399000  |
| Cl                                                                                                                                       | -2.936519000 | -1.343947000 | -7.292373000 | Cl                                                                                                                                       | -4.361938000 | 2.904075000  | 4.795119000  |
| C                                                                                                                                        | 3.086858000  | 4.830504000  | -4.502029000 | C                                                                                                                                        | 0.940926000  | 5.013111000  | -5.200473000 |
| H                                                                                                                                        | 2.441023000  | 4.233113000  | -3.855304000 | H                                                                                                                                        | 0.558642000  | 4.057194000  | -4.836564000 |
| Cl                                                                                                                                       | 2.292060000  | 6.368560000  | -4.846864000 | Cl                                                                                                                                       | 2.700371000  | 4.909527000  | -5.324969000 |
| Cl                                                                                                                                       | 4.618127000  | 5.099795000  | -3.667491000 | Cl                                                                                                                                       | 0.237906000  | 5.351899000  | -6.786663000 |
| Cl                                                                                                                                       | 3.366297000  | 3.945303000  | -6.003536000 | Cl                                                                                                                                       | 0.491941000  | 6.273679000  | -4.048872000 |
| C                                                                                                                                        | 3.764715000  | -4.368241000 | -1.481198000 | C                                                                                                                                        | 4.550257000  | 1.866549000  | -5.459421000 |
| H                                                                                                                                        | 4.807954000  | -4.688635000 | -1.500892000 | H                                                                                                                                        | 3.881628000  | 2.533463000  | -4.910541000 |
| Cl                                                                                                                                       | 2.745932000  | -5.692166000 | -2.057515000 | Cl                                                                                                                                       | 6.144842000  | 1.896135000  | -4.697395000 |
| Cl                                                                                                                                       | 3.331417000  | -3.943182000 | 0.180284000  | Cl                                                                                                                                       | 3.888873000  | 0.236416000  | -5.403638000 |
| Cl                                                                                                                                       | 3.589498000  | -2.967336000 | -2.538636000 | Cl                                                                                                                                       | 4.661622000  | 2.420491000  | -7.133863000 |
| C                                                                                                                                        | 5.986994000  | -0.863142000 | -0.215879000 | C                                                                                                                                        | -2.102022000 | 7.148969000  | -0.226830000 |
| H                                                                                                                                        | 6.827416000  | -0.218173000 | 0.046488000  | H                                                                                                                                        | -1.906766000 | 8.152713000  | -0.608063000 |
| Cl                                                                                                                                       | 5.101725000  | -0.127612000 | -1.551465000 | Cl                                                                                                                                       | -0.910878000 | 6.041592000  | -0.909826000 |
| Cl                                                                                                                                       | 6.615085000  | -2.441304000 | -0.706032000 | Cl                                                                                                                                       | -1.967878000 | 7.173814000  | 1.534244000  |
| Cl                                                                                                                                       | 4.939883000  | -1.036332000 | 1.194630000  | Cl                                                                                                                                       | -3.736757000 | 6.671664000  | -0.705532000 |
| $S_{\text{ax} \text{acetone}}$<br>Energy (hartrees) = -533.241194<br>Lowest harmonic vibrational frequency ( $\text{cm}^{-1}$ ) = 136.43 |              |              |              | $S_{\text{eq} \text{acetone}}$<br>Energy (hartrees) = -533.235513<br>Lowest harmonic vibrational frequency ( $\text{cm}^{-1}$ ) = 151.56 |              |              |              |
| F                                                                                                                                        | 0.013293000  | -0.657746000 | 1.591807000  | C                                                                                                                                        | -1.113632000 | 1.431197000  | 0.458412000  |
| F                                                                                                                                        | -1.529093000 | 1.080961000  | -0.090228000 | C                                                                                                                                        | -1.576256000 | -0.003657000 | 0.271545000  |
| F                                                                                                                                        | 1.384075000  | 1.327783000  | 0.020972000  | H                                                                                                                                        | -2.510917000 | -0.037909000 | -0.287754000 |

|   |              |              |              |   |              |              |              |
|---|--------------|--------------|--------------|---|--------------|--------------|--------------|
| C | 0.120334000  | -1.430271000 | 0.411002000  | H | -1.751628000 | -0.458457000 | 1.250025000  |
| H | 0.193689000  | -2.466381000 | 0.747707000  | C | -0.502769000 | -0.794128000 | -0.459672000 |
| C | -1.130913000 | -1.247100000 | -0.428054000 | C | 0.836338000  | -0.740618000 | 0.258970000  |
| H | -2.029658000 | -1.462218000 | 0.153055000  | H | 0.710919000  | -1.163835000 | 1.259282000  |
| H | -1.097694000 | -1.997877000 | -1.222988000 | C | 1.596111000  | -1.311077000 | -0.279018000 |
| C | -1.231559000 | 0.118119000  | -1.086943000 | H | 1.270188000  | 0.705610000  | 0.414192000  |
| H | -2.071156000 | 0.133404000  | -1.782787000 | C | 0.229382000  | 1.517087000  | 1.164214000  |
| C | 0.042806000  | 0.538880000  | -1.799184000 | H | 0.544765000  | 2.556767000  | 1.245284000  |
| H | 0.137407000  | -0.064602000 | -2.705912000 | H | 0.130545000  | 1.088421000  | 2.164587000  |
| H | -0.029846000 | 1.577726000  | -2.126348000 | F | -0.906336000 | -2.137302000 | -0.543722000 |
| C | 1.309144000  | 0.337347000  | -0.985773000 | F | 2.475852000  | 0.747768000  | 1.139959000  |
| H | 2.182635000  | 0.496063000  | -1.620941000 | F | -2.059477000 | 2.120736000  | 1.246085000  |
| C | 1.381492000  | -1.035619000 | -0.336855000 | H | -1.077663000 | 1.943609000  | -0.506998000 |
| H | 2.254851000  | -1.101568000 | 0.313215000  | H | -0.403661000 | -0.431530000 | -1.488325000 |
| H | 1.520750000  | -1.765143000 | -1.142919000 | H | 1.488355000  | 1.154660000  | -0.558830000 |
| C | 0.959251000  | 5.028396000  | -0.763271000 | C | 1.208058000  | 3.622503000  | -2.558284000 |
| H | 0.745508000  | 6.050297000  | -0.460390000 | H | 2.139157000  | 3.335320000  | -2.064985000 |
| H | 1.183457000  | 4.453861000  | 0.136319000  | H | 1.457657000  | 4.357844000  | -3.318462000 |
| H | 1.824741000  | 5.008529000  | -1.419818000 | H | 0.535944000  | 4.054583000  | -1.820638000 |
| C | -0.231852000 | 4.427276000  | -1.441944000 | C | 0.623799000  | 2.399819000  | -3.186430000 |
| C | -1.521782000 | 4.481759000  | -0.674634000 | C | 1.386839000  | 1.859917000  | -4.361320000 |
| H | -2.360266000 | 4.603956000  | -1.355919000 | H | 1.111011000  | 0.825126000  | -4.552621000 |
| H | -1.647385000 | 3.523045000  | -0.171747000 | H | 1.140839000  | 2.456483000  | -5.238210000 |
| H | -1.517106000 | 5.271393000  | 0.068224000  | H | 2.455036000  | 1.941955000  | -4.185362000 |
| O | -0.163869000 | 3.902560000  | -2.535823000 | O | -0.396074000 | 1.873103000  | -2.780249000 |
| C | -1.049640000 | 1.347591000  | -5.697204000 | C | 3.429447000  | 3.881199000  | 0.932518000  |
| H | -1.070540000 | 0.592283000  | -6.478784000 | H | 3.161167000  | 3.380695000  | 1.861214000  |
| H | -1.232109000 | 2.332779000  | -6.112154000 | H | 4.026583000  | 4.754252000  | 1.185054000  |
| H | -0.053589000 | 1.334910000  | -5.250369000 | H | 2.525517000  | 4.193194000  | 0.415186000  |
| C | -2.032517000 | 1.013533000  | -4.616169000 | C | 4.240819000  | 2.952488000  | 0.080170000  |
| C | -2.657668000 | 2.186628000  | -3.928462000 | C | 5.512069000  | 2.451301000  | 0.695171000  |
| H | -3.265104000 | 1.863060000  | -3.086108000 | H | 6.290554000  | 2.365011000  | -0.059128000 |
| H | -1.874219000 | 2.863485000  | -3.590544000 | H | 5.841080000  | 3.084097000  | 1.511999000  |
| H | -3.284181000 | 2.720380000  | -4.640538000 | H | 5.326398000  | 1.448204000  | 1.081464000  |
| O | -2.285115000 | -0.134930000 | -4.306675000 | O | 3.893415000  | 2.627928000  | -1.038516000 |
| C | -0.680759000 | -2.956966000 | -4.296078000 | C | 0.157653000  | 1.941531000  | 5.004955000  |
| H | -1.176698000 | -1.985393000 | -4.351888000 | H | 0.238784000  | 0.911059000  | 4.650046000  |
| H | -0.887422000 | -3.484898000 | -5.222766000 | H | -0.188885000 | 1.919714000  | 6.033599000  |
| H | -1.091198000 | -3.511430000 | -3.454678000 | H | -0.557630000 | 2.457950000  | 4.370095000  |
| C | 0.786711000  | -2.732085000 | -4.131082000 | C | 1.515088000  | 2.566753000  | 4.901903000  |
| C | 1.511910000  | -2.211856000 | -5.336094000 | C | 2.423780000  | 2.302310000  | 6.070138000  |
| H | 1.634855000  | -1.134767000 | -5.200192000 | H | 2.080374000  | 2.898002000  | 6.914693000  |
| H | 2.505577000  | -2.649107000 | -5.401101000 | H | 2.374748000  | 1.255348000  | 6.355155000  |
| H | 0.958829000  | -2.388056000 | -6.251578000 | H | 3.446641000  | 2.583008000  | 5.834470000  |
| O | 1.363804000  | -2.922598000 | -3.074520000 | O | 1.860401000  | 3.234558000  | 3.949132000  |
| C | -0.218528000 | 3.007426000  | 2.588066000  | C | -1.851004000 | -1.915450000 | 4.521380000  |
| H | -0.550658000 | 2.234498000  | 1.897009000  | H | -2.583345000 | -1.724168000 | 3.733825000  |
| H | -0.691278000 | 2.827965000  | 3.548129000  | H | -2.139241000 | -2.824853000 | 5.037474000  |
| H | -0.511742000 | 3.975816000  | 2.195049000  | H | -1.869076000 | -1.065653000 | 5.199288000  |
| C | 1.270534000  | 2.902535000  | 2.702613000  | C | -0.507281000 | -2.051692000 | 3.873679000  |
| C | 1.751323000  | 1.768879000  | 3.561174000  | C | -0.115140000 | -3.443155000 | 3.487741000  |
| H | 2.834127000  | 1.782896000  | 3.652813000  | H | 0.848101000  | -3.448405000 | 2.984266000  |
| H | 1.296195000  | 1.839164000  | 4.546001000  | H | -0.068759000 | -4.069110000 | 4.376110000  |
| H | 1.424823000  | 0.832573000  | 3.111983000  | H | -0.870526000 | -3.869299000 | 2.827993000  |
| O | 2.027624000  | 3.664018000  | 2.136956000  | O | 0.211172000  | -1.091826000 | 3.661450000  |
| C | 2.846488000  | 2.945229000  | -3.689769000 | C | -5.423715000 | -0.091060000 | 0.485993000  |
| H | 3.394447000  | 2.891180000  | -2.749687000 | H | -6.496732000 | -0.245890000 | 0.587251000  |
| H | 3.305253000  | 3.718151000  | -4.300697000 | H | -5.272427000 | 0.873458000  | 0.005712000  |
| H | 1.806814000  | 3.193318000  | -3.490304000 | H | -5.009749000 | -0.885376000 | -0.131412000 |
| C | 2.967000000  | 1.610213000  | -4.355578000 | C | -4.805436000 | -0.081489000 | 1.848579000  |
| C | 4.369570000  | 1.211389000  | -4.711226000 | C | -5.058766000 | 1.165258000  | 2.646277000  |
| H | 4.385968000  | 0.240026000  | -5.197300000 | H | -4.895479000 | 0.990543000  | 3.706388000  |
| H | 4.816131000  | 1.958052000  | -5.362692000 | H | -4.344136000 | 1.911040000  | 2.299790000  |
| H | 4.951969000  | 1.175682000  | -3.792760000 | H | -6.059368000 | 1.545849000  | 2.467216000  |
| O | 2.011167000  | 0.890030000  | -4.563241000 | O | -4.133723000 | -0.998074000 | 2.278244000  |
| C | 4.764499000  | 3.397430000  | 0.282921000  | C | -3.012789000 | -4.702436000 | -0.764836000 |
| H | 3.868256000  | 3.623896000  | 0.860250000  | H | -3.773564000 | -5.402908000 | -1.102841000 |
| H | 5.622978000  | 3.554513000  | 0.931247000  | H | -3.279785000 | -3.713653000 | -1.136883000 |
| H | 4.827883000  | 4.062504000  | -0.574310000 | H | -2.042698000 | -4.992842000 | -1.160249000 |
| C | 4.704172000  | 1.964109000  | -0.150684000 | C | -2.991502000 | -4.662308000 | 0.730671000  |
| C | 4.595897000  | 0.971980000  | 0.968576000  | C | -4.247014000 | -4.160696000 | 1.376582000  |
| H | 4.743935000  | -0.044093000 | 0.609744000  | H | -4.135838000 | -3.083911000 | 1.521947000  |
| H | 5.303958000  | 1.201051000  | 1.759325000  | H | -5.114722000 | -4.330417000 | 0.748299000  |
| H | 3.590456000  | 1.059680000  | 1.377751000  | H | -4.383685000 | -4.613608000 | 2.355551000  |
| O | 4.710086000  | 1.631421000  | -1.319250000 | O | -2.020163000 | -4.997133000 | 1.380414000  |
| C | 4.128240000  | -4.082406000 | -1.537946000 | C | -3.337601000 | 0.207714000  | -3.163183000 |
| H | 3.142290000  | -4.117516000 | -1.999703000 | H | -2.321242000 | 0.587369000  | -3.069494000 |
| H | 4.855514000  | -4.401547000 | -2.279205000 | H | -3.679008000 | 0.410041000  | -4.175079000 |
| H | 4.153159000  | -4.749283000 | -0.680552000 | H | -3.975965000 | 0.716947000  | -2.445375000 |
| C | 4.383314000  | -2.662022000 | -1.126566000 | C | -3.330922000 | -1.272695000 | -2.928844000 |
| C | 4.481546000  | -1.692306000 | -2.265479000 | C | -2.605550000 | -2.067967000 | -3.973870000 |
| H | 4.615531000  | -0.674311000 | -1.908120000 | H | -2.620826000 | -3.127959000 | -3.735193000 |
| H | 5.311054000  | -1.963329000 | -2.913812000 | H | -3.077398000 | -1.900378000 | -4.939690000 |
| H | 3.564100000  | -1.755496000 | -2.848167000 | H | -1.575855000 | -1.722013000 | -4.045655000 |
| O | 4.463441000  | -2.324831000 | 0.037358000  | O | -3.871561000 | -1.788750000 | -1.972388000 |
| C | -2.173316000 | 0.355166000  | 4.174466000  | C | 1.188623000  | -3.247911000 | -3.061042000 |

|                                                                        |              |              |              |                                                                         |              |              |              |
|------------------------------------------------------------------------|--------------|--------------|--------------|-------------------------------------------------------------------------|--------------|--------------|--------------|
| H                                                                      | -1.569438000 | 0.072714000  | 3.313316000  | H                                                                       | 1.254696000  | -4.310736000 | -3.272792000 |
| H                                                                      | -2.865923000 | -0.456053000 | 4.374523000  | H                                                                       | 2.011538000  | -2.999917000 | -2.388938000 |
| H                                                                      | -2.721086000 | 1.263051000  | 3.933821000  | H                                                                       | 0.253748000  | -3.023985000 | -2.554669000 |
| C                                                                      | -1.247291000 | 0.574068000  | 5.333782000  | C                                                                       | 1.348443000  | -2.428855000 | -4.299946000 |
| C                                                                      | -0.635819000 | -0.668251000 | 5.908441000  | C                                                                       | 2.425812000  | -2.889987000 | -5.235606000 |
| H                                                                      | -0.017348000 | -0.428111000 | 6.769565000  | H                                                                       | 2.600847000  | -2.157953000 | -6.019793000 |
| H                                                                      | -1.414213000 | -1.368930000 | 6.197880000  | H                                                                       | 3.343885000  | -3.075490000 | -4.681101000 |
| H                                                                      | -0.022212000 | -1.145780000 | 5.145077000  | H                                                                       | 2.114018000  | -3.829693000 | -5.687591000 |
| O                                                                      | -0.986400000 | 1.683283000  | 5.757054000  | O                                                                       | 0.666476000  | -1.446573000 | -4.527789000 |
| C                                                                      | 3.676505000  | -1.870129000 | 3.474160000  | C                                                                       | 3.707404000  | -0.291839000 | -2.490201000 |
| H                                                                      | 4.360544000  | -2.430055000 | 4.109050000  | H                                                                       | 3.815894000  | 0.699231000  | -2.048075000 |
| H                                                                      | 4.163077000  | -1.719010000 | 2.514093000  | H                                                                       | 4.292337000  | -0.318456000 | -3.406038000 |
| H                                                                      | 3.455766000  | -0.915794000 | 3.944142000  | H                                                                       | 2.659128000  | -0.476673000 | -2.710847000 |
| C                                                                      | 2.421722000  | -2.672631000 | 3.284371000  | C                                                                       | 4.251801000  | -1.296047000 | -1.523187000 |
| C                                                                      | 2.591682000  | -3.891757000 | 2.425845000  | C                                                                       | 5.724549000  | -1.206746000 | -1.268692000 |
| H                                                                      | 1.649919000  | -4.419463000 | 2.301055000  | H                                                                       | 5.916501000  | -1.264990000 | -0.198473000 |
| H                                                                      | 2.983089000  | -3.588469000 | 1.456840000  | H                                                                       | 6.195996000  | -2.064166000 | -1.747359000 |
| H                                                                      | 3.321737000  | -4.556170000 | 2.882339000  | H                                                                       | 6.142200000  | -0.292710000 | -1.675494000 |
| O                                                                      | 1.362690000  | -2.365246000 | 3.789358000  | O                                                                       | 3.549297000  | -2.129757000 | -0.982239000 |
| C                                                                      | -1.838989000 | -3.309027000 | 3.106551000  | C                                                                       | 0.190281000  | -7.166261000 | 0.189161000  |
| H                                                                      | -2.548165000 | -3.160084000 | 3.913876000  | H                                                                       | 0.821955000  | -7.607727000 | 0.957438000  |
| H                                                                      | -1.119634000 | -2.490450000 | 3.130335000  | H                                                                       | -0.632218000 | -6.656774000 | 0.687548000  |
| H                                                                      | -2.352095000 | -3.292369000 | 2.147809000  | H                                                                       | -0.184694000 | -7.952866000 | -0.460637000 |
| C                                                                      | -1.061324000 | -4.574669000 | 3.293800000  | C                                                                       | 0.990611000  | -6.163242000 | -0.590009000 |
| C                                                                      | -0.684132000 | -4.882789000 | 4.715438000  | C                                                                       | 1.331485000  | -4.919152000 | 0.173781000  |
| H                                                                      | -0.142172000 | -5.823116000 | 4.775486000  | H                                                                       | 2.087683000  | -4.329241000 | -0.335859000 |
| H                                                                      | -0.051904000 | -4.072459000 | 5.074423000  | H                                                                       | 0.422362000  | -4.324233000 | 0.258672000  |
| H                                                                      | -1.571356000 | -4.927346000 | 5.341254000  | H                                                                       | 1.655945000  | -5.170195000 | 1.178754000  |
| O                                                                      | -0.712990000 | -5.276017000 | 2.365837000  | O                                                                       | 1.318796000  | -6.342186000 | -1.745187000 |
| C                                                                      | -5.138633000 | -4.577529000 | -0.707046000 | C                                                                       | -3.190103000 | 3.768210000  | -2.690631000 |
| H                                                                      | -6.172930000 | -4.420939000 | -1.005190000 | H                                                                       | -2.950014000 | 4.802786000  | -2.913164000 |
| H                                                                      | -4.645109000 | -5.160982000 | -1.480696000 | H                                                                       | -2.260874000 | 3.198190000  | -2.658598000 |
| H                                                                      | -5.108463000 | -5.109376000 | 0.240391000  | H                                                                       | -3.817787000 | 3.340640000  | -3.467723000 |
| C                                                                      | -4.437913000 | -3.252326000 | -0.598277000 | C                                                                       | -3.849766000 | 3.636099000  | -1.347744000 |
| C                                                                      | -4.331244000 | -2.490849000 | -1.883795000 | C                                                                       | -3.424475000 | 4.657707000  | -0.334239000 |
| H                                                                      | -4.250504000 | -1.420730000 | -1.707131000 | H                                                                       | -3.816301000 | 4.408915000  | 0.648080000  |
| H                                                                      | -3.417467000 | -2.822184000 | -2.375597000 | H                                                                       | -2.337900000 | 4.708819000  | -0.299843000 |
| H                                                                      | -5.166286000 | -2.707498000 | -2.540994000 | H                                                                       | -3.796913000 | 5.634936000  | -0.635601000 |
| O                                                                      | -3.976898000 | -2.845273000 | 0.447963000  | O                                                                       | -4.654996000 | 2.763518000  | -1.101323000 |
| C                                                                      | -4.458217000 | 0.444974000  | 1.125899000  | C                                                                       | 4.243810000  | 0.016743000  | 3.870288000  |
| H                                                                      | -3.500775000 | 0.709241000  | 1.571491000  | H                                                                       | 3.424883000  | 0.669381000  | 3.571069000  |
| H                                                                      | -5.231226000 | 0.658989000  | 1.857645000  | H                                                                       | 3.917575000  | -0.571965000 | 4.722332000  |
| H                                                                      | -4.445268000 | -0.612838000 | 0.875949000  | H                                                                       | 5.105788000  | 0.624854000  | 4.130667000  |
| C                                                                      | -4.633262000 | 1.302632000  | -0.088476000 | C                                                                       | 4.550183000  | -0.873610000 | 2.700138000  |
| C                                                                      | -4.977059000 | 2.733787000  | 0.208809000  | C                                                                       | 3.578740000  | -1.998436000 | 2.495653000  |
| H                                                                      | -4.762794000 | 3.369054000  | -0.646290000 | H                                                                       | 3.914239000  | -2.853028000 | 3.082084000  |
| H                                                                      | -6.043645000 | 2.789551000  | 0.422867000  | H                                                                       | 2.590288000  | -1.704425000 | 2.835503000  |
| H                                                                      | -4.441830000 | 3.075034000  | 1.090592000  | H                                                                       | 3.549319000  | -2.287170000 | 1.447536000  |
| O                                                                      | -4.508507000 | 0.883390000  | -1.221554000 | O                                                                       | 5.509264000  | -0.691742000 | 1.981213000  |
| C                                                                      | -1.788121000 | -6.780420000 | -0.420050000 | C                                                                       | 0.937041000  | 6.945304000  | 1.408957000  |
| H                                                                      | -1.186599000 | -7.645108000 | -0.688599000 | H                                                                       | 0.283659000  | 7.764159000  | 1.705436000  |
| H                                                                      | -1.673618000 | -6.613857000 | 0.649501000  | H                                                                       | 1.655872000  | 6.781915000  | 2.207013000  |
| H                                                                      | -2.831190000 | -6.970040000 | -0.656887000 | H                                                                       | 1.447535000  | 7.217806000  | 0.488889000  |
| C                                                                      | -1.283821000 | -5.559609000 | -1.133936000 | C                                                                       | 0.100358000  | 5.711860000  | 1.208689000  |
| C                                                                      | 0.148527000  | -5.224959000 | -0.839900000 | C                                                                       | -0.419238000 | 5.089700000  | 2.468223000  |
| H                                                                      | 0.484244000  | -4.371435000 | -1.423686000 | H                                                                       | -1.214111000 | 4.381631000  | 2.247260000  |
| H                                                                      | 0.221553000  | -5.000128000 | 0.222439000  | H                                                                       | 0.405576000  | 4.551337000  | 2.940136000  |
| H                                                                      | 0.782517000  | -6.084591000 | -1.039144000 | H                                                                       | -0.765965000 | 5.848535000  | 3.163284000  |
| O                                                                      | -1.982419000 | -4.888661000 | -1.863983000 | O                                                                       | -0.126913000 | 5.251308000  | 0.109334000  |
| C                                                                      | -6.435735000 | 1.153748000  | -3.982294000 | C                                                                       | -1.087081000 | -0.560034000 | -7.224145000 |
| H                                                                      | -7.334564000 | 0.569116000  | -3.800572000 | H                                                                       | -0.481720000 | -0.034972000 | -7.957842000 |
| H                                                                      | -5.744716000 | 0.968075000  | -3.161531000 | H                                                                       | -0.462692000 | -0.762046000 | -6.353700000 |
| H                                                                      | -6.691226000 | 2.209605000  | -4.017602000 | H                                                                       | -1.436348000 | -1.502526000 | -7.637567000 |
| C                                                                      | -5.802132000 | 0.720858000  | -5.274897000 | C                                                                       | -2.246444000 | 0.288981000  | -6.791033000 |
| C                                                                      | -5.364918000 | -0.716183000 | -5.308382000 | C                                                                       | -1.877946000 | 1.666905000  | -6.311419000 |
| H                                                                      | -5.202808000 | -1.044422000 | -6.331673000 | H                                                                       | -2.765265000 | 2.286190000  | -6.210892000 |
| H                                                                      | -4.420034000 | -0.784802000 | -4.768238000 | H                                                                       | -1.405380000 | 1.569534000  | -5.335442000 |
| H                                                                      | -6.086733000 | -1.356539000 | -4.812123000 | H                                                                       | -1.171086000 | 2.135058000  | -6.989721000 |
| O                                                                      | -5.637188000 | 1.477260000  | -6.208083000 | O                                                                       | -3.390520000 | -0.112966000 | -6.790514000 |
| C                                                                      | -3.533270000 | 3.741880000  | 5.705677000  | C                                                                       | 5.111386000  | -5.026879000 | -1.274852000 |
| H                                                                      | -2.607380000 | 3.215900000  | 5.949160000  | H                                                                       | 4.769540000  | -4.144248000 | -0.736999000 |
| H                                                                      | -3.632787000 | 4.590788000  | 6.373911000  | H                                                                       | 4.641816000  | -5.917034000 | -0.870988000 |
| H                                                                      | -4.356745000 | 3.045538000  | 5.843300000  | H                                                                       | 6.190624000  | -5.093409000 | -1.145708000 |
| C                                                                      | -3.434398000 | 4.169359000  | 4.270813000  | C                                                                       | 4.798981000  | -4.854587000 | -2.736508000 |
| C                                                                      | -2.816567000 | 5.523693000  | 4.054882000  | C                                                                       | 4.144430000  | -6.032379000 | -3.391345000 |
| H                                                                      | -2.660066000 | 5.708511000  | 2.995629000  | H                                                                       | 4.053016000  | -5.883392000 | -4.463902000 |
| H                                                                      | -3.480214000 | 6.286608000  | 4.457305000  | H                                                                       | 4.713869000  | -6.935613000 | -3.186443000 |
| H                                                                      | -1.871092000 | 5.583490000  | 4.588554000  | H                                                                       | 3.153408000  | -6.160688000 | -2.953825000 |
| O                                                                      | -3.800307000 | 3.466069000  | 3.354237000  | O                                                                       | 5.053725000  | -3.828437000 | -3.333442000 |
| <b><math>\epsilon_{ax}</math></b>                                      |              |              |              | <b><math>\epsilon_{eq}</math></b>                                       |              |              |              |
| <b>Energy (hartrees) = -572.536184</b>                                 |              |              |              | <b>Energy (hartrees) = -572.532488</b>                                  |              |              |              |
| <b>Lowest harmonic vibrational frequency (cm<sup>-1</sup>) = 92.09</b> |              |              |              | <b>Lowest harmonic vibrational frequency (cm<sup>-1</sup>) = 107.36</b> |              |              |              |
| C                                                                      | -1.010691000 | -1.268369000 | -0.755721000 | C                                                                       | 0.460215000  | 1.235122000  | -0.581569000 |
| C                                                                      | 0.442037000  | -1.274212000 | -0.300194000 | C                                                                       | -0.904809000 | 1.262587000  | 0.091576000  |
| C                                                                      | 1.201668000  | 0.000000000  | -0.675713000 | C                                                                       | -1.681555000 | -0.000015000 | -0.250705000 |

|                                                                                                                                                            |              |              |              |                                                                                                                                                           |              |              |              |
|------------------------------------------------------------------------------------------------------------------------------------------------------------|--------------|--------------|--------------|-----------------------------------------------------------------------------------------------------------------------------------------------------------|--------------|--------------|--------------|
| C                                                                                                                                                          | 0.442037000  | 1.274212000  | -0.300195000 | C                                                                                                                                                         | -0.904787000 | -1.262591000 | 0.091625000  |
| C                                                                                                                                                          | -1.010691000 | 1.268369000  | -0.755720000 | C                                                                                                                                                         | 0.460217000  | -1.235121000 | -0.581557000 |
| C                                                                                                                                                          | -1.773601000 | 0.000000000  | -0.399337000 | C                                                                                                                                                         | 1.291764000  | 0.000003000  | -0.216392000 |
| H                                                                                                                                                          | 0.957677000  | -2.135677000 | -0.737916000 | H                                                                                                                                                         | -1.458110000 | 2.145260000  | -0.230393000 |
| H                                                                                                                                                          | -1.026507000 | -1.380957000 | -1.844577000 | H                                                                                                                                                         | 0.336188000  | 1.279369000  | -1.669525000 |
| H                                                                                                                                                          | 0.957676000  | 2.135676000  | -0.737920000 | H                                                                                                                                                         | -1.458084000 | -2.145283000 | -0.230297000 |
| H                                                                                                                                                          | -1.026509000 | 1.380958000  | -1.844576000 | H                                                                                                                                                         | 0.336161000  | -1.279358000 | -1.669511000 |
| H                                                                                                                                                          | -2.741550000 | 0.000000000  | -0.910080000 | H                                                                                                                                                         | 2.176158000  | -0.000001000 | -0.859599000 |
| H                                                                                                                                                          | 1.251096000  | -0.000010000 | -1.772469000 | H                                                                                                                                                         | -1.955289000 | -0.000420000 | -1.311715000 |
| F                                                                                                                                                          | -2.059799000 | 0.000000000  | 0.969747000  | C                                                                                                                                                         | 1.766036000  | 0.000012000  | 1.238201000  |
| F                                                                                                                                                          | 0.488473000  | -1.463680000 | 1.085423000  | H                                                                                                                                                         | 2.370917000  | -0.885139000 | 1.429583000  |
| F                                                                                                                                                          | 0.488476000  | 1.463682000  | 1.085421000  | H                                                                                                                                                         | 2.371166000  | 0.885012000  | 1.429491000  |
| C                                                                                                                                                          | 2.623158000  | -0.000010000 | -0.117385000 | H                                                                                                                                                         | 0.940781000  | 0.000176000  | 1.950252000  |
| H                                                                                                                                                          | 3.170463000  | -0.884027000 | -0.450216000 | F                                                                                                                                                         | -2.886027000 | -0.000007000 | 0.462651000  |
| H                                                                                                                                                          | 3.170455000  | 0.884041000  | -0.450186000 | F                                                                                                                                                         | 1.164182000  | 2.392200000  | -0.227634000 |
| H                                                                                                                                                          | 2.600119000  | -0.000018000 | 0.970571000  | F                                                                                                                                                         | 1.164202000  | -2.392196000 | -0.227657000 |
| H                                                                                                                                                          | -1.525387000 | 2.131525000  | -0.331178000 | H                                                                                                                                                         | -0.781767000 | -1.322556000 | 1.174225000  |
| H                                                                                                                                                          | -1.525387000 | -2.131526000 | -0.331180000 | H                                                                                                                                                         | -0.781817000 | 1.322600000  | 1.174177000  |
| $\epsilon_{\text{ax}}(\text{trimer})$<br><b>Energy (hartrees) = -1719.508526</b><br><b>Lowest harmonic vibrational frequency (cm<sup>-1</sup>) = 17.99</b> |              |              |              | $\epsilon_{\text{eq}}(\text{trimer})$<br><b>Energy (hartrees) = -1719.508664</b><br><b>Lowest harmonic vibrational frequency (cm<sup>-1</sup>) = 8.53</b> |              |              |              |
| F                                                                                                                                                          | -5.851436000 | -1.944218000 | -0.000365000 | C                                                                                                                                                         | -2.508672000 | -2.407456000 | -0.664428000 |
| F                                                                                                                                                          | -5.760281000 | 0.635233000  | -1.477396000 | C                                                                                                                                                         | -3.747736000 | -1.650440000 | -1.153161000 |
| F                                                                                                                                                          | -5.760863000 | 0.633807000  | 1.476955000  | C                                                                                                                                                         | -1.794477000 | -1.711578000 | 0.483882000  |
| C                                                                                                                                                          | -4.045803000 | -1.018677000 | 1.266214000  | F                                                                                                                                                         | -1.606657000 | -2.558733000 | -1.730745000 |
| H                                                                                                                                                          | -2.962376000 | -1.113932000 | 1.365443000  | H                                                                                                                                                         | -2.790959000 | -3.423341000 | -0.368064000 |
| C                                                                                                                                                          | -4.459212000 | -1.750333000 | -0.000512000 | H                                                                                                                                                         | -4.268419000 | -2.297987000 | -1.864311000 |
| H                                                                                                                                                          | -4.018506000 | -2.751520000 | -0.000803000 | C                                                                                                                                                         | -4.671609000 | -1.464288000 | 0.056320000  |
| C                                                                                                                                                          | -4.046181000 | -1.018115000 | -1.267059000 | C                                                                                                                                                         | -3.410409000 | -0.336718000 | -1.862176000 |
| H                                                                                                                                                          | -2.962949000 | -1.114336000 | -1.367464000 | C                                                                                                                                                         | -2.751809000 | -1.489018000 | 1.643347000  |
| C                                                                                                                                                          | -4.379510000 | 0.465161000  | -1.273476000 | H                                                                                                                                                         | -0.937963000 | -2.305102000 | 0.802281000  |
| H                                                                                                                                                          | -3.892154000 | 0.941111000  | -2.130369000 | H                                                                                                                                                         | -1.429258000 | -0.743322000 | 0.144185000  |
| C                                                                                                                                                          | -3.944135000 | 1.186154000  | 0.000339000  | C                                                                                                                                                         | -4.005516000 | -0.740543000 | 1.218625000  |
| H                                                                                                                                                          | -2.852701000 | 1.128544000  | 0.000709000  | F                                                                                                                                                         | -5.808984000 | -0.747131000 | -0.333567000 |
| C                                                                                                                                                          | -4.379985000 | 0.464384000  | 1.273553000  | H                                                                                                                                                         | -5.034183000 | -2.444102000 | 0.388250000  |
| H                                                                                                                                                          | -3.893178000 | 0.940024000  | 2.130939000  | H                                                                                                                                                         | -2.892802000 | 0.371386000  | -1.216961000 |
| C                                                                                                                                                          | -4.367552000 | 2.653013000  | 0.000671000  | H                                                                                                                                                         | -2.775346000 | -0.535577000 | -2.724624000 |
| H                                                                                                                                                          | -3.982018000 | 3.165994000  | -0.883341000 | H                                                                                                                                                         | -4.326768000 | 0.139371000  | -2.208588000 |
| H                                                                                                                                                          | -5.452837000 | 2.738235000  | 0.000570000  | F                                                                                                                                                         | -2.091053000 | -0.744151000 | 2.634657000  |
| H                                                                                                                                                          | -3.982203000 | 3.165513000  | 0.885042000  | H                                                                                                                                                         | -3.013704000 | -2.444604000 | 2.110130000  |
| F                                                                                                                                                          | -1.090332000 | -2.047775000 | 0.000055000  | H                                                                                                                                                         | -3.729062000 | 0.270065000  | 0.918354000  |
| F                                                                                                                                                          | -1.061676000 | 0.494354000  | -1.483225000 | H                                                                                                                                                         | -4.702948000 | -0.667177000 | 2.053826000  |
| F                                                                                                                                                          | -1.061775000 | 0.493382000  | 1.483767000  | H                                                                                                                                                         | 4.361384000  | -2.029939000 | 2.221703000  |
| C                                                                                                                                                          | 0.703590000  | -1.100461000 | 1.266132000  | C                                                                                                                                                         | 3.376141000  | -2.083253000 | 1.760398000  |
| H                                                                                                                                                          | 1.789459000  | -1.166650000 | 1.360194000  | C                                                                                                                                                         | 3.500421000  | -2.639388000 | 0.340275000  |
| C                                                                                                                                                          | 0.304713000  | -1.839116000 | 0.000012000  | H                                                                                                                                                         | 2.939682000  | -1.085985000 | 1.786808000  |
| H                                                                                                                                                          | 0.751795000  | -2.836266000 | -0.000159000 | H                                                                                                                                                         | 2.747619000  | -2.740843000 | 2.359558000  |
| C                                                                                                                                                          | 0.703284000  | -1.100105000 | -1.266003000 | C                                                                                                                                                         | 4.414435000  | -1.798946000 | -0.559582000 |
| H                                                                                                                                                          | 1.789079000  | -1.166566000 | -1.360806000 | C                                                                                                                                                         | 2.152083000  | -2.770849000 | -0.376210000 |
| C                                                                                                                                                          | 0.328060000  | 0.372328000  | -1.274006000 | H                                                                                                                                                         | 3.937455000  | -3.640034000 | 0.402951000  |
| H                                                                                                                                                          | 0.796503000  | 0.864193000  | -2.130985000 | C                                                                                                                                                         | 3.834377000  | -0.433030000 | -0.902415000 |
| C                                                                                                                                                          | 0.729681000  | 1.110608000  | 0.000490000  | H                                                                                                                                                         | 4.624002000  | -2.353739000 | -1.481506000 |
| H                                                                                                                                                          | 1.822627000  | 1.097093000  | 0.000620000  | F                                                                                                                                                         | 5.651957000  | -1.621045000 | 0.069840000  |
| C                                                                                                                                                          | 0.328010000  | 0.371850000  | 1.274687000  | C                                                                                                                                                         | 1.523888000  | -1.429983000 | -0.725358000 |
| H                                                                                                                                                          | 0.796209000  | 0.863565000  | 2.131888000  | H                                                                                                                                                         | 2.274305000  | -3.372749000 | -1.283122000 |
| C                                                                                                                                                          | 0.249303000  | 2.560271000  | 0.000742000  | F                                                                                                                                                         | 1.259533000  | -3.485338000 | 0.438365000  |
| H                                                                                                                                                          | 0.614030000  | 3.087488000  | -0.883139000 | H                                                                                                                                                         | 3.707629000  | 0.156435000  | 0.005927000  |
| H                                                                                                                                                          | -0.838036000 | 2.609257000  | 0.000836000  | C                                                                                                                                                         | 2.480427000  | -0.606591000 | -1.570168000 |
| H                                                                                                                                                          | 0.614189000  | 3.087218000  | 0.884720000  | H                                                                                                                                                         | 4.517872000  | 0.101192000  | -1.563335000 |
| F                                                                                                                                                          | 3.695264000  | -2.015527000 | 0.000329000  | H                                                                                                                                                         | 1.310340000  | -0.884063000 | 0.193503000  |
| F                                                                                                                                                          | 3.641491000  | 0.502727000  | -1.468642000 | H                                                                                                                                                         | 0.587593000  | -1.590952000 | -1.257963000 |
| F                                                                                                                                                          | 3.642204000  | 0.502226000  | 1.468682000  | H                                                                                                                                                         | 2.594789000  | -1.051981000 | -2.563846000 |
| C                                                                                                                                                          | 5.458230000  | -1.025904000 | 1.267510000  | F                                                                                                                                                         | 1.910323000  | 0.663284000  | -1.785041000 |
| H                                                                                                                                                          | 6.546602000  | -1.065041000 | 1.374696000  | H                                                                                                                                                         | -0.251444000 | 3.952786000  | -2.401429000 |
| C                                                                                                                                                          | 5.081459000  | -1.777165000 | -0.000225000 | C                                                                                                                                                         | -0.571277000 | 3.182492000  | -1.701070000 |
| H                                                                                                                                                          | 5.551630000  | -2.763822000 | -0.000418000 | C                                                                                                                                                         | -0.645468000 | 3.767776000  | -0.288915000 |
| C                                                                                                                                                          | 5.457284000  | -1.025913000 | -1.268245000 | H                                                                                                                                                         | 0.126719000  | 2.350111000  | -1.778176000 |
| H                                                                                                                                                          | 6.545570000  | -1.065204000 | -1.376279000 | H                                                                                                                                                         | -1.554949000 | 2.825907000  | -2.004361000 |
| C                                                                                                                                                          | 5.033110000  | 0.435108000  | -1.274755000 | C                                                                                                                                                         | -1.115193000 | 2.754007000  | 0.758753000  |
| H                                                                                                                                                          | 5.474255000  | 0.943546000  | -2.136844000 | H                                                                                                                                                         | -1.367393000 | 4.589230000  | -0.297831000 |
| C                                                                                                                                                          | 5.412671000  | 1.190476000  | -0.000324000 | C                                                                                                                                                         | 0.690686000  | 4.340258000  | 0.200750000  |
| H                                                                                                                                                          | 6.509635000  | 1.227206000  | -0.000578000 | C                                                                                                                                                         | -0.100169000 | 1.653823000  | 1.025622000  |
| C                                                                                                                                                          | 5.033775000  | 0.435033000  | 1.274251000  | F                                                                                                                                                         | -2.315493000 | 2.163316000  | 0.327437000  |
| H                                                                                                                                                          | 5.475125000  | 0.943584000  | 2.136168000  | H                                                                                                                                                         | -1.359574000 | 3.272420000  | 1.691891000  |
| C                                                                                                                                                          | 4.874814000  | 2.620363000  | -0.000137000 | C                                                                                                                                                         | 1.746767000  | 3.274021000  | 0.461007000  |
| H                                                                                                                                                          | 5.215869000  | 3.162291000  | -0.883763000 | F                                                                                                                                                         | 1.183711000  | 5.245175000  | -0.745945000 |
| H                                                                                                                                                          | 3.786679000  | 2.620530000  | 0.000280000  | H                                                                                                                                                         | 0.520925000  | 4.923287000  | 1.113341000  |
| H                                                                                                                                                          | 5.216560000  | 3.162307000  | 0.883212000  | H                                                                                                                                                         | 0.070261000  | 1.091340000  | 0.107559000  |
| H                                                                                                                                                          | -4.509560000 | -1.498549000 | 2.129882000  | C                                                                                                                                                         | 1.219617000  | 2.263767000  | 1.467102000  |
| H                                                                                                                                                          | -4.511080000 | -1.497099000 | -2.130617000 | H                                                                                                                                                         | -0.482598000 | 0.971051000  | 1.784097000  |
| H                                                                                                                                                          | 0.259288000  | -1.593386000 | 2.132390000  | H                                                                                                                                                         | 1.987923000  | 2.754497000  | -0.466740000 |
| H                                                                                                                                                          | 0.258381000  | -1.592611000 | -2.132196000 | H                                                                                                                                                         | 2.657280000  | 3.742608000  | 0.836058000  |
| H                                                                                                                                                          | 5.029379000  | -1.532198000 | 2.133308000  | F                                                                                                                                                         | 2.164922000  | 1.232850000  | 1.616989000  |
| H                                                                                                                                                          | 5.027716000  | -1.532160000 | -2.133717000 | H                                                                                                                                                         | 1.118224000  | 2.720874000  | 2.456945000  |
| $\epsilon_{\text{ax}}$                                                                                                                                     |              |              |              | $\epsilon_{\text{eq}}$                                                                                                                                    |              |              |              |

|                                                                        |              |              |              |                                                                        |             |             |             |
|------------------------------------------------------------------------|--------------|--------------|--------------|------------------------------------------------------------------------|-------------|-------------|-------------|
| <b>Energy (hartrees) = -647.684180</b>                                 |              |              |              | <b>Energy (hartrees) = -647.693515</b>                                 |             |             |             |
| <b>Lowest harmonic vibrational frequency (cm<sup>-1</sup>) = 46.59</b> |              |              |              | <b>Lowest harmonic vibrational frequency (cm<sup>-1</sup>) = 60.25</b> |             |             |             |
| C                                                                      | 0.82586100   | 0.04854300   | -0.86648800  | C                                                                      | 0.93488500  | 0.21409900  | -0.48871500 |
| C                                                                      | 0.11830800   | 1.29748000   | -0.33539600  | C                                                                      | 0.26209500  | -1.12132200 | -0.82227600 |
| C                                                                      | -1.37149000  | 1.26947800   | -0.65875900  | C                                                                      | -0.94199600 | -1.37166000 | 0.07111100  |
| C                                                                      | -2.06949600  | -0.03084000  | -0.27509700  | C                                                                      | -1.94194300 | -0.23014200 | -0.06318100 |
| C                                                                      | -1.31107200  | -1.27893700  | -0.71451000  | C                                                                      | -1.30859700 | 1.12941700  | 0.20428000  |
| C                                                                      | 0.17704400   | -1.25016100  | -0.38343200  | C                                                                      | -0.09974000 | 1.31924400  | -0.69873200 |
| H                                                                      | -1.86349900  | 2.10257400   | -0.15515700  | H                                                                      | -1.41269600 | -2.31968800 | -0.18970500 |
| H                                                                      | 0.59134100   | 2.17569800   | -0.78345300  | H                                                                      | -0.02395800 | -1.13057100 | -1.88015200 |
| H                                                                      | 0.64033200   | 0.06561500   | -1.94799300  | H                                                                      | 1.78056000  | 0.38000700  | -1.16590400 |
| H                                                                      | -3.07379200  | -0.04539900  | -0.70935000  | H                                                                      | -2.40245800 | -0.24435200 | -1.05785900 |
| H                                                                      | -1.76421500  | -2.15549000  | -0.24967800  | H                                                                      | -2.03339100 | 1.92475200  | 0.03075600  |
| H                                                                      | -1.42328400  | -1.38802600  | -1.79746000  | H                                                                      | -0.98219100 | 1.17530300  | 1.24386400  |
| H                                                                      | 0.69101100   | -2.09229200  | -0.85574300  | H                                                                      | -0.40191200 | 1.32468300  | -1.75232300 |
| H                                                                      | -1.49343300  | 1.42090800   | -1.73565300  | H                                                                      | -0.60178300 | -1.42402300 | 1.10617700  |
| O                                                                      | 2.23190200   | 0.09200100   | -0.77746100  | O                                                                      | 1.35882200  | 0.25008800  | 0.85684900  |
| C                                                                      | 2.85487700   | -0.06300500  | 0.50207100   | C                                                                      | 2.72266400  | -0.08584000 | 1.07248500  |
| H                                                                      | 2.47178700   | 0.64992500   | 1.23186600   | H                                                                      | 3.38448800  | 0.59854200  | 0.52912600  |
| H                                                                      | 2.72398800   | -1.07370400  | 0.89257100   | H                                                                      | 2.90233900  | 0.02376100  | 2.14076800  |
| H                                                                      | 3.91397800   | 0.12276100   | 0.32926700   | H                                                                      | 2.93790900  | -1.11380600 | 0.77106200  |
| F                                                                      | 0.28563300   | 1.42640800   | 1.04720300   | F                                                                      | 0.48743600  | 2.55679900  | -0.44876400 |
| F                                                                      | -2.24830700  | -0.06562700  | 1.11144900   | F                                                                      | -2.98237600 | -0.43363100 | 0.84947700  |
| F                                                                      | 0.33893900   | -1.41344100  | 0.99580800   | F                                                                      | 1.18586100  | -2.15833100 | -0.65409400 |
| <b>9<sub>ax</sub></b>                                                  |              |              |              | <b>9<sub>eq</sub></b>                                                  |             |             |             |
| <b>Energy (hartrees) = -741.126898</b>                                 |              |              |              | <b>Energy (hartrees) = -741.123371</b>                                 |             |             |             |
| <b>Lowest harmonic vibrational frequency (cm<sup>-1</sup>) = 11.03</b> |              |              |              | <b>Lowest harmonic vibrational frequency (cm<sup>-1</sup>) = 11.94</b> |             |             |             |
| C                                                                      | -0.348406000 | 0.024415000  | 0.440421000  | C                                                                      | -0.30717500 | 0.00433000  | -0.77014500 |
| C                                                                      | 0.547502000  | 1.260373000  | 0.462730000  | C                                                                      | 0.59150100  | -1.23858300 | -0.85086500 |
| C                                                                      | 1.912562000  | 0.988801000  | 1.075527000  | C                                                                      | 1.65453600  | -1.26596200 | 0.23871600  |
| C                                                                      | 2.609843000  | -0.251682000 | 0.532332000  | C                                                                      | 2.50281900  | -0.00360700 | 0.18300100  |
| C                                                                      | 1.702397000  | -1.474024000 | 0.492717000  | C                                                                      | 1.65922700  | 1.26155800  | 0.24590200  |
| C                                                                      | 0.340075000  | -1.217339000 | -0.132120000 | C                                                                      | 0.59609300  | 1.24430200  | -0.84381200 |
| N                                                                      | -1.583383000 | 0.308329000  | -0.253428000 | N                                                                      | -1.14610800 | 0.00246900  | 0.40447500  |
| C                                                                      | -2.799772000 | -0.060528000 | 0.240911000  | C                                                                      | -2.51493500 | 0.00253800  | 0.32739800  |
| C                                                                      | -3.986767000 | 0.223114000  | -0.654833000 | C                                                                      | -3.23891700 | -0.00921100 | 1.65798500  |
| O                                                                      | -2.930834000 | -0.583176000 | 1.335619000  | O                                                                      | -3.11710800 | 0.00701200  | -0.72775600 |
| F                                                                      | 0.476927000  | -1.067298000 | -1.517700000 | F                                                                      | -0.18166700 | 2.39245900  | -0.73953300 |
| F                                                                      | 0.702603000  | 1.736616000  | -0.847320000 | F                                                                      | -0.19068700 | -2.38434500 | -0.75293900 |
| F                                                                      | 3.086429000  | 0.013557000  | -0.755554000 | F                                                                      | 3.39158100  | -0.00834800 | 1.26276700  |
| H                                                                      | -0.617187000 | -0.208515000 | 1.473958000  | H                                                                      | -0.98996300 | 0.00801600  | -1.61906000 |
| H                                                                      | 0.037192000  | 2.055298000  | 1.013106000  | H                                                                      | 1.06478100  | -1.26282800 | -1.83867400 |
| H                                                                      | 2.552510000  | 1.859451000  | 0.926731000  | H                                                                      | 1.17514600  | -1.33256600 | 1.21872200  |
| H                                                                      | 1.778619000  | 0.861577000  | 2.154373000  | H                                                                      | 2.28216700  | -2.14974700 | 0.12360300  |
| H                                                                      | 3.491005000  | -0.470462000 | 1.142720000  | H                                                                      | 3.11846200  | -0.00217300 | -0.72310400 |
| H                                                                      | 2.201348000  | -2.279151000 | -0.048148000 | H                                                                      | 1.18010800  | 1.32439100  | 1.22629300  |
| H                                                                      | 1.544662000  | -1.818355000 | 1.519653000  | H                                                                      | 2.29013900  | 2.14364000  | 0.13578300  |
| H                                                                      | -0.315932000 | -2.078414000 | 0.019342000  | H                                                                      | 1.06954100  | 1.27224100  | -1.83144700 |
| H                                                                      | -1.502142000 | 0.649969000  | -1.196729000 | H                                                                      | -0.72420700 | -0.00058600 | 1.31570000  |
| H                                                                      | -4.732760000 | 0.767371000  | -0.076645000 | H                                                                      | -3.83635300 | -0.91950400 | 1.71420900  |
| H                                                                      | -4.429998000 | -0.728708000 | -0.950543000 | H                                                                      | -3.92395400 | 0.83785700  | 1.68256000  |
| H                                                                      | -3.735201000 | 0.792376000  | -1.549700000 | H                                                                      | -2.57818300 | 0.03780700  | 2.52440400  |
| <b>10<sub>ax</sub></b>                                                 |              |              |              | <b>10<sub>eq</sub></b>                                                 |             |             |             |
| <b>Energy (hartrees) = -934.159410</b>                                 |              |              |              | <b>Energy (hartrees) = -934.157267</b>                                 |             |             |             |
| <b>Lowest harmonic vibrational frequency (cm<sup>-1</sup>) = 17.37</b> |              |              |              | <b>Lowest harmonic vibrational frequency (cm<sup>-1</sup>) = 17.96</b> |             |             |             |
| F                                                                      | 2.094445000  | -1.748871000 | 0.885318000  | F                                                                      | 1.23943300  | -2.38775700 | -0.93810700 |
| F                                                                      | 1.56160100   | 1.03066100   | 1.45428000   | F                                                                      | 1.24159700  | 2.39019700  | -0.93366300 |
| F                                                                      | 4.31459400   | 0.18845100   | 0.93407400   | F                                                                      | 4.19238600  | -0.00279100 | 1.91688500  |
| O                                                                      | -2.43382500  | -0.39798800  | 0.42514700   | O                                                                      | -2.07569900 | -0.00027900 | 0.63695200  |
| O                                                                      | -1.53906500  | 0.58116000   | -1.43736800  | O                                                                      | -1.63869900 | 0.00195500  | -1.60709300 |
| N                                                                      | -0.25502500  | -0.56910600  | 0.05324800   | N                                                                      | 0.02684600  | 0.00092500  | -0.04275500 |
| C                                                                      | 1.00277000   | -0.17180800  | -0.53419300  | C                                                                      | 1.12280600  | 0.00130900  | -0.97612000 |
| H                                                                      | 0.81793500   | 0.01698700   | -1.59471300  | H                                                                      | 0.67278900  | 0.00245600  | -1.96804800 |
| C                                                                      | 2.00559200   | -1.31852300  | -0.44574100  | C                                                                      | 2.01731100  | -1.23970100 | -0.83225500 |
| H                                                                      | 1.61778500   | -2.16980600  | -1.01157200  | C                                                                      | 2.72435400  | -1.25972500 | -1.66899800 |
| C                                                                      | 3.38655200   | -0.93292100  | -0.95364000  | C                                                                      | 2.77086100  | -1.26523200 | 0.49020800  |
| H                                                                      | 3.33286700   | -0.84387800  | -2.04326800  | H                                                                      | 3.40873700  | -2.14790600 | 0.53824800  |
| H                                                                      | 4.08862000   | -1.73619100  | -0.72653100  | H                                                                      | 2.05929700  | -1.33132500 | 1.31695900  |
| C                                                                      | 3.92061600   | 0.37949700   | -0.39425700  | C                                                                      | 3.60446800  | -0.00131400 | 0.64776100  |
| H                                                                      | 4.82457800   | 0.66596700   | -0.94005200  | H                                                                      | 4.42916900  | -0.00097100 | -0.07337000 |
| C                                                                      | 1.52545500   | 1.14078500   | 0.05992800   | C                                                                      | 2.01840800  | 1.24123600  | -0.82989200 |
| H                                                                      | 0.80708400   | 1.93227800   | -0.16834800  | H                                                                      | 2.72551200  | 1.26216100  | -1.66656300 |
| C                                                                      | -1.43409000  | -0.06035300  | -0.41060000  | C                                                                      | -1.27850600 | 0.00093000  | -0.45149200 |
| C                                                                      | 2.90475200   | 1.51202600   | -0.46183200  | C                                                                      | 2.77194000  | 1.26361400  | 0.49263700  |
| H                                                                      | 3.28207900   | 2.37159800   | 0.09358700   | H                                                                      | 2.06041300  | 1.32872800  | 1.31949700  |
| H                                                                      | 2.80080200   | 1.81849900   | -1.50752300  | H                                                                      | 3.41056800  | 2.14565100  | 0.54236800  |
| C                                                                      | -3.82513100  | -0.00236600  | 0.15722600   | C                                                                      | -3.54132600 | -0.00051200 | 0.50895600  |
| C                                                                      | -4.30522700  | -0.63229600  | -1.14774400  | C                                                                      | -3.99906000 | -0.00269900 | 1.96362900  |
| H                                                                      | -5.37325500  | -0.44308400  | -1.26967600  | H                                                                      | -3.62834500 | 0.88287400  | 2.48229500  |
| H                                                                      | -4.15010300  | -1.71221500  | -1.12335200  | H                                                                      | -3.62793900 | -0.88787300 | 2.48053100  |
| H                                                                      | -3.77509100  | -0.21771200  | -2.00148200  | H                                                                      | -5.08870100 | -0.00236600 | 2.01123500  |
| C                                                                      | -4.57047400  | -0.59192800  | 1.34981400   | C                                                                      | -4.00375000 | 1.26818700  | -0.20308900 |
| H                                                                      | -4.19266000  | -0.17163600  | 2.28250700   | H                                                                      | -3.68086500 | 1.27560700  | -1.24095400 |

|                                                                                                                                            |              |              |              |                                                                                                                                            |              |              |              |
|--------------------------------------------------------------------------------------------------------------------------------------------|--------------|--------------|--------------|--------------------------------------------------------------------------------------------------------------------------------------------|--------------|--------------|--------------|
| H                                                                                                                                          | -4.44403100  | -1.67462400  | 1.38236200   | H                                                                                                                                          | -3.60136500  | 2.14953500   | 0.29903800   |
| H                                                                                                                                          | -5.63496000  | -0.36723200  | 1.27203700   | H                                                                                                                                          | -5.09340100  | 1.32371600   | -0.17169100  |
| C                                                                                                                                          | -3.94326200  | 1.51975800   | 0.14395000   | C                                                                                                                                          | -4.00314700  | -1.26801200  | -0.20561000  |
| H                                                                                                                                          | -3.52916000  | 1.93685000   | 1.06344200   | H                                                                                                                                          | -3.68030700  | -1.27320000  | -1.24350200  |
| H                                                                                                                                          | -4.99643500  | 1.80031500   | 0.08552800   | H                                                                                                                                          | -5.09276900  | -1.32414400  | -0.17426900  |
| H                                                                                                                                          | -3.41821100  | 1.94711000   | -0.70653100  | H                                                                                                                                          | -3.60030300  | -2.15016400  | 0.29473400   |
| H                                                                                                                                          | -0.23064200  | -0.91825200  | 0.99809100   | H                                                                                                                                          | 0.18965000   | -0.00039100  | 0.94846500   |
| <b>11<sub>ax</sub></b><br><b>Energy (hartrees) = -641.939096</b><br><b>Lowest harmonic vibrational frequency (cm<sup>-1</sup>) = 11.10</b> |              |              |              | <b>11<sub>eq</sub></b><br><b>Energy (hartrees) = -641.932226</b><br><b>Lowest harmonic vibrational frequency (cm<sup>-1</sup>) = 17.43</b> |              |              |              |
| C                                                                                                                                          | -0.069506000 | -0.000004000 | -0.368306000 | C                                                                                                                                          | -0.08469500  | -0.00226400  | -0.65679200  |
| C                                                                                                                                          | 0.716232000  | -1.279156000 | -0.074772000 | C                                                                                                                                          | -0.98083100  | 1.24378300   | -0.60007900  |
| C                                                                                                                                          | 2.117066000  | -1.258760000 | -0.661069000 | C                                                                                                                                          | -1.86899400  | 1.27340100   | 0.63269300   |
| C                                                                                                                                          | 2.882745000  | 0.000532000  | -0.250735000 | C                                                                                                                                          | -2.73039300  | 0.00632800   | 0.70162500   |
| C                                                                                                                                          | 2.116559000  | 1.260041000  | -0.659434000 | C                                                                                                                                          | -1.87549800  | -1.26531200  | 0.63598600   |
| C                                                                                                                                          | 0.715735000  | 1.279085000  | -0.073045000 | C                                                                                                                                          | -0.98736400  | -1.24338600  | -0.59695800  |
| N                                                                                                                                          | -1.337202000 | -0.000770000 | 0.325655000  | N                                                                                                                                          | 0.91784500   | -0.00356200  | 0.38395600   |
| C                                                                                                                                          | -2.536448000 | 0.000256000  | -0.321626000 | C                                                                                                                                          | 2.26019800   | -0.00373000  | 0.11453900   |
| C                                                                                                                                          | -3.762498000 | -0.000708000 | 0.567635000  | C                                                                                                                                          | 3.16493600   | 0.00183000   | 1.33070100   |
| O                                                                                                                                          | -2.628653000 | 0.001711000  | -1.538296000 | O                                                                                                                                          | 2.71093500   | -0.00597700  | -1.01415500  |
| F                                                                                                                                          | 0.813532000  | 1.437110000  | 1.323967000  | F                                                                                                                                          | -0.19440000  | -2.38959700  | -0.62401300  |
| H                                                                                                                                          | 0.814062000  | -1.439000000 | 1.322039000  | F                                                                                                                                          | -0.18168000  | 2.38568100   | -0.62956400  |
| H                                                                                                                                          | -0.301354000 | 0.000711000  | -1.436188000 | H                                                                                                                                          | 0.46768600   | -0.00489700  | -1.59581500  |
| H                                                                                                                                          | 0.144270000  | -2.137174000 | -0.436498000 | H                                                                                                                                          | -1.60025700  | 1.26848700   | -1.50351300  |
| H                                                                                                                                          | 2.640336000  | -2.161492000 | -0.340564000 | H                                                                                                                                          | -1.23848200  | 1.35772400   | 1.52307800   |
| H                                                                                                                                          | 2.027449000  | -1.307909000 | -1.751676000 | H                                                                                                                                          | -2.49149400  | 2.16896000   | 0.60433700   |
| H                                                                                                                                          | 3.874818000  | 0.001001000  | -0.705855000 | H                                                                                                                                          | -3.44183900  | 0.00706400   | -0.13091500  |
| H                                                                                                                                          | 2.639455000  | 2.162589000  | -0.337819000 | H                                                                                                                                          | -1.24532900  | -1.35055300  | 1.52652200   |
| H                                                                                                                                          | 2.026876000  | 1.310552000  | -1.749977000 | H                                                                                                                                          | -2.50259000  | -0.89743500  | 0.60997500   |
| H                                                                                                                                          | 0.143394000  | 2.137338000  | -0.433614000 | H                                                                                                                                          | -1.60711600  | -1.26681700  | -1.50021300  |
| H                                                                                                                                          | -1.302587000 | -0.001614000 | 1.331166000  | H                                                                                                                                          | 0.62946600   | -0.00057700  | 1.34558600   |
| H                                                                                                                                          | -4.360599000 | -0.880067000 | 0.327941000  | H                                                                                                                                          | 3.78532500   | 0.89740000   | 1.29170600   |
| H                                                                                                                                          | -4.361250000 | 0.878355000  | 0.328695000  | H                                                                                                                                          | 3.82689400   | -0.86176700  | 1.26913600   |
| H                                                                                                                                          | -3.533869000 | -0.001123000 | 1.633577000  | H                                                                                                                                          | 2.63189400   | -0.02223700  | 2.28203100   |
| H                                                                                                                                          | 3.025045000  | -0.000172000 | 0.831651000  | H                                                                                                                                          | -3.32598600  | 0.00905500   | 1.61553200   |
| <b>12<sub>ax</sub></b><br><b>Energy (hartrees) = -834.971615</b><br><b>Lowest harmonic vibrational frequency (cm<sup>-1</sup>) = 17.47</b> |              |              |              | <b>12<sub>eq</sub></b><br><b>Energy (hartrees) = -834.966124</b><br><b>Lowest harmonic vibrational frequency (cm<sup>-1</sup>) = 17.82</b> |              |              |              |
| F                                                                                                                                          | 2.345822000  | -1.738220000 | 0.958545000  | F                                                                                                                                          | -1.569095000 | 2.388069000  | -0.693083000 |
| F                                                                                                                                          | 1.819141000  | 1.016637000  | 1.593935000  | F                                                                                                                                          | -1.568075000 | -2.387789000 | -0.693535000 |
| O                                                                                                                                          | -2.171119000 | -0.394638000 | 0.409358000  | O                                                                                                                                          | 1.864707000  | 0.000337000  | 0.601913000  |
| O                                                                                                                                          | -1.237062000 | 0.620255000  | -1.414712000 | O                                                                                                                                          | 1.239002000  | 0.000197000  | -1.597484000 |
| N                                                                                                                                          | 0.020273000  | -0.525365000 | 0.102398000  | N                                                                                                                                          | -0.287941000 | 0.000338000  | 0.102908000  |
| C                                                                                                                                          | 1.293637000  | -0.117896000 | -0.445162000 | C                                                                                                                                          | -1.465262000 | 0.000164000  | -0.728688000 |
| H                                                                                                                                          | 1.133283000  | 0.102259000  | -1.503299000 | C                                                                                                                                          | -1.105475000 | 0.000339000  | -1.756851000 |
| C                                                                                                                                          | 2.289654000  | -1.272923000 | -0.370688000 | H                                                                                                                                          | -2.339896000 | 1.242336000  | -0.500852000 |
| H                                                                                                                                          | 1.910289000  | -2.108851000 | -0.963667000 | H                                                                                                                                          | -3.126577000 | 1.260187000  | -1.263370000 |
| C                                                                                                                                          | 3.689101000  | -0.873797000 | -0.806426000 | C                                                                                                                                          | -2.964645000 | 1.27011000   | 0.883977000  |
| H                                                                                                                                          | 3.666157000  | -0.688087000 | -1.885793000 | H                                                                                                                                          | -3.584368000 | 2.162891000  | 0.980389000  |
| H                                                                                                                                          | 4.356714000  | -1.721320000 | -0.640665000 | H                                                                                                                                          | -2.169194000 | 1.357342000  | 1.630000000  |
| C                                                                                                                                          | 4.182141000  | 0.372365000  | -0.068349000 | C                                                                                                                                          | -3.790548000 | -0.000507000 | 1.122553000  |
| H                                                                                                                                          | 5.176939000  | 0.647882000  | -0.423299000 | H                                                                                                                                          | -4.655532000 | -0.000620000 | 0.450853000  |
| C                                                                                                                                          | 1.809195000  | 1.175872000  | 0.196107000  | C                                                                                                                                          | -2.339375000 | -1.242426000 | -0.501099000 |
| H                                                                                                                                          | 1.098202000  | 1.978089000  | -0.015354000 | H                                                                                                                                          | -3.126040000 | -1.260477000 | -1.263629000 |
| C                                                                                                                                          | -1.150669000 | -0.031089000 | -0.392533000 | C                                                                                                                                          | 0.975260000  | 0.000307000  | -0.415912000 |
| C                                                                                                                                          | 3.211267000  | 1.538686000  | -0.261666000 | C                                                                                                                                          | -2.964111000 | -1.270730000 | 0.883724000  |
| H                                                                                                                                          | 3.540000000  | 2.421775000  | 0.289285000  | H                                                                                                                                          | -2.168615000 | -1.357768000 | 1.629720000  |
| H                                                                                                                                          | 3.161440000  | 1.818846000  | -1.319496000 | H                                                                                                                                          | -3.583457000 | -2.163790000 | 0.979968000  |
| C                                                                                                                                          | -3.559333000 | -0.023490000 | 0.099101000  | C                                                                                                                                          | 3.312027000  | 0.000002000  | 0.347708000  |
| C                                                                                                                                          | -3.707905000 | 1.496126000  | 0.097794000  | C                                                                                                                                          | 3.894819000  | 0.000253000  | 1.757220000  |
| H                                                                                                                                          | -3.334690000 | 1.910861000  | 1.035709000  | H                                                                                                                                          | 3.569858000  | -0.884956000 | 2.305401000  |
| H                                                                                                                                          | -4.763803000 | 1.756682000  | 0.005048000  | H                                                                                                                                          | 3.570103000  | 0.885810000  | 2.304984000  |
| H                                                                                                                                          | -3.161599000 | 1.942999000  | -0.728918000 | H                                                                                                                                          | 4.984562000  | 0.000093000  | 1.710452000  |
| C                                                                                                                                          | -3.984171000 | -0.647790000 | -1.227783000 | C                                                                                                                                          | 3.712091000  | -1.268276000 | -0.402406000 |
| H                                                                                                                                          | -5.051383000 | -0.478772000 | -1.382482000 | H                                                                                                                                          | 3.300185000  | -1.275138000 | -1.408228000 |
| H                                                                                                                                          | -3.807691000 | -1.724585000 | -1.210040000 | H                                                                                                                                          | 3.354423000  | -2.149922000 | 0.132080000  |
| H                                                                                                                                          | -3.435068000 | -0.212992000 | -2.059149000 | H                                                                                                                                          | 4.800449000  | -1.323717000 | -0.465380000 |
| C                                                                                                                                          | -4.332847000 | -0.640813000 | 1.259458000  | C                                                                                                                                          | 3.712490000  | 1.267773000  | -0.403044000 |
| H                                                                                                                                          | -4.186791000 | -1.721279000 | 1.284180000  | H                                                                                                                                          | 3.355203000  | 2.149806000  | 0.131058000  |
| H                                                                                                                                          | -5.398324000 | -0.435284000 | 1.148726000  | H                                                                                                                                          | 3.300471000  | 1.274297000  | -1.408824000 |
| H                                                                                                                                          | -3.994275000 | -0.224529000 | 2.208901000  | H                                                                                                                                          | 4.800861000  | 1.322782000  | -0.466169000 |
| H                                                                                                                                          | 0.018517000  | -0.898107000 | 1.038151000  | H                                                                                                                                          | -0.364340000 | 0.000328000  | 1.104262000  |
| H                                                                                                                                          | 4.270528000  | 0.149777000  | 0.996768000  | H                                                                                                                                          | -4.189184000 | -0.000692000 | 2.137982000  |

## References

1. Gaussian 16, Revision C.01, M. J. Frisch, G. W. Trucks, H. B. Schlegel, G. E. Scuseria, M. A. Robb, J. R. Cheeseman, G.



- Scalmani, V. Barone, G. A. Petersson, H. Nakatsuji, X. Li, M. Caricato, A. V. Marenich, J. Bloino, B. G. Janesko, R. Gomperts, B. Mennucci, H. P. Hratchian, J. V. Ortiz, A. F. Izmaylov, J. L. Sonnenberg, D. Williams-Young, F. Ding, F. Lipparini, F. Egidi, J. Goings, B. Peng, A. Petrone, T. Henderson, D. Ranasinghe, V. G. Zakrzewski, J. Gao, N. Rega, G. Zheng, W. Liang, M. Hada, M. Ehara, K. Toyota, R. Fukuda, J. Hasegawa, M. Ishida, T. Nakajima, Y. Honda, O. Kitao, H. Nakai, T. Vreven, K. Throssell, J. A. Montgomery, Jr., J. E. Peralta, F. Ogliaro, M. J. Bearpark, J. J. Heyd, E. N. Brothers, K. N. Kudin, V. N. Staroverov, T. A. Keith, R. Kobayashi, J. Normand, K. Raghavachari, A. P. Rendell, J. C. Burant, S. S. Iyengar, J. Tomasi, M. Cossi, J. M. Millam, M. Klene, C. Adamo, R. Cammi, J. W. Ochterski, R. L. Martin, K. Morokuma, O. Farkas, J. B. Foresman, and D. J. Fox, Gaussian, Inc., Wallingford CT, 2016.
2. J. Perdew, M. Ernzerhof, K. Burke, *J. Chem. Phys.*, **1996**, 105, 9982.
  3. S. Grimme, J. Antony, S. Ehrlich, H. Krieg, *J. Chem. Phys.*, **2010**, 132, 154104.
  4. T. J. Poskin, B. A. Piscelli, K. Yoshida, D. B. Cordes, A. M. Z. Slawin, R. A. Cormanich, S. Yamada, D. O'Hagan, *Chem. Commun.*, **2022**, 58, 7968-7971.
  5. P. Pracht, F. Bohle, S. Grimme, *PhysChemChemPhys*, **2020**, 22, 7169-7192.
  6. C. Bannwarth, S. Ehlert, S. Grimme, *J. Chem. Theory Comput.*, **2019**, 15, 1652-1671.
  7. A. Altun, F. Neese, G. Bistoni, *J. Chem. Theory Comput.*, **2019**, 15, 11, 5894-5907.
  8. F. Neese, F. Wennmohs, U. Becker, C. Riplinger, *J. Chem. Phys.*, **2020**, 152, 224108.
  9. M. Giovanetti, L. F. F. Bitencourt, R. A. Cormanich, S. P. A. Sauer, *J. Chem. Theory Comput.*, **2021**, 17, 12, 7712-7723.
  10. S. Spicher, C. Plett, P. Pracht, A. Hansen, S. Grimme, *J. Chem. Theory Comput.*, **2022**, 18, 5, 3174-3189.
  11. C. Bannwarth, E. Caldeweyher, S. Ehlert, A. Hansen, P. Pracht, J. Seibert, S. Spicher, S. Grimme, *WIREs Comput. Mol. Sci.*, **2021**, 11, 1493-1542.
